# Supplementary material for: A Study on Synthesis and Upscaling of 2′-O-AECM-5-methyl Pyrimidine Phosphoramidites for Oligonucleotide Synthesis
Source: MDPI journal article supplement (doi:10.3390/molecules26226927), 2021-11-17
Supplement: s1 [file s1]

## Supporting Information

# A Study on Synthesis and Upscaling of 2'-O-AECM-5-methyl Pyrimidine Phosphoramidites for Oligonucleotide Synthesis

**Kristina Karalé<sup>1,2,4</sup>, Martin Bollmark<sup>2</sup>, Rouven Stulz<sup>3</sup>, Dmytro Honcharenko<sup>1</sup>, Ulf Tedebark<sup>2</sup> and Roger Strömberg<sup>1,\*</sup>**

<sup>1</sup> Department of Biosciences and Nutrition, Karolinska Institutet, Neo, 141 83 Huddinge, Stockholm, Sweden; [kristina.druceikaite@ki.se](mailto:kristina.druceikaite@ki.se) (K.K.),  
[dmytro.honcharenko@ki.se](mailto:dmytro.honcharenko@ki.se) (D.H), [roger.stromberg@ki.se](mailto:roger.stromberg@ki.se) (R.Sg)

<sup>2</sup> RISE, Department Chemical Process and Pharmaceutical Development, Forskargatan 18, SE-15136 Södertälje, Sweden; [kristina.druceikaite@ri.se](mailto:kristina.druceikaite@ri.se) (K.K.),  
[martin.bollmark@ri.se](mailto:martin.bollmark@ri.se) (M.B.), [ulf.tedebark@ri.se](mailto:ulf.tedebark@ri.se) (U.T.)

<sup>3</sup> Oligonucleotide Discovery, Discovery Sciences, BioPharmaceuticals R&D, AstraZeneca, Gothenburg, Sweden; [rouven.stulz@astrazeneca.com](mailto:rouven.stulz@astrazeneca.com) (R.Sz).

<sup>4</sup> née - Druceikaite

\* Correspondence: [roger.stromberg@ki.se](mailto:roger.stromberg@ki.se); Tel.: +46852481024

## Contents

|                                                                                                                                                |         |
|------------------------------------------------------------------------------------------------------------------------------------------------|---------|
| <b>Tables S1-S2</b> Screen for different conditions for 2'OH alkylation of compound <b>3</b> .....                                             | S4      |
| <b>Table S3</b> Screen for different conditions for N4 acetylation of compound <b>13</b> .....                                                 | S5      |
| <b>Figure S1</b> HPLC profile of crude compound <b>2</b> in 50 g scale synthesis.....                                                          | S6      |
| <b>Figures S2-S3</b> HPLC profiles of screen for different conditions for 2'OH alkylation of compound <b>3</b> .....                           | S7-S8   |
| <b>Figures S4-S15</b> <sup>1</sup> H NMR, <sup>13</sup> C NMR, <sup>19</sup> F NMR and <sup>31</sup> P NMR spectra for MeU intermediates.....  | S9-S20  |
| <b>Figures S16-S33</b> <sup>1</sup> H NMR, <sup>13</sup> C NMR, <sup>19</sup> F NMR and <sup>31</sup> P NMR spectra for MeC intermediates..... | S21-S38 |
| <b>Figures S34-S37</b> HPLC profiles of MeU intermediates.....                                                                                 | S39-S42 |
| <b>Figures S38-S45</b> HPLC profiles of MeC intermediates.....                                                                                 | S43-S50 |
| <b>Figures S46-S57</b> ESI-TOF mass spectra for MeU and MeC intermediates.....                                                                 | S51-S62 |

Table S1. Screen for different conditions of MeU 2'alkylation (compound **3**).

| No. | Methyl 2-bromoacetate | Solvent, 5 vol | K <sub>2</sub> CO <sub>3</sub> | PTC catalyst, 0.2 equiv. | HPLC area%, conver., 40°C, 1h | HPLC area%, conver., 40°C, 4.5 h | HPLC area%, conver., RT, overnight |
|-----|-----------------------|----------------|--------------------------------|--------------------------|-------------------------------|----------------------------------|------------------------------------|
| 1.  | 2 equiv.              | MeCN           | 2 equiv.                       | TBABr                    | 26%                           | 71%                              | 89%                                |
| 2.  | 4 equiv.              | MeCN           | 2 equiv.                       | TBABr                    | 36%                           | 78%                              | 85%                                |
| 3.  | 2 equiv.              | MeCN           | 4 equiv.                       | TBABr                    | 42%                           | 81%                              | 84%                                |
| 4.  | 4 equiv.              | MeCN           | 4 equiv.                       | TBABr                    | 46%                           | 80%                              | 88%                                |

Table S2. Screen for different conditions of MeU 2'alkylation (compound **3**).

| No. | Methyl 2-bromoacetate | Solvent, 5 vol | Base, 4 eq                     | PTC agent, 0.2 equiv. | HPLC area%, conver., RT, over weekend |
|-----|-----------------------|----------------|--------------------------------|-----------------------|---------------------------------------|
| 1.  | 2 equiv.              | Heptane        | K <sub>2</sub> CO <sub>3</sub> | TBABr                 | 96%                                   |
| 2.  | 2 equiv.              | MeCN           | K <sub>2</sub> CO <sub>3</sub> | TBABr                 | 85%                                   |
| 3.  | 2 equiv.              | Heptane        | K <sub>3</sub> PO <sub>4</sub> | TBABr                 | 96%                                   |
| 4.  | 2 equiv.              | MeCN           | K <sub>3</sub> PO <sub>4</sub> | TBABr                 | 85%                                   |

Table S3. Screen for different conditions for N4 acetylation MeC (compound **13**).

| No. | Solvent, 5 vol | A   | B   | C   | D   | E   | F   | G   |
|-----|----------------|-----|-----|-----|-----|-----|-----|-----|
| 1.  | MeOH           | 14% | 7%* | 0%  | 11% | 0%  | 0%  | 0%  |
| 2.  | DCM            | 55% | 82% | 84% | 92% | 92% | 90% | 80% |
| 3.  | Toluene        | 43% | 79% | 84% | 89% | 88% | 86% | 81% |
| 4.  | DMF            | 67% | 86% | 83% | 86% | 82% | 80% | 83% |
| 5.  | MeCN           | 59% | 87% | 85% | 87% | 84% | 83% | 84% |

\*degradation

A= HPLC area%, conver., RT, 4.5 h

B= HPLC area%, conver., RT, overnight, +0.5 equiv. Ac<sub>2</sub>O

C= HPLC area%, conver., +0.5 equiv. Ac<sub>2</sub>O, over weekend

D= HPLC area%, conver., +0.5 equiv. Ac<sub>2</sub>O, over weekend, additional 0.5 equiv. Ac<sub>2</sub>O, 1h

E= HPLC area%, conver., +0.5 equiv. Ac<sub>2</sub>O, over weekend +0.5 equiv. TEA, 1 h

F= HPLC area%, conver., +0.5 equiv. Ac<sub>2</sub>O, over weekend, additional 0.5 equiv. Ac<sub>2</sub>O, 1h, then 0.5 equiv. TEA

G= HPLC area%, conver., +0.5 equiv. Ac<sub>2</sub>O, over weekend, additional 0.5 equiv. Ac<sub>2</sub>O, 1h, then 0.5 equiv. Ac<sub>2</sub>O

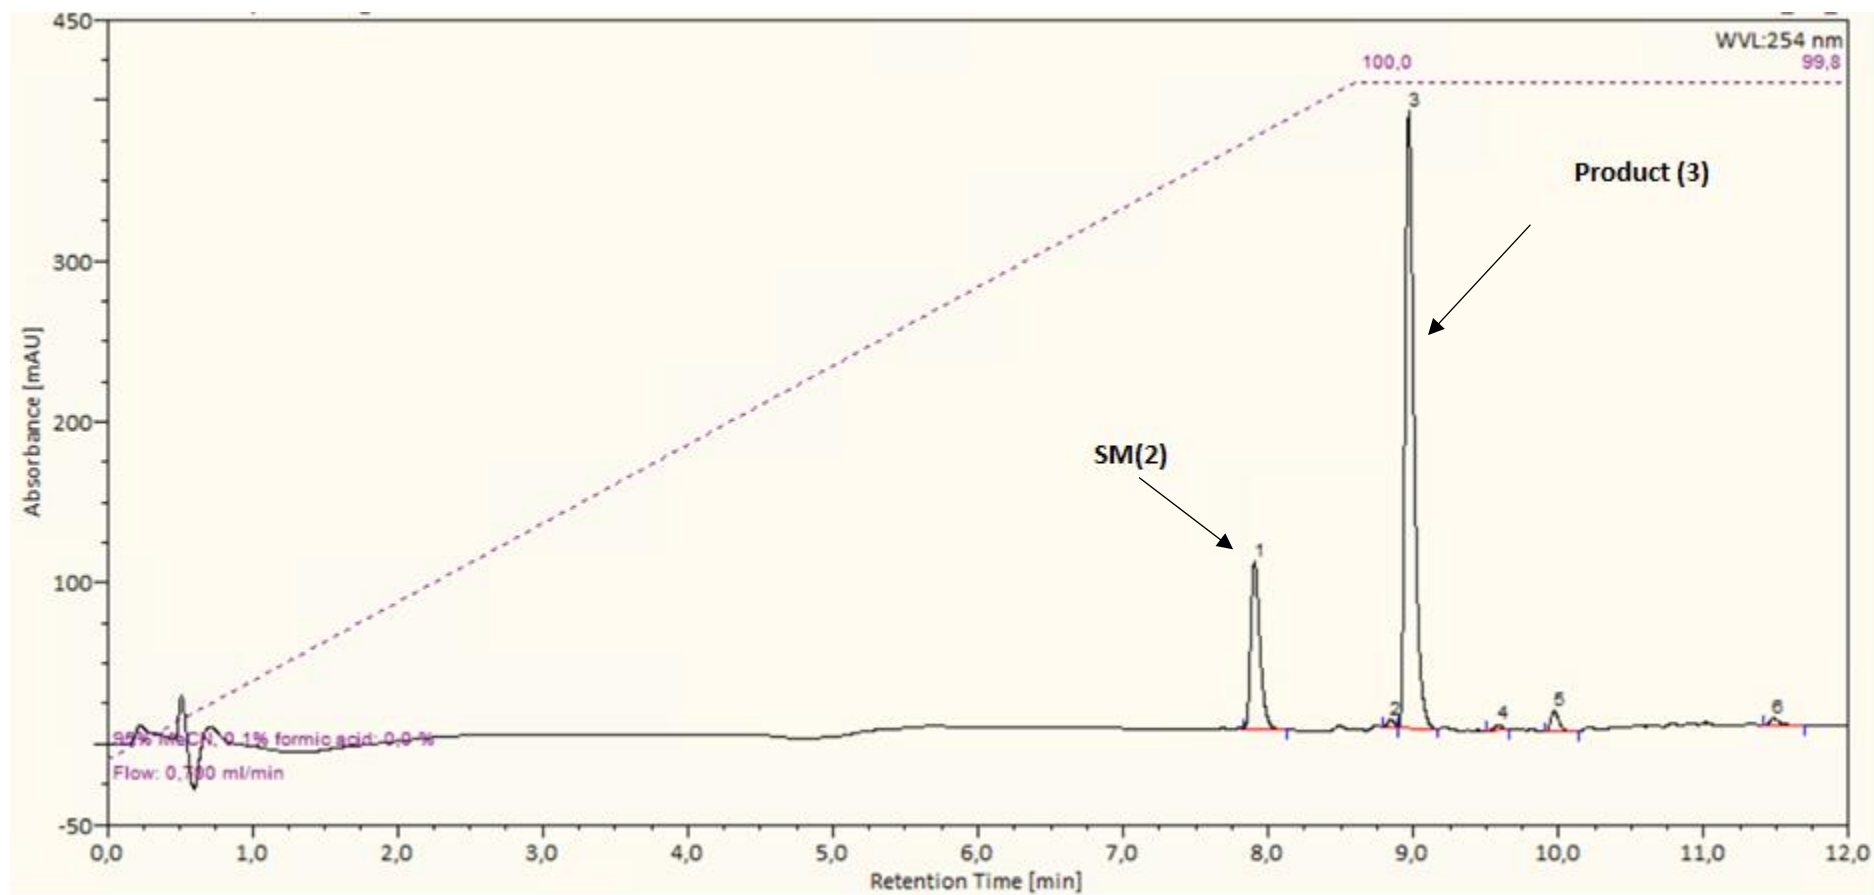

Figure S1. HPLC profile of crude  $N^3$  alkylation reaction on MeU in 50 g scale after 5.5 h.

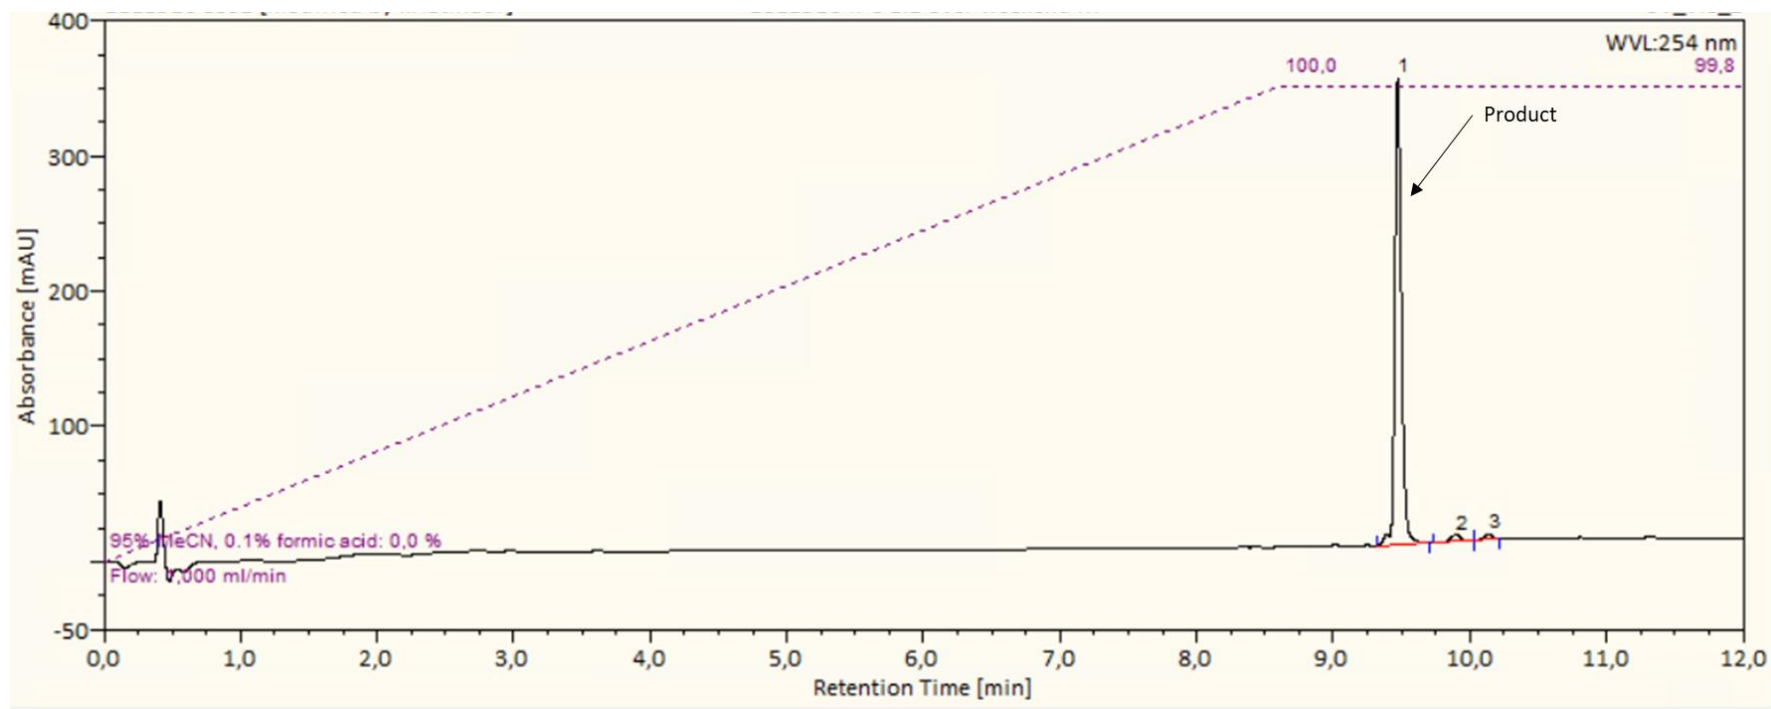

Figure S2. RP-HPLC profile of PTC screen reaction for 2'-OH alkylation of compound **3** using  $K_2CO_3$  as a base and heptane as a solvent on C18 column (Waters XBridge® Oligonucleotide BEH C18 (4.6 x 50 mm)) with a linear gradient from 0-100% of buffer B in buffer A over 12 min at 40 °C. Buffer A: 0.1 M triethylammonium acetate (aq.), buffer B: MeCN+10% (v/v) buffer A.

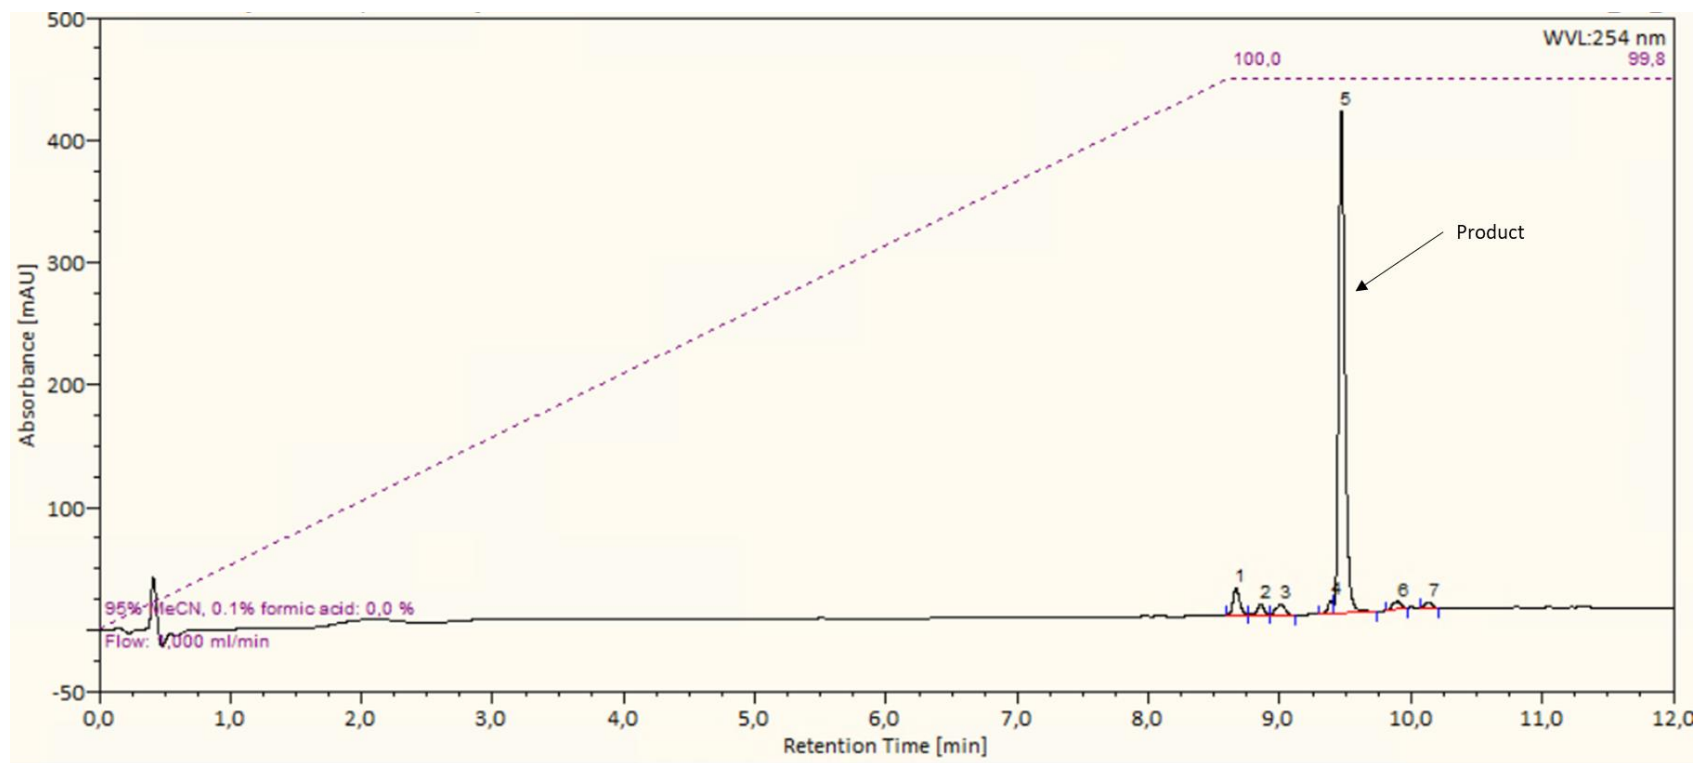

Figure S3. RP-HPLC profile of PTC screen reaction for 2'-OH alkylation of compound **3** using  $K_2CO_3$  as a base and MeCN as a solvent on C18 column (Waters XBridge® Oligonucleotide BEH C18 (4.6 x 50 mm)) with a linear gradient from 0-100% of buffer B in buffer A over 12 min at 40 °C. Buffer A: 0.1 M triethylammonium acetate (aq.), buffer B: MeCN+10% (v/v) buffer A.

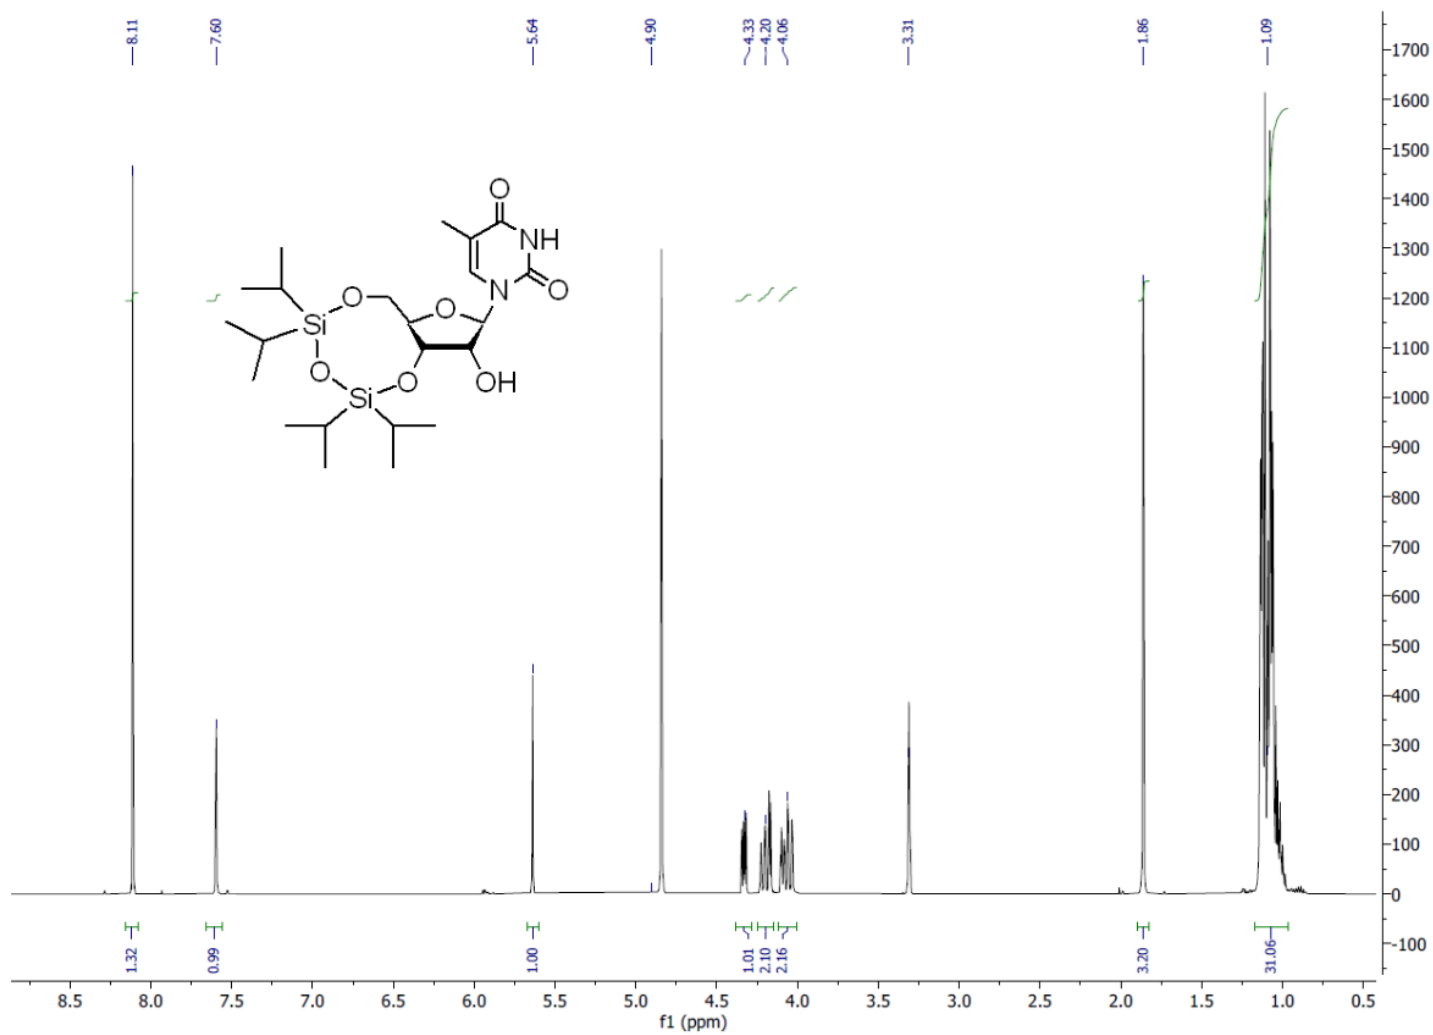

Figure S4. <sup>1</sup>H NMR assay of compound **1** (500 MHz, CD<sub>3</sub>OD). 1,2,4,5-Tetrachloro-3-nitrobenzene ( $\delta=8.11$ ) was used as an internal standard.



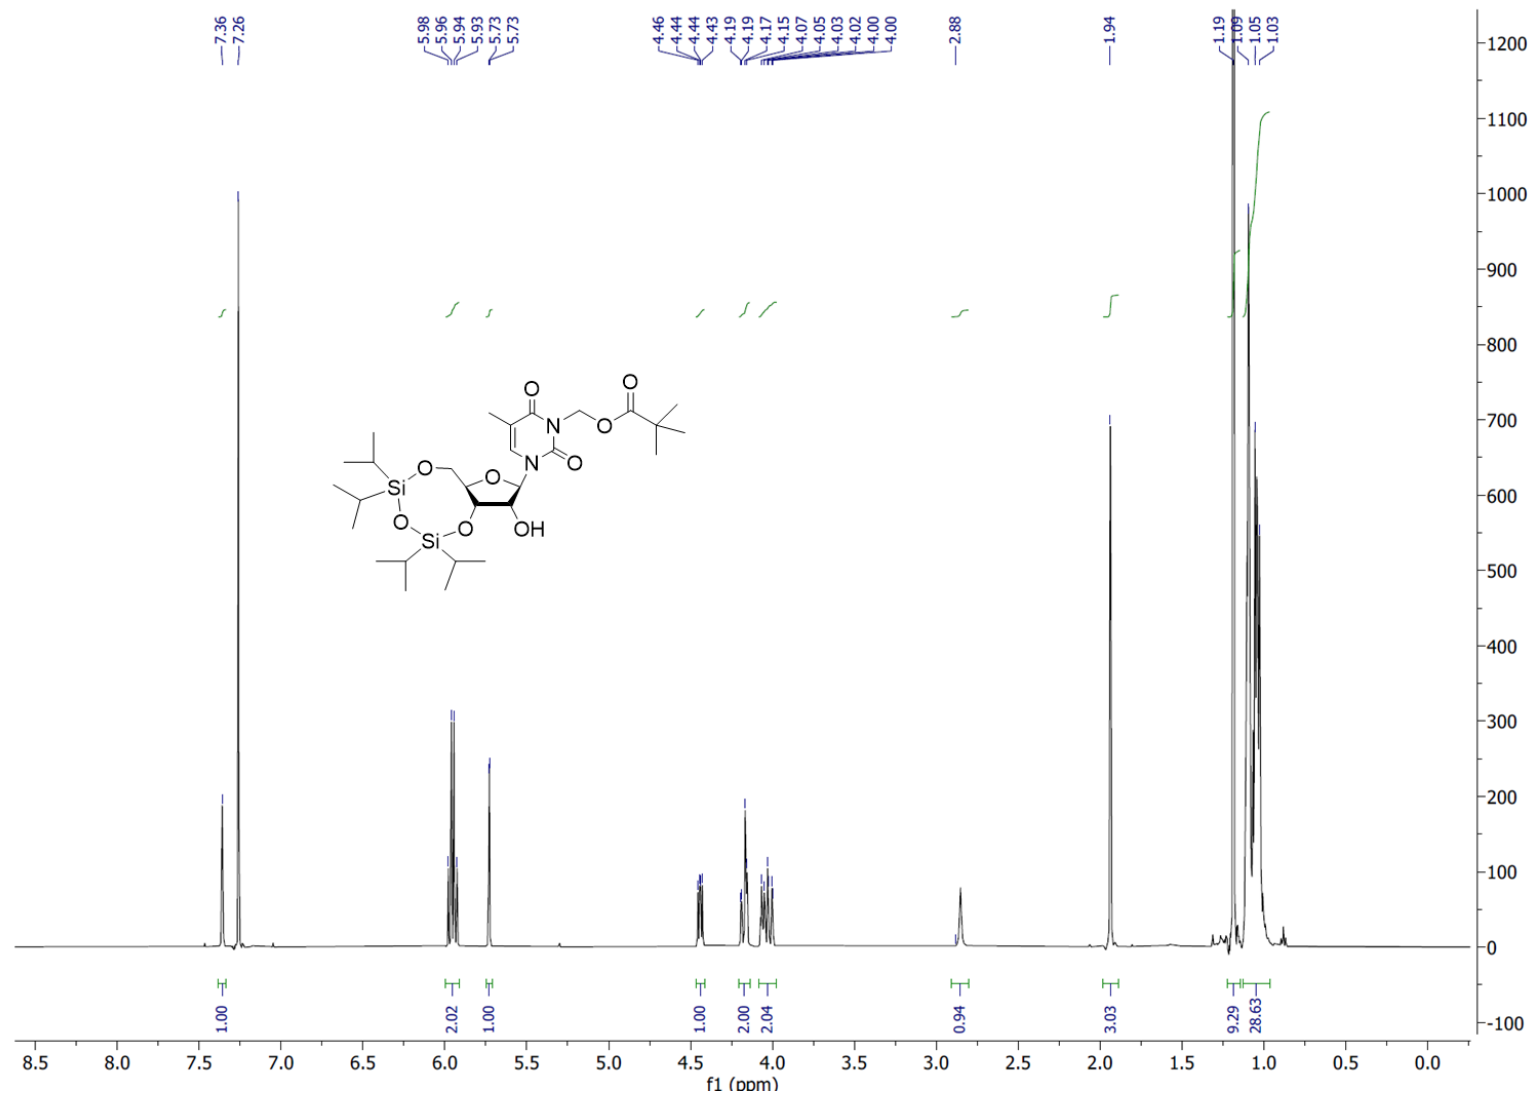

Figure S5. <sup>1</sup>H NMR spectrum of compound 2 (500 MHz, CDCl<sub>3</sub>).

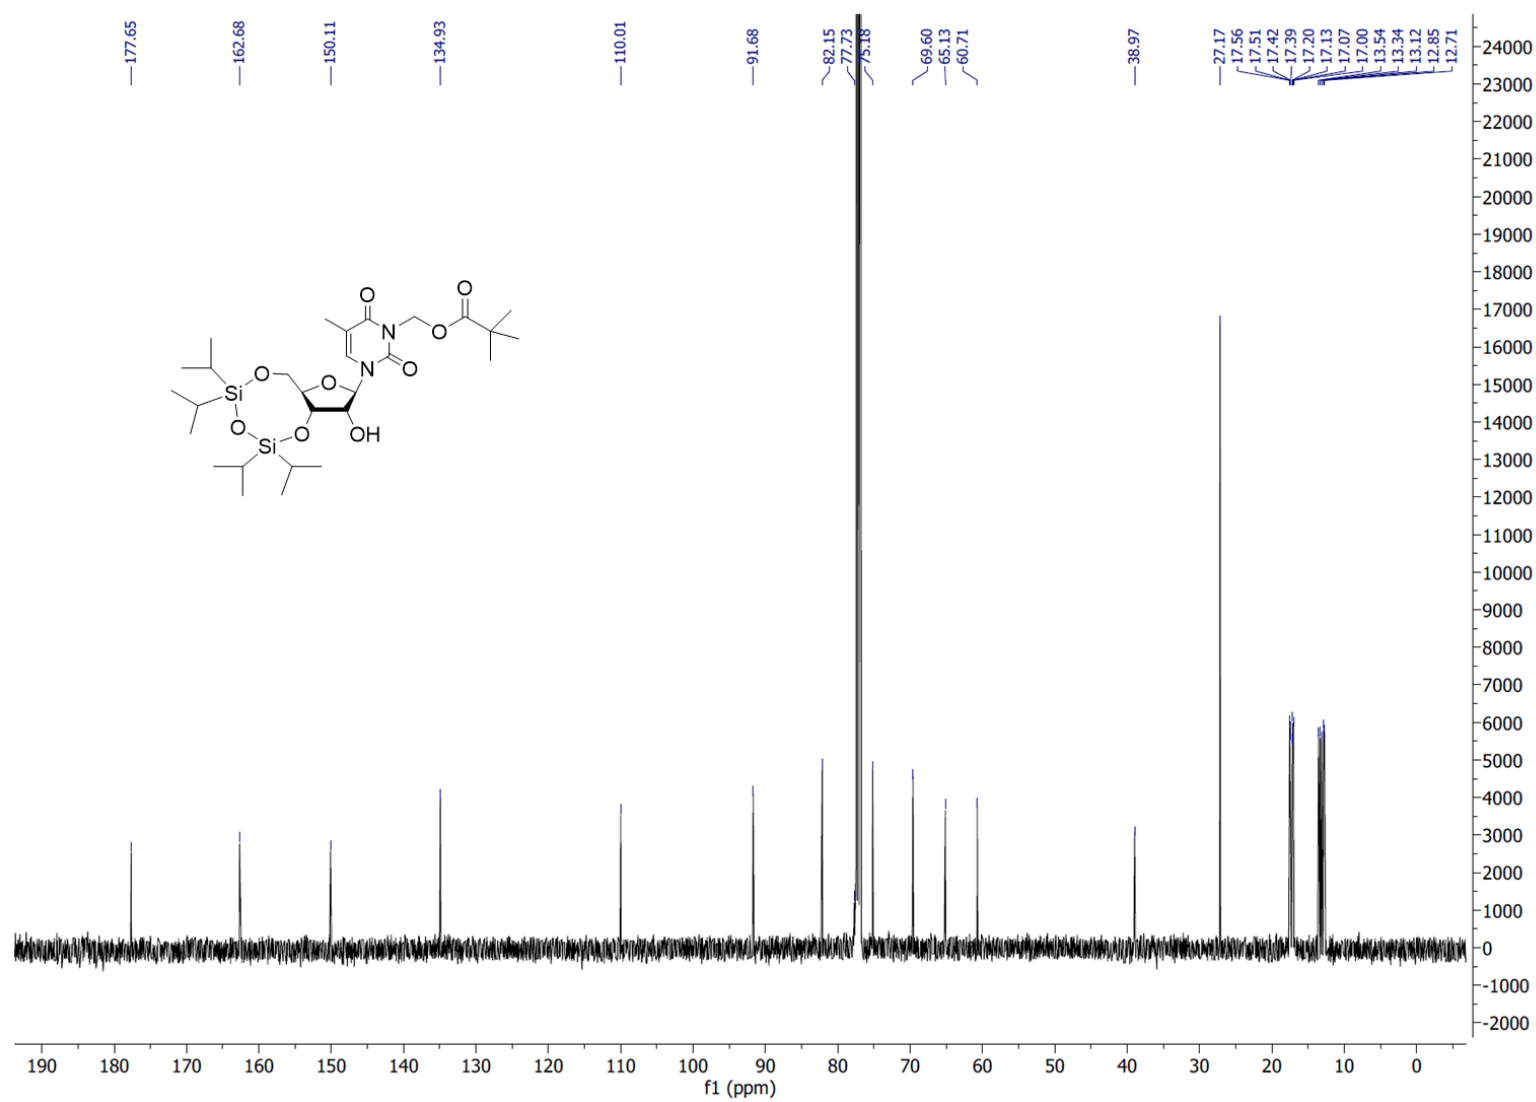

Figure S6. <sup>13</sup>C NMR spectrum of compound 2 (125.76 MHz, CDCl<sub>3</sub>).

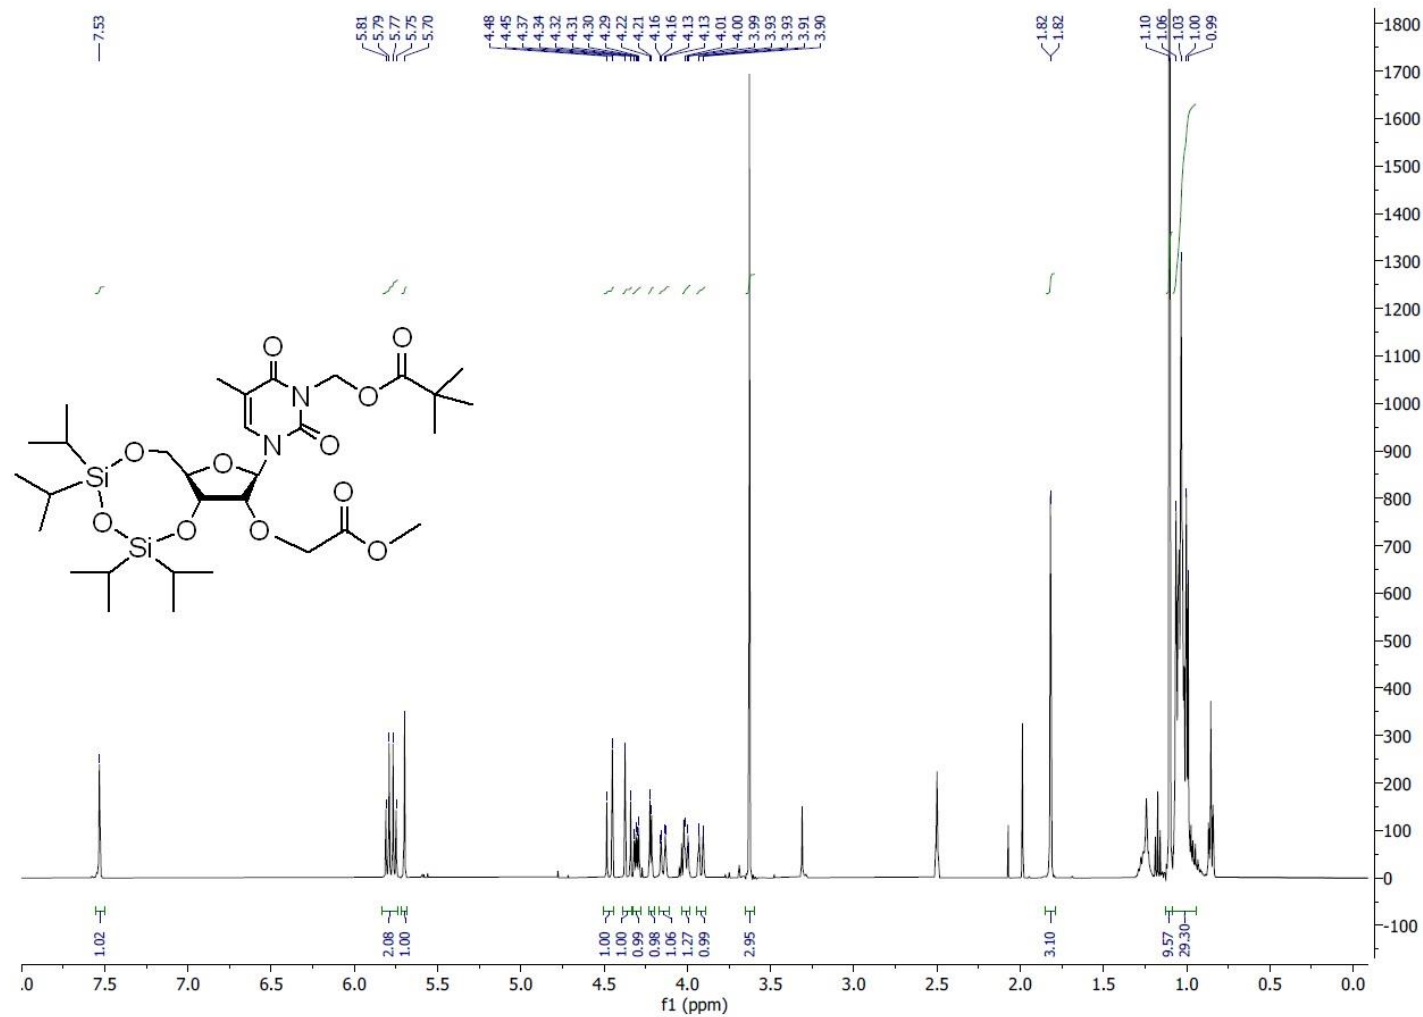

Figure S7. <sup>1</sup>H NMR spectrum of compound **3** (500 MHz, DMSO-d<sub>6</sub>).

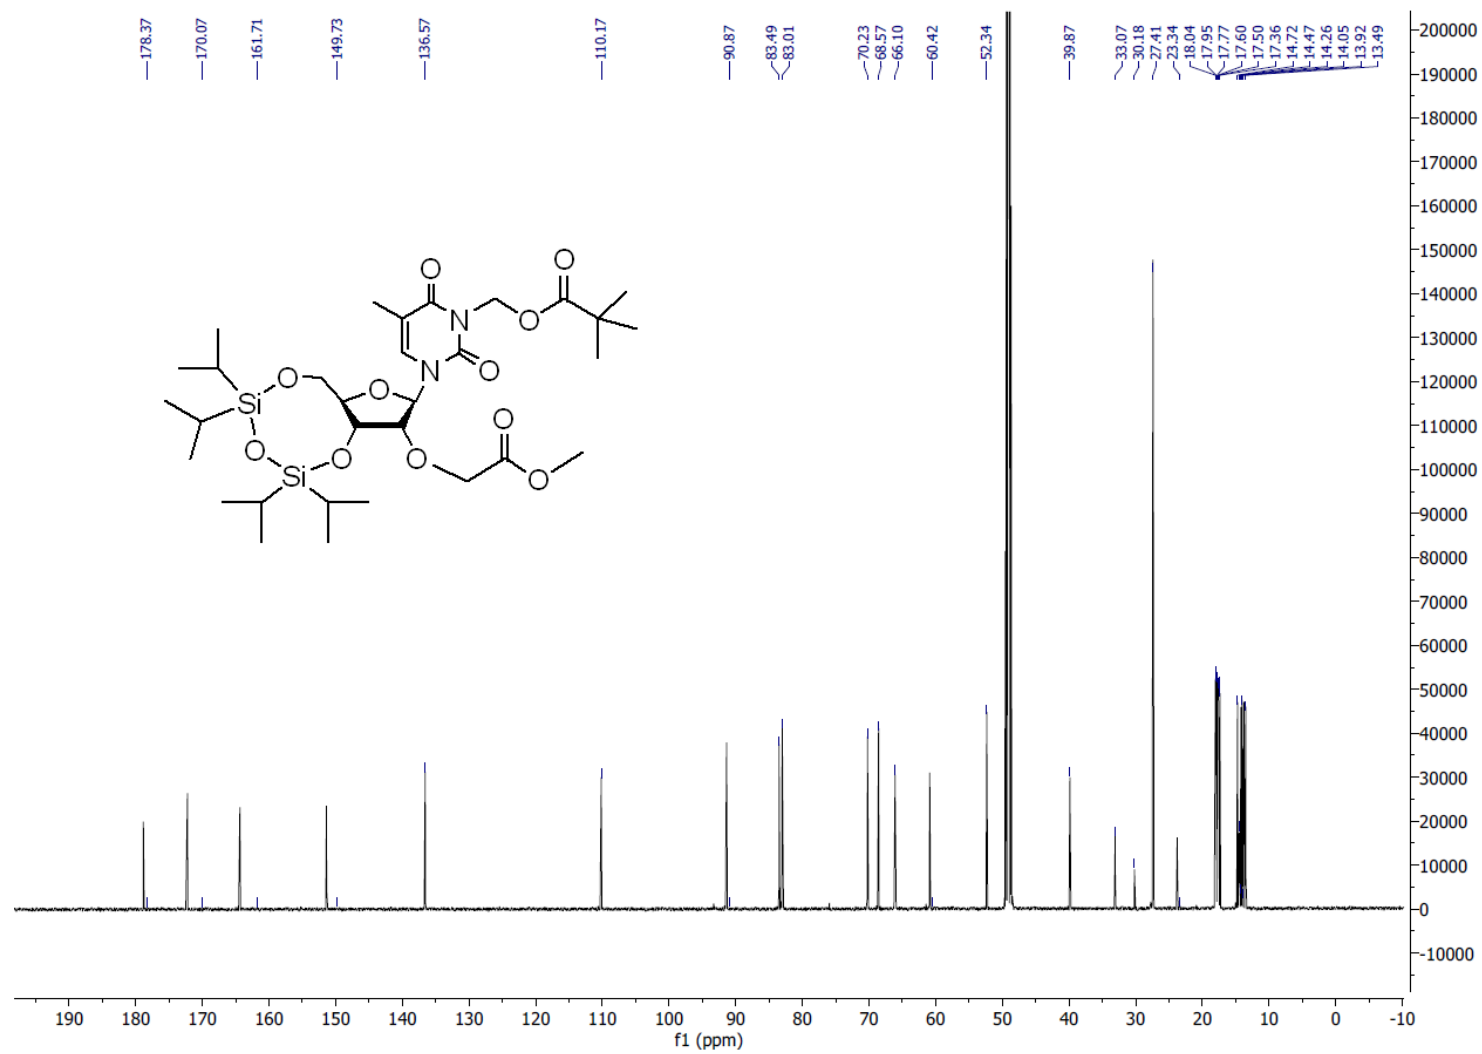

Figure S8. <sup>13</sup>C NMR spectrum of compound 3 (125.76 MHz, CD<sub>3</sub>OD).

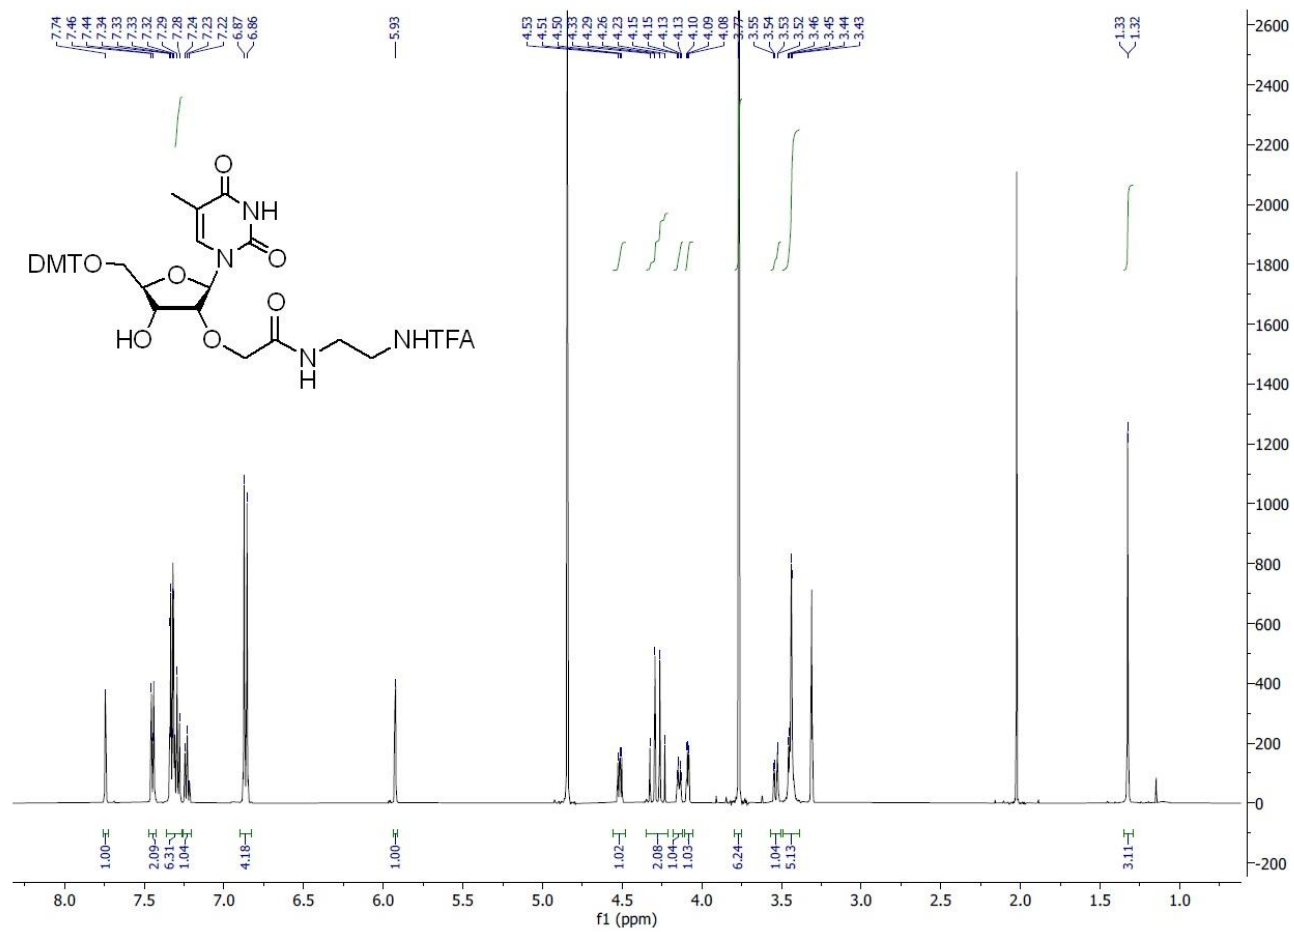

Figure S9. <sup>1</sup>H NMR spectrum of compound 6 (500 MHz, CD<sub>3</sub>OD).

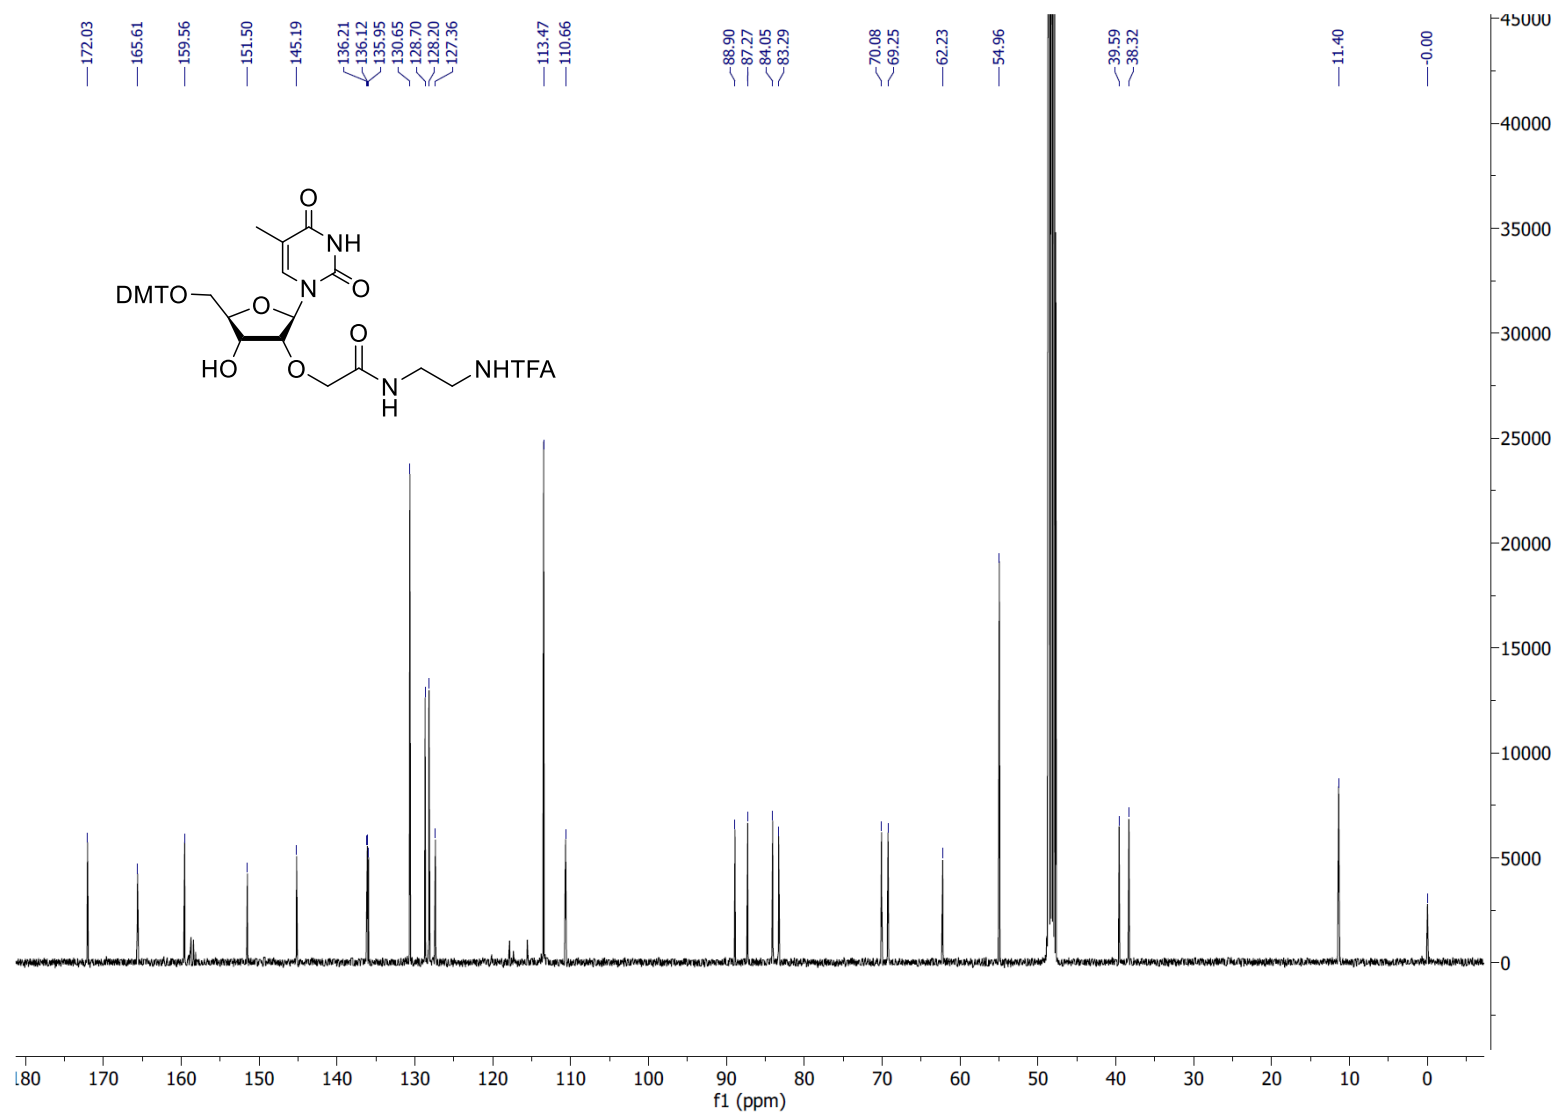

Figure S10. <sup>13</sup>C NMR spectrum of compound 6 (125.76 MHz, CD<sub>3</sub>OD).

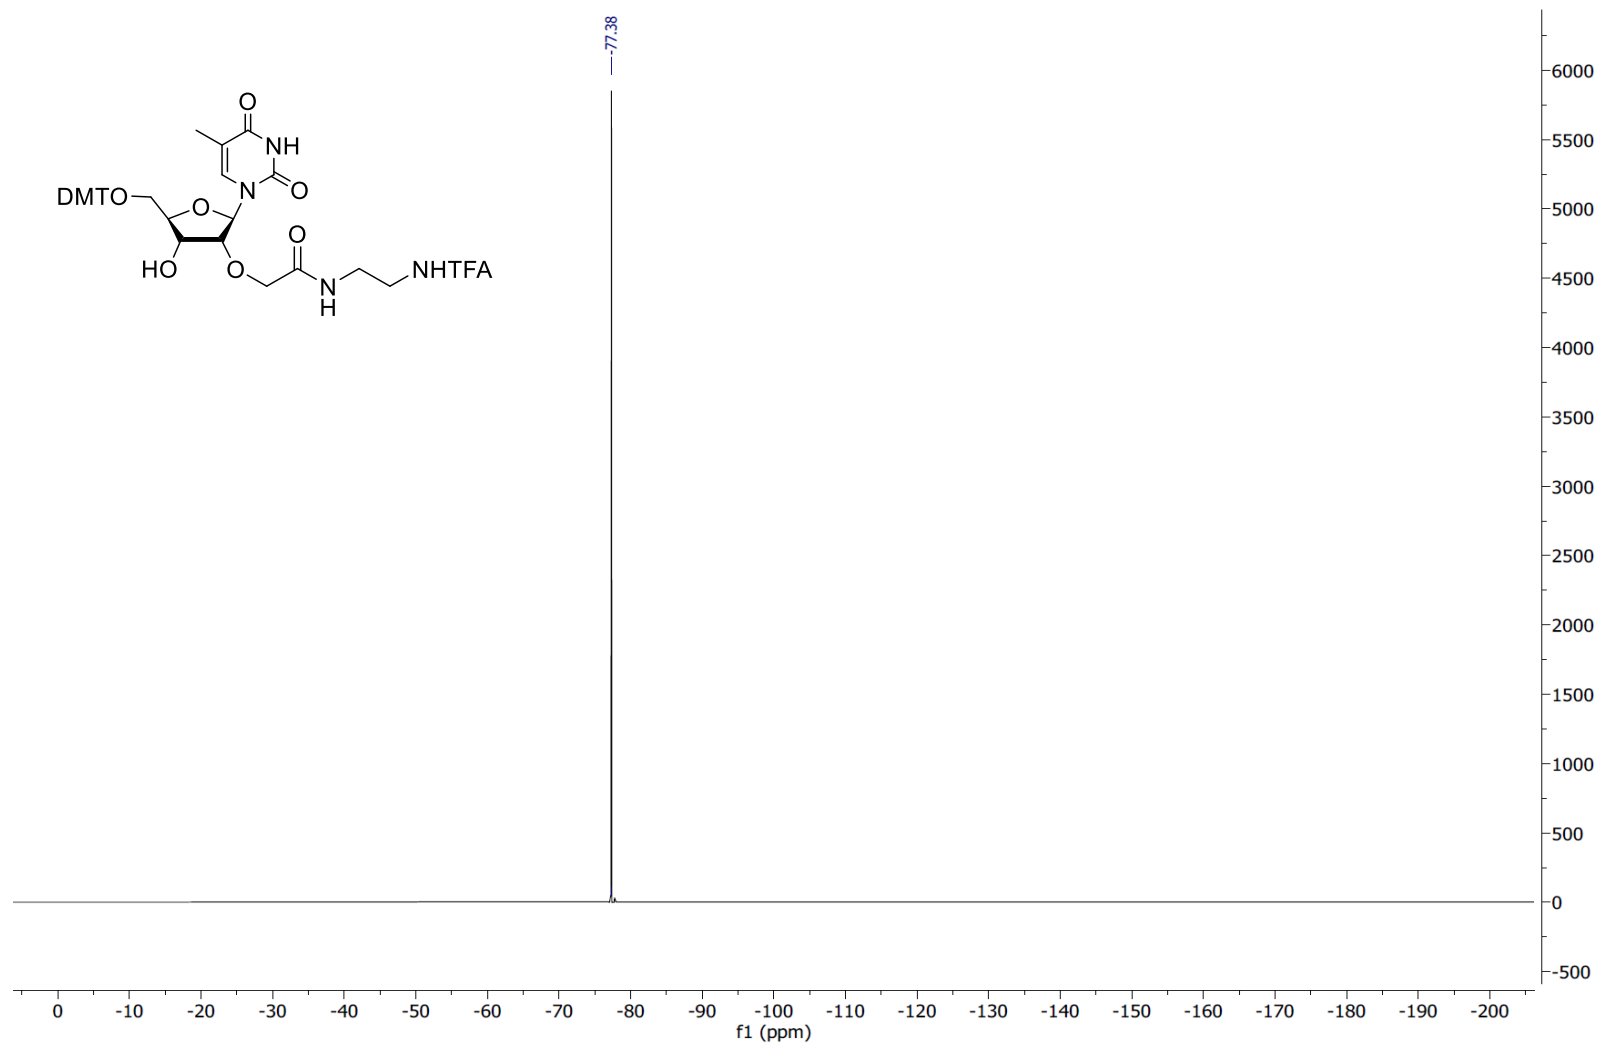

Figure S11.  $^{19}\text{F}$  NMR spectrum of compound **6** (470.56 MHz,  $\text{CD}_3\text{OD}$ ).

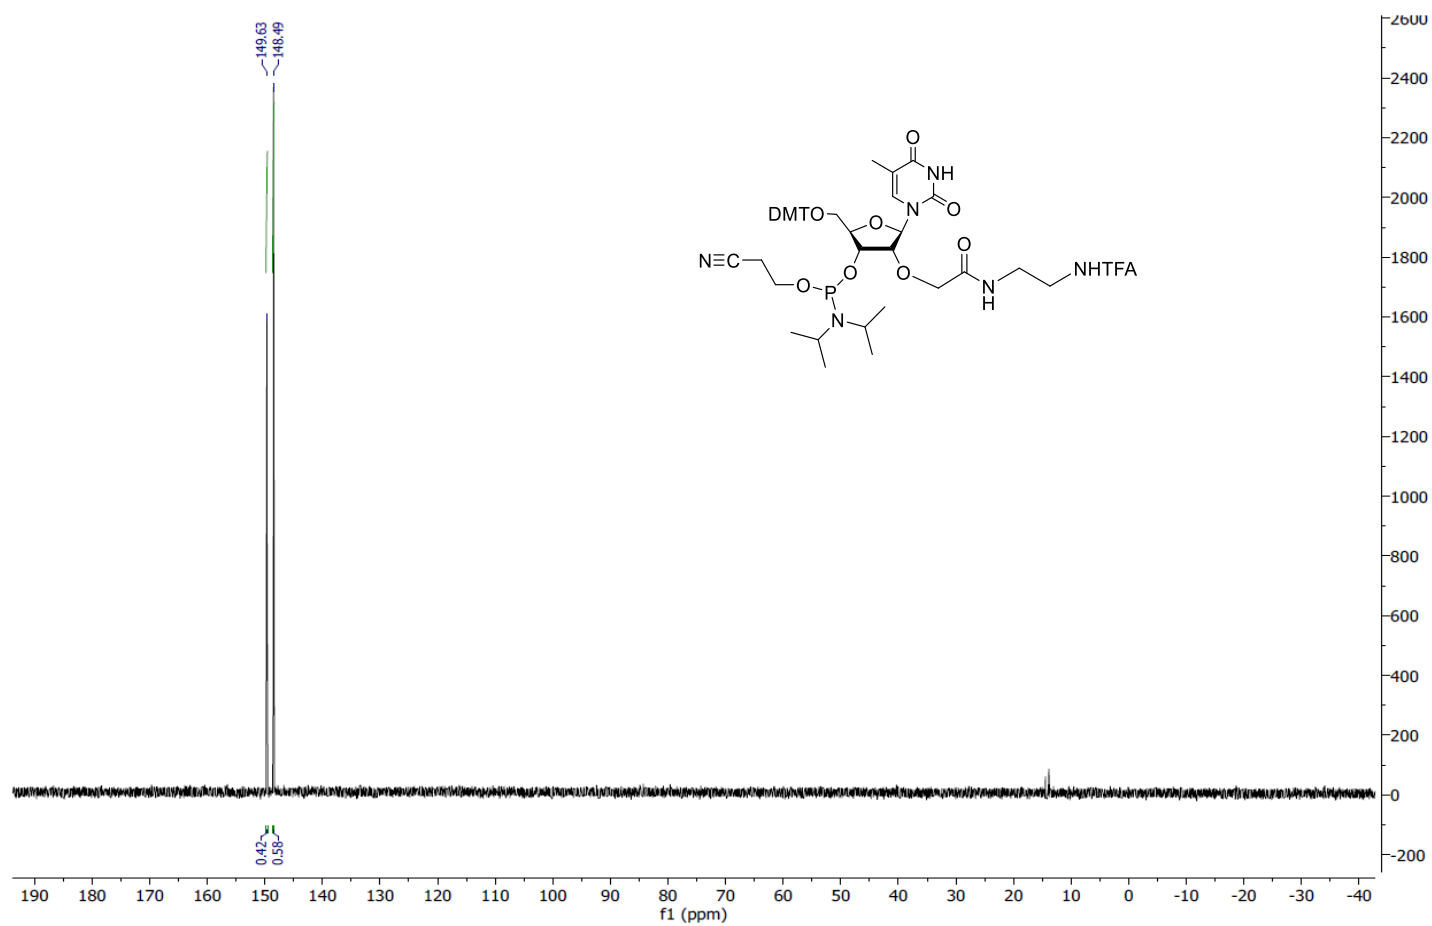

Figure S12.  $^{31}\text{P}$  NMR spectrum of compound 7 (202.47 MHz,  $\text{CD}_3\text{CN}$ ).



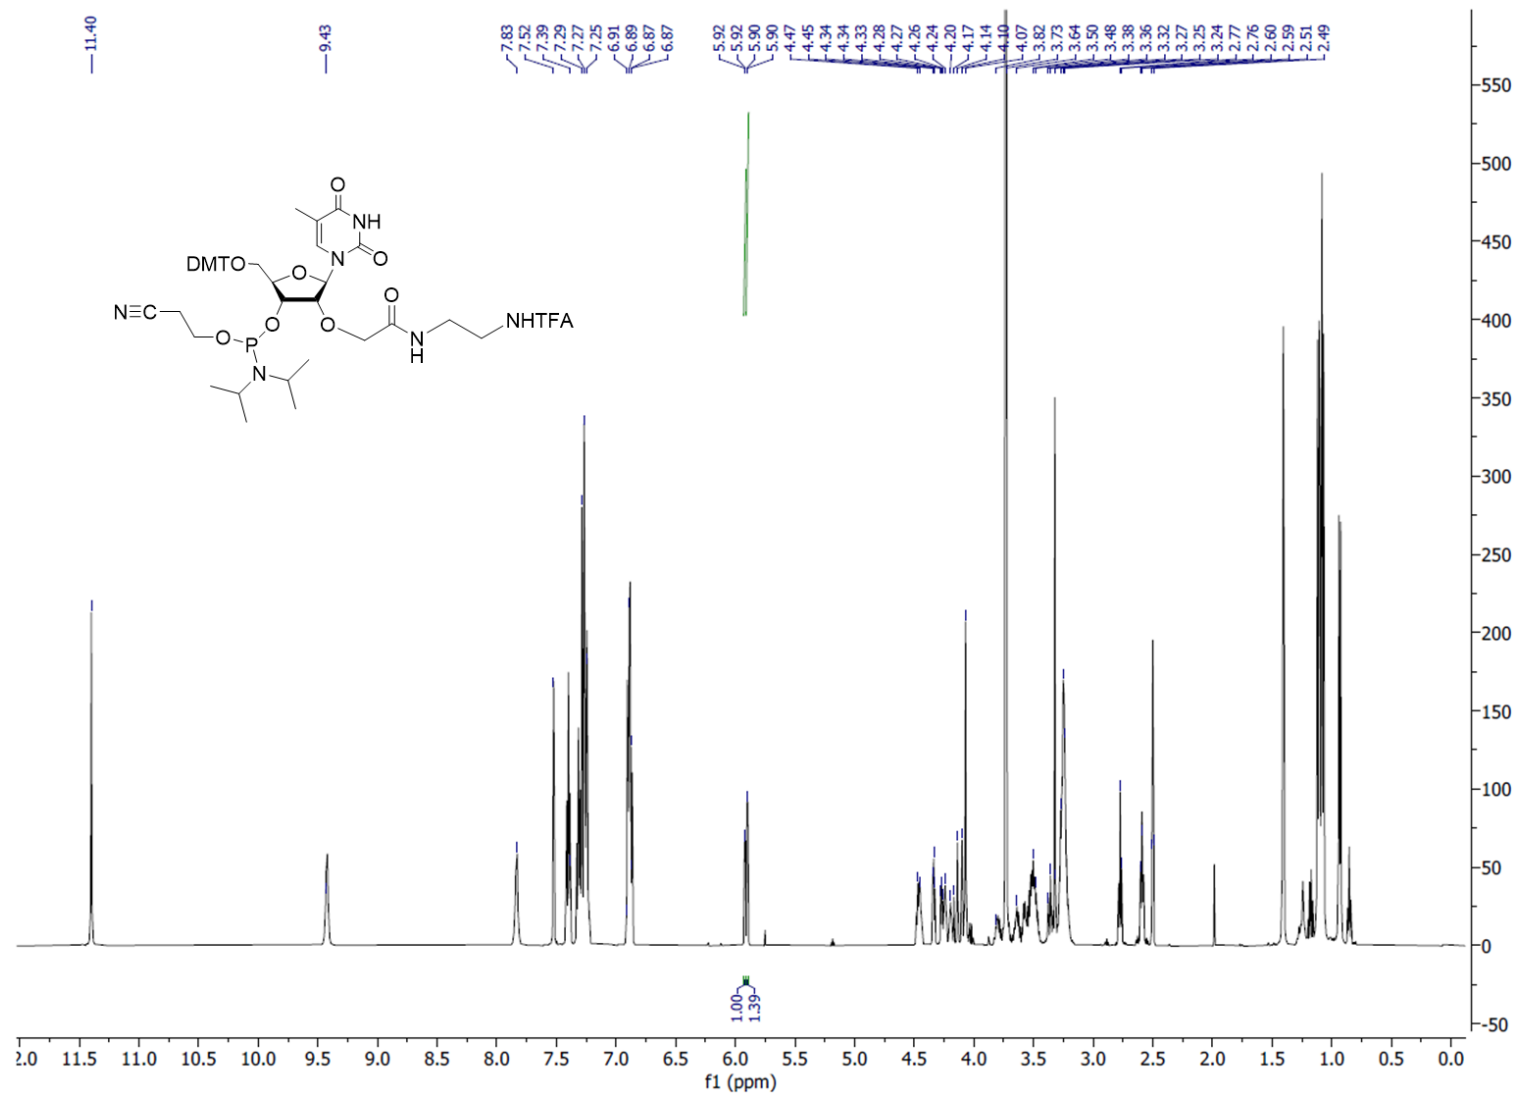

Figure S13. <sup>1</sup>H NMR spectrum of compound 7 (500 MHz, DMSO-d<sub>6</sub>).

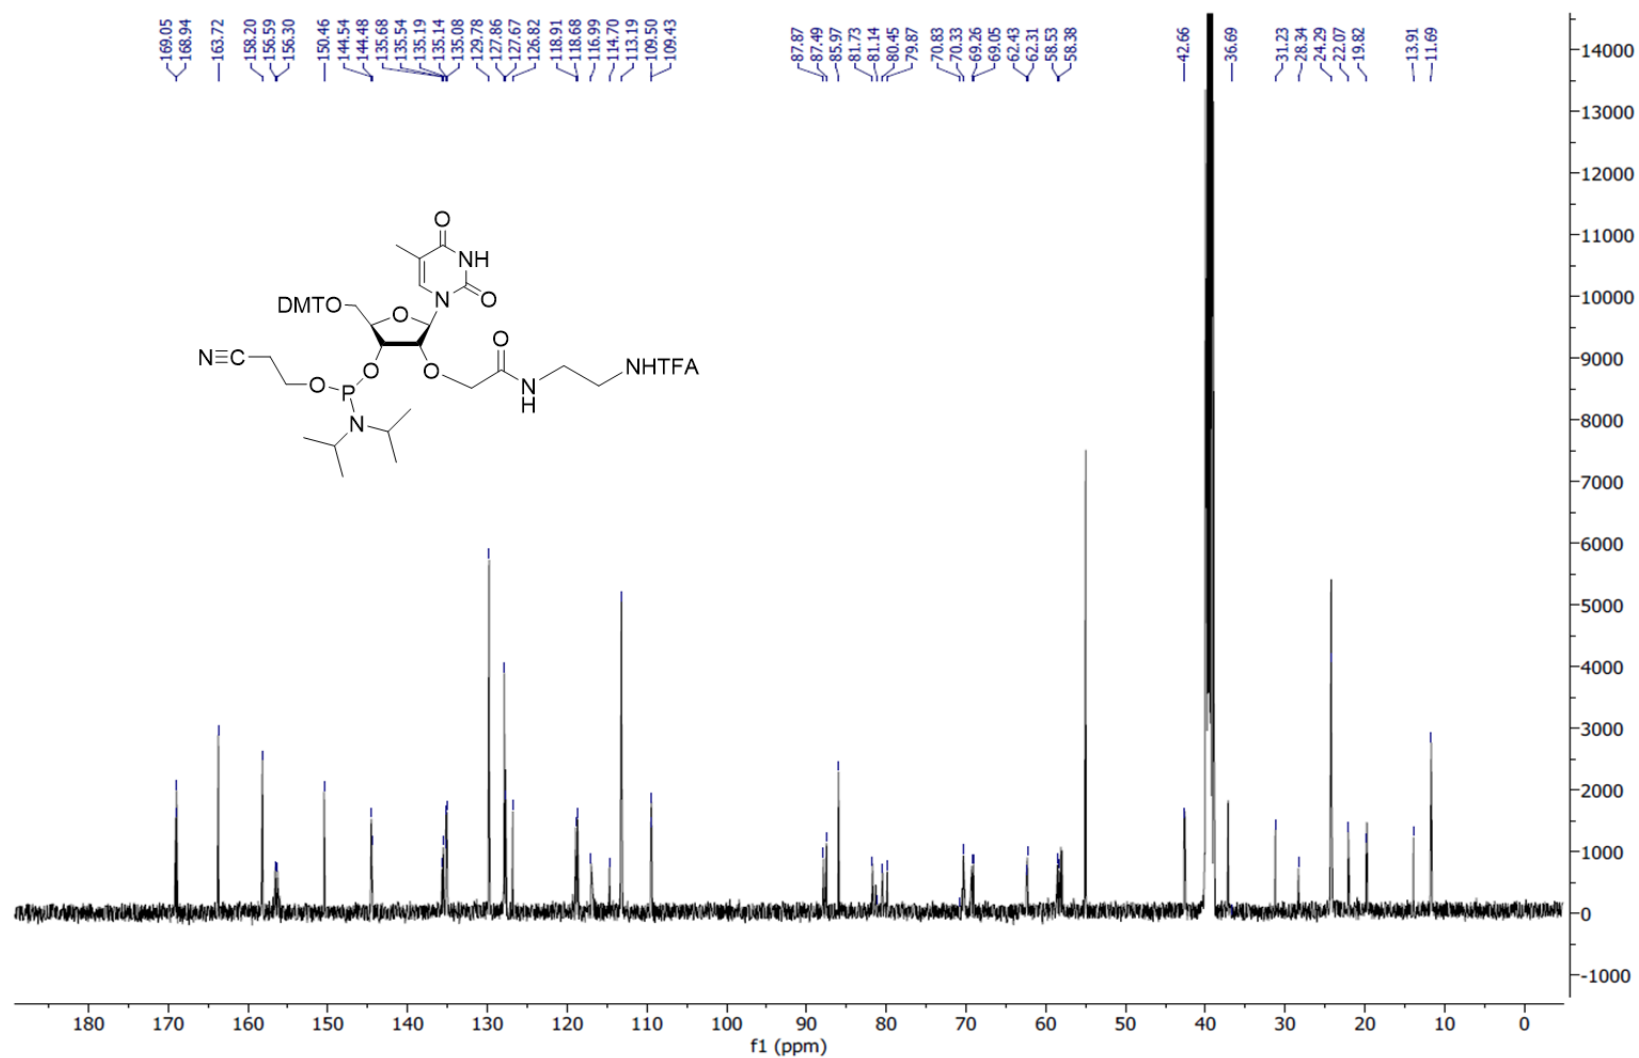

Figure S14. <sup>13</sup>C NMR spectrum of compound 7 (125.76 MHz, DMSO-d<sub>6</sub>).

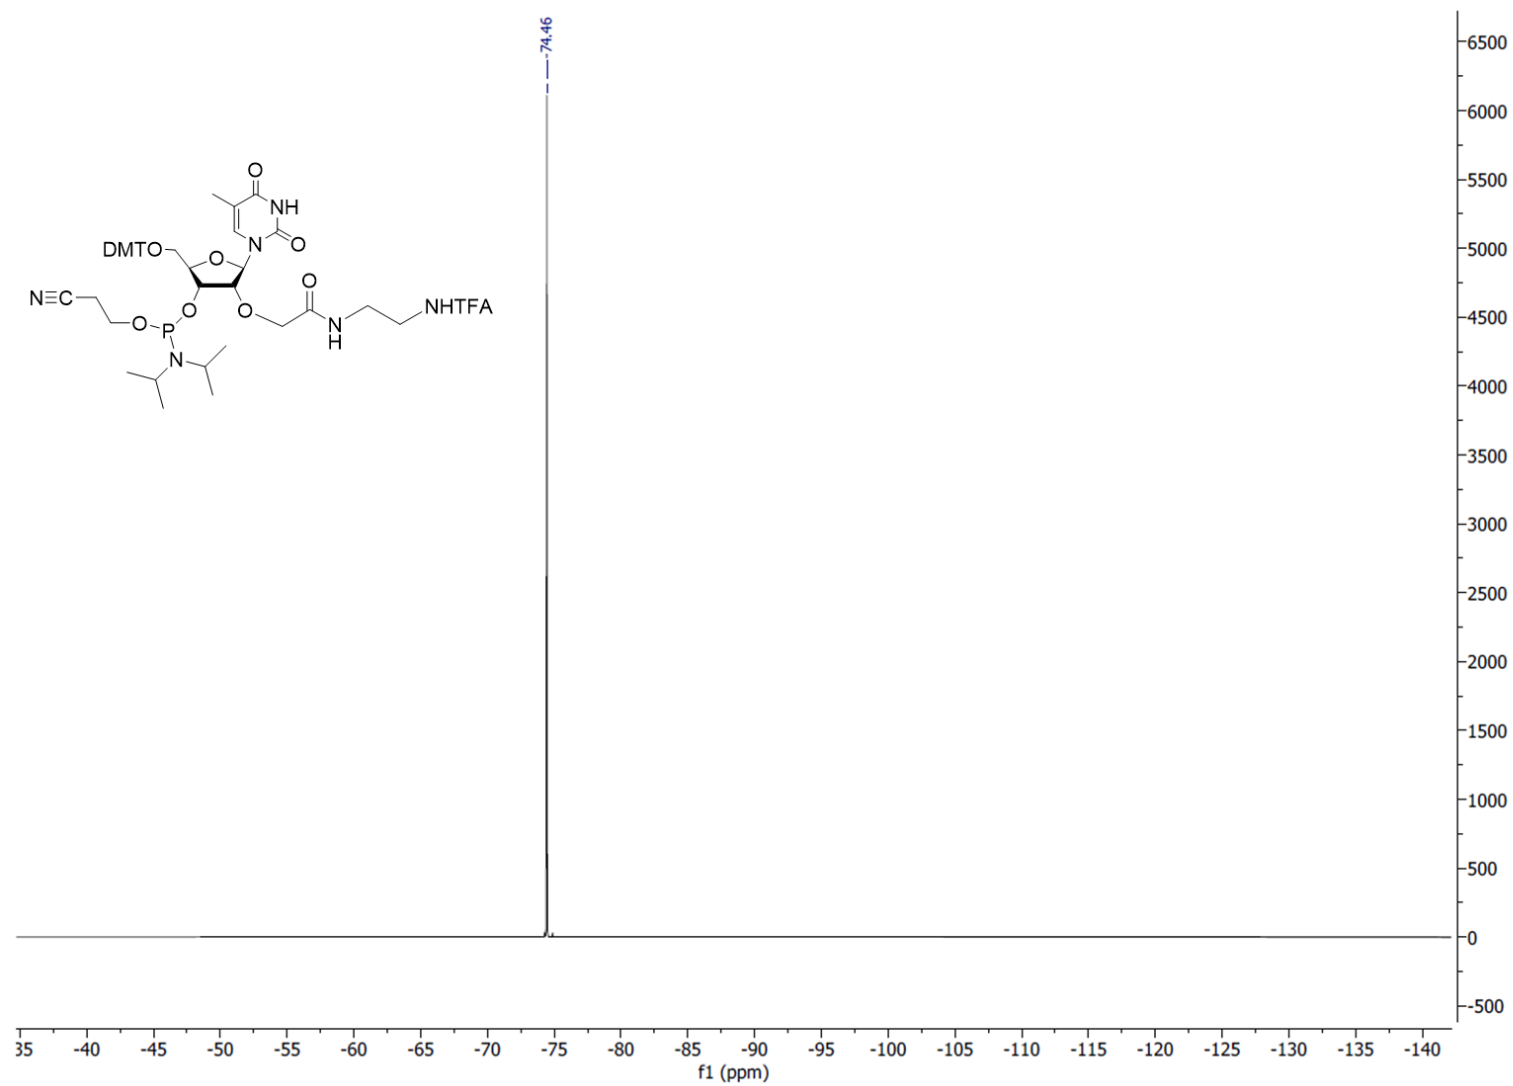

Figure S15.  $^{19}\text{F}$  NMR spectrum of compound 7 (470.56 MHz,  $\text{DMSO}-d_6$ ).

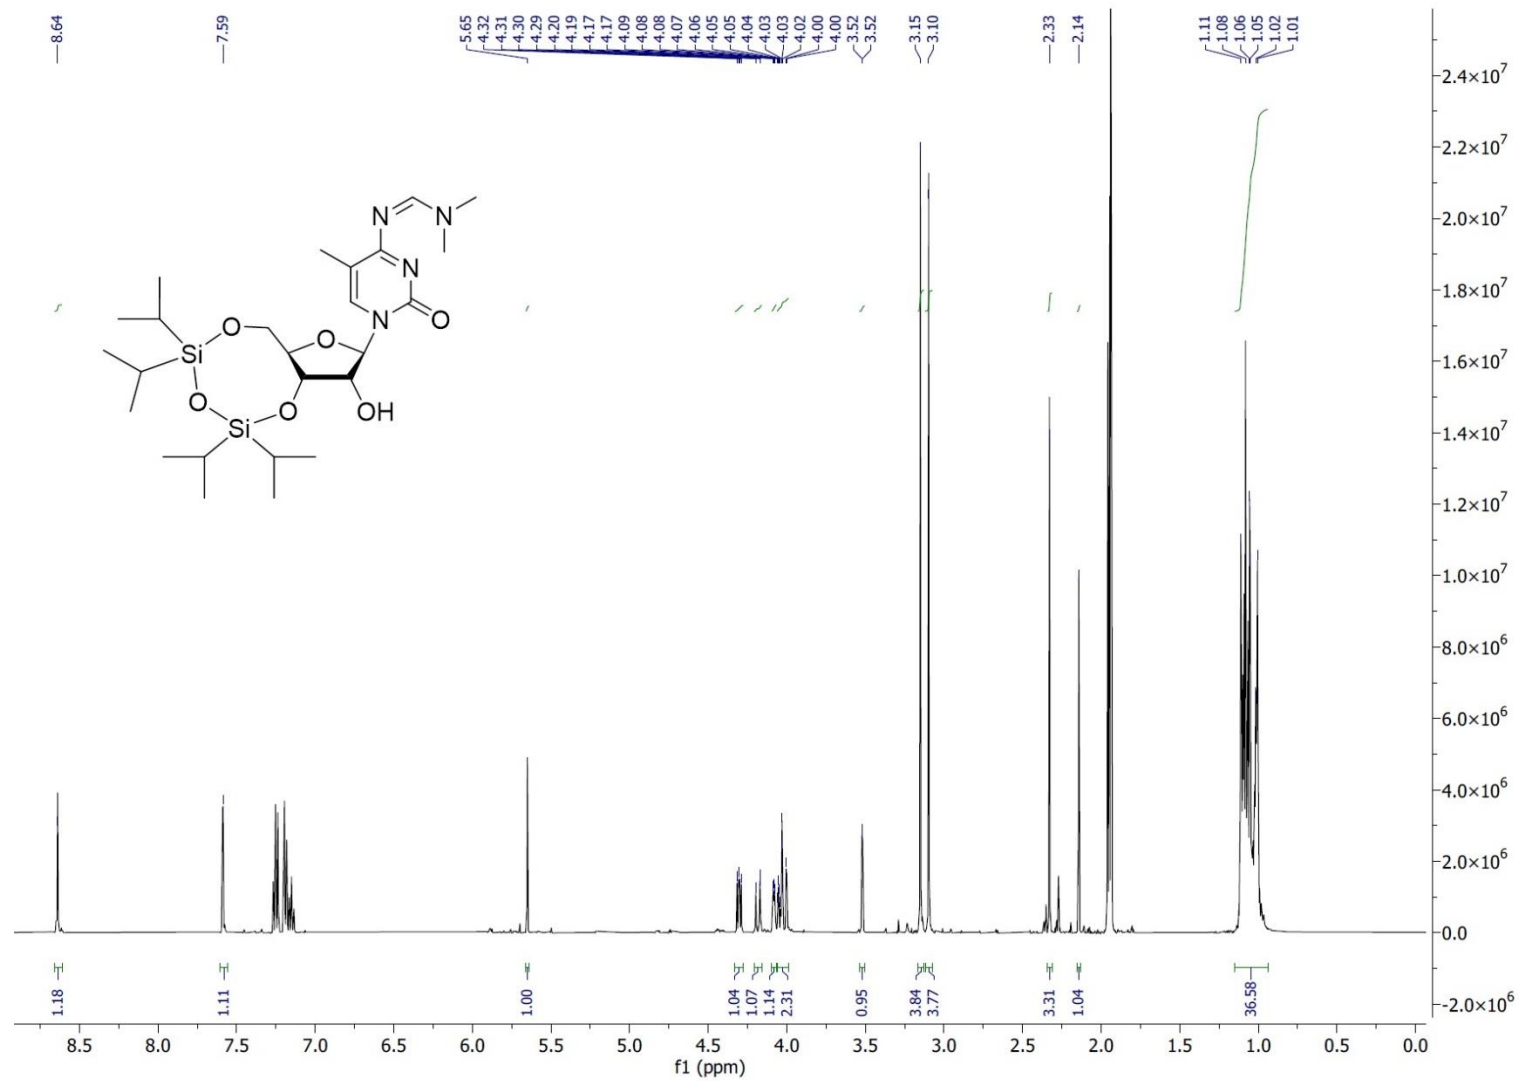

Figure S16.  $^1\text{H}$  NMR spectrum of crude compound 9 (500 MHz,  $\text{CD}_3\text{CN}$ ).

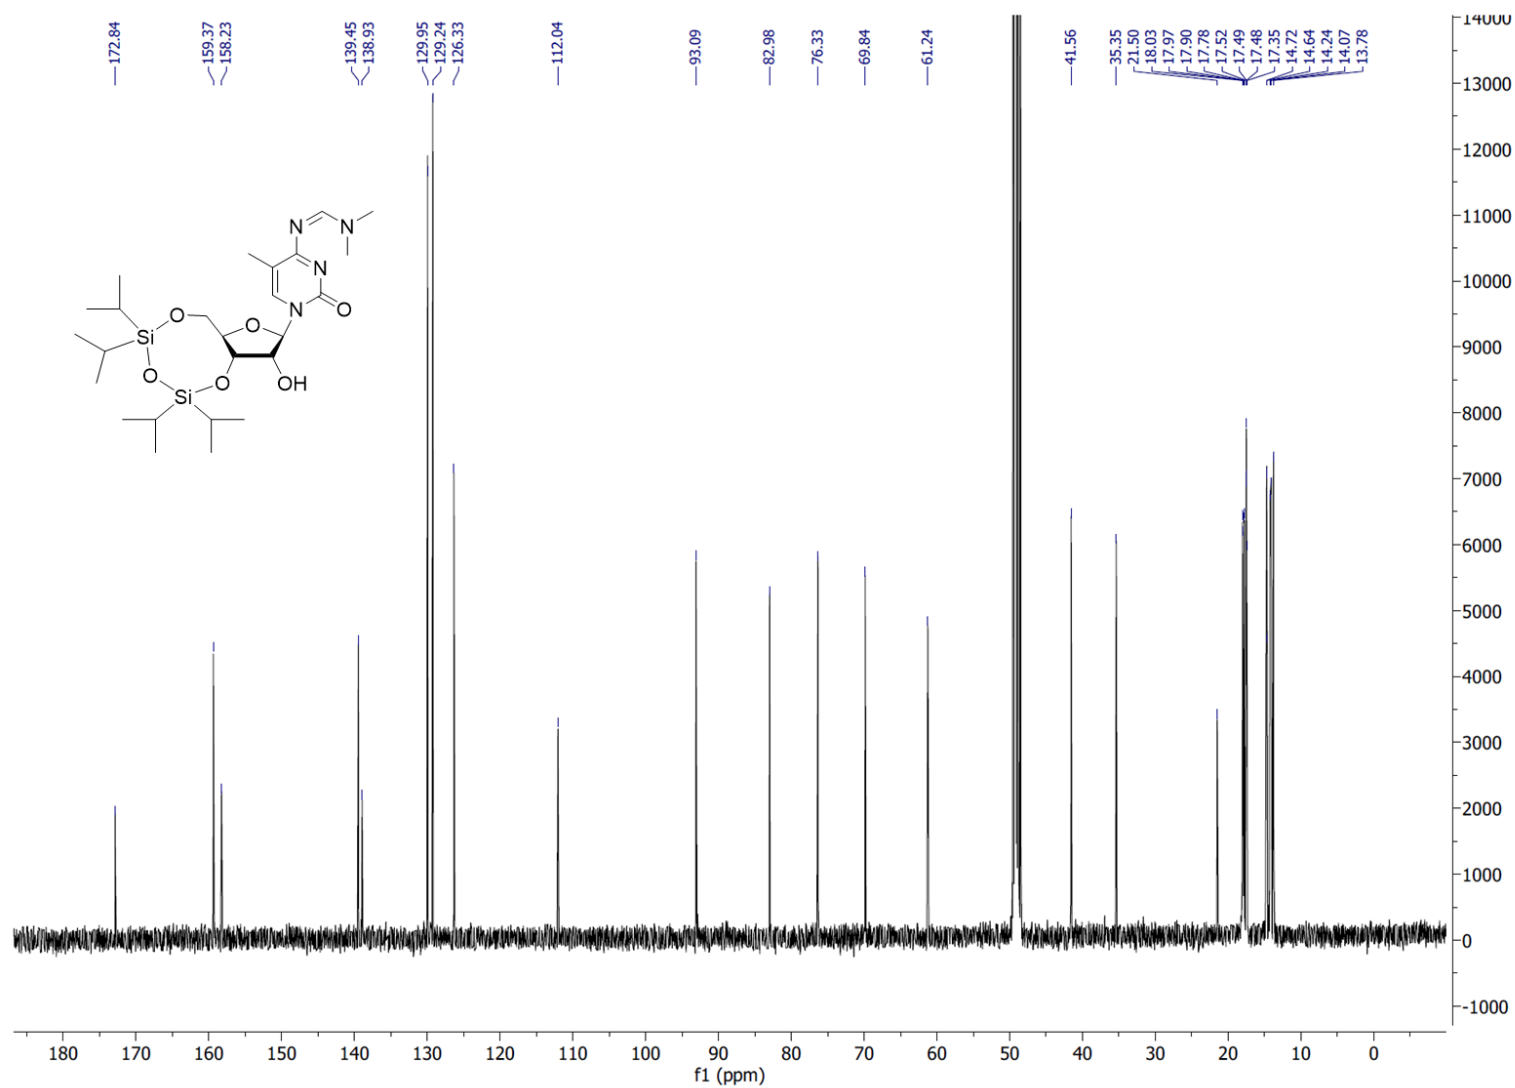

Figure S17. <sup>13</sup>C NMR spectrum of crude compound 9 (125.76 MHz, CD<sub>3</sub>OD).

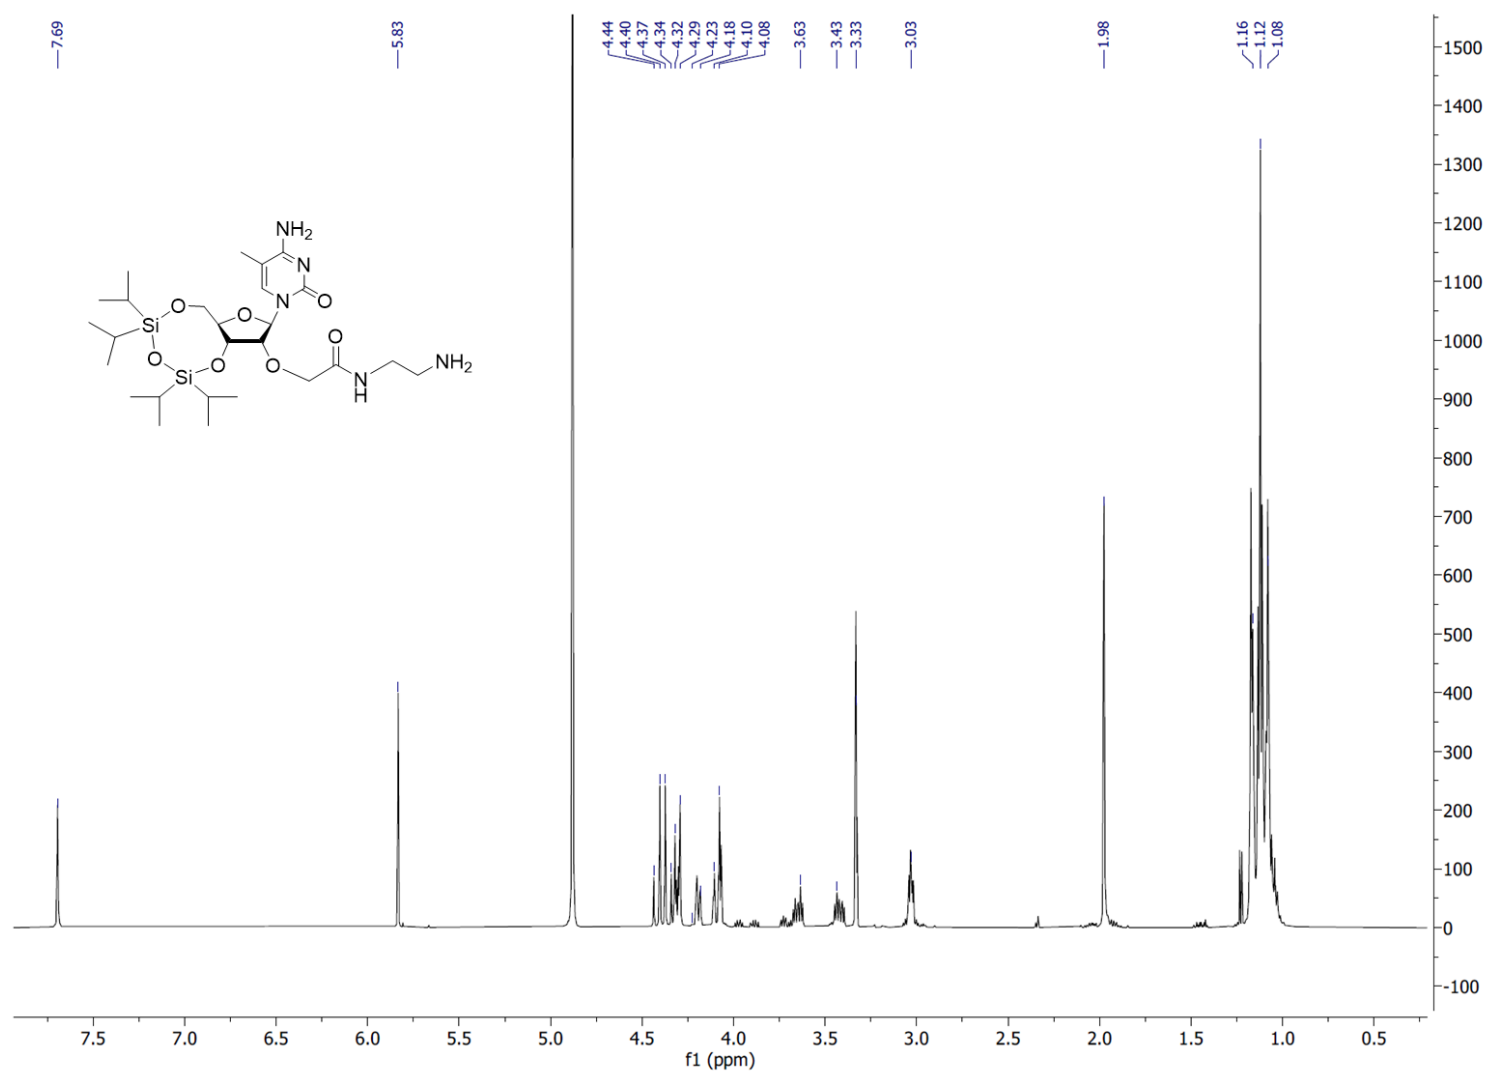

Figure S18.  $^1\text{H}$  NMR spectrum of crude compound **11** (500 MHz,  $\text{CD}_3\text{OD}$ ).

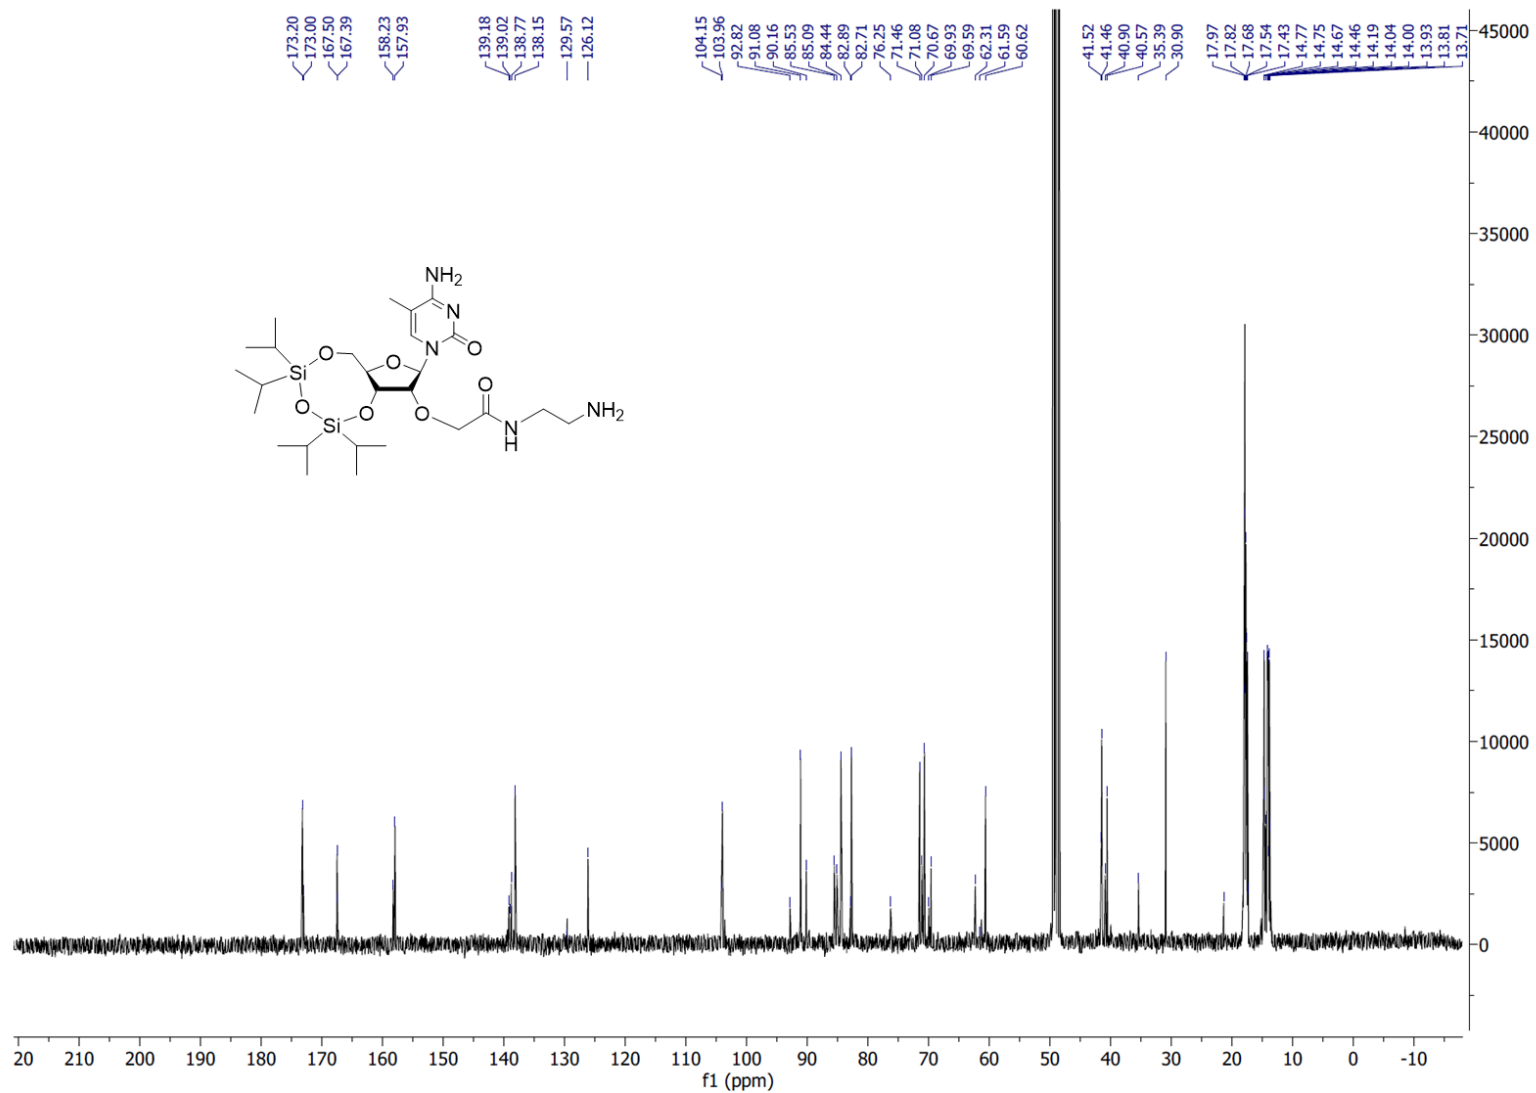

Figure S19. <sup>13</sup>C NMR spectrum of crude compound **11** (125.76 MHz, CD<sub>3</sub>OD).

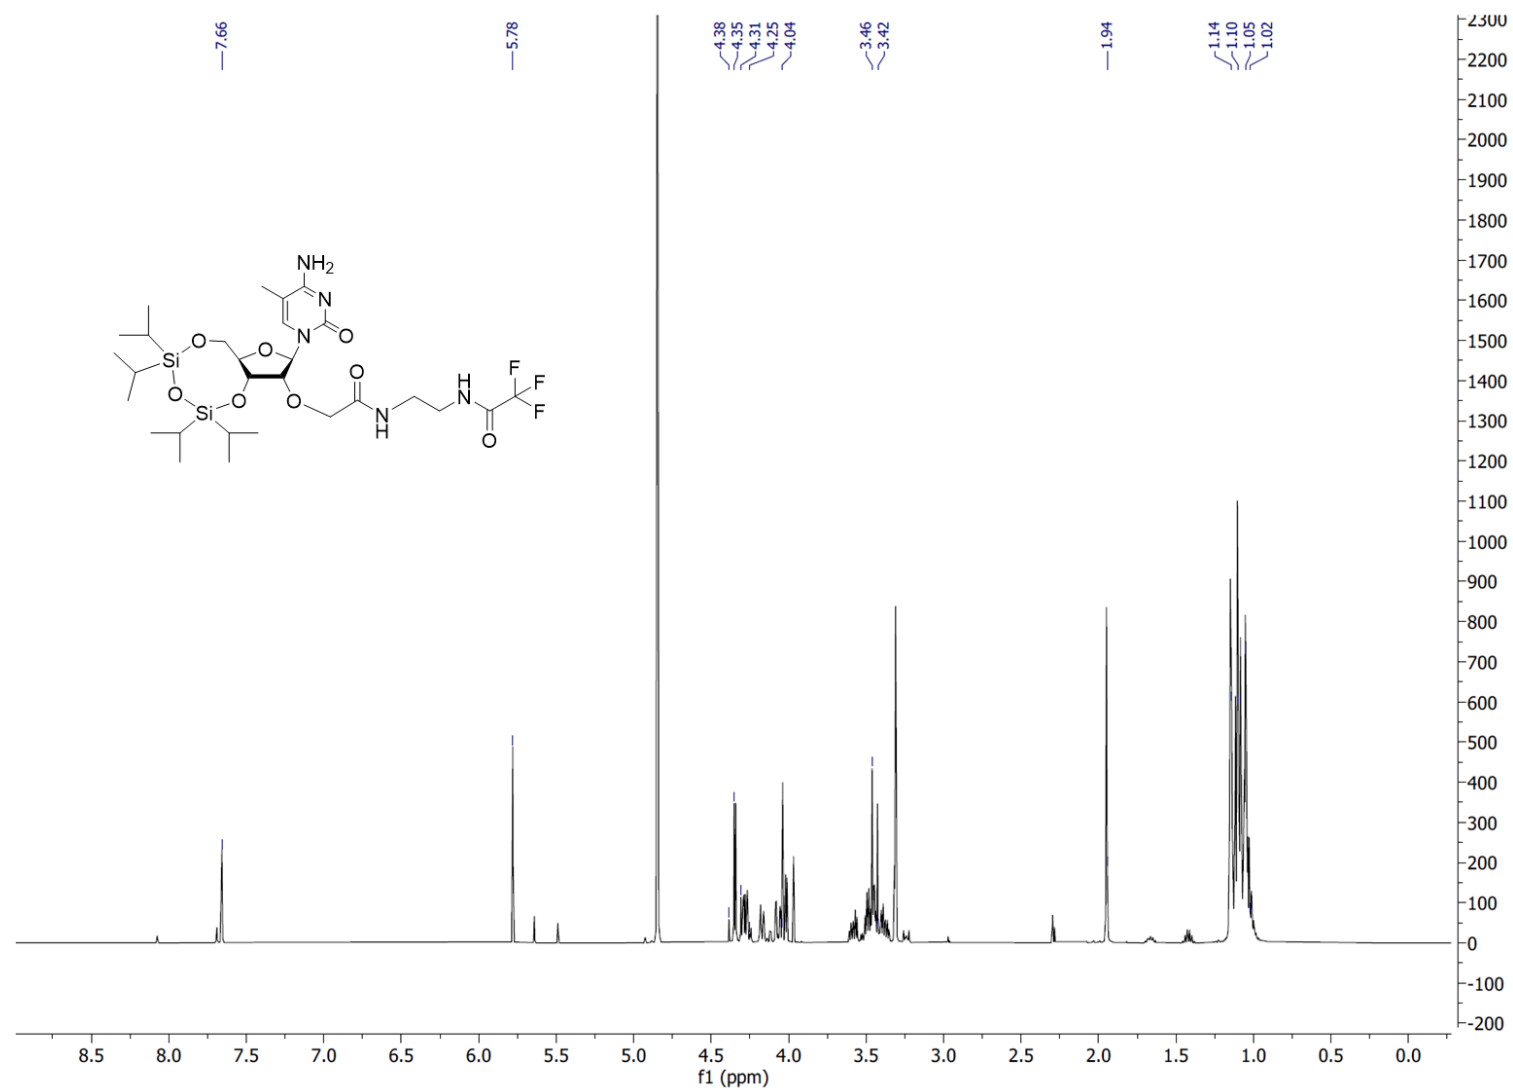

Figure S20. <sup>1</sup>H NMR spectrum of crude compound 12 (500 MHz, CD<sub>3</sub>OD).



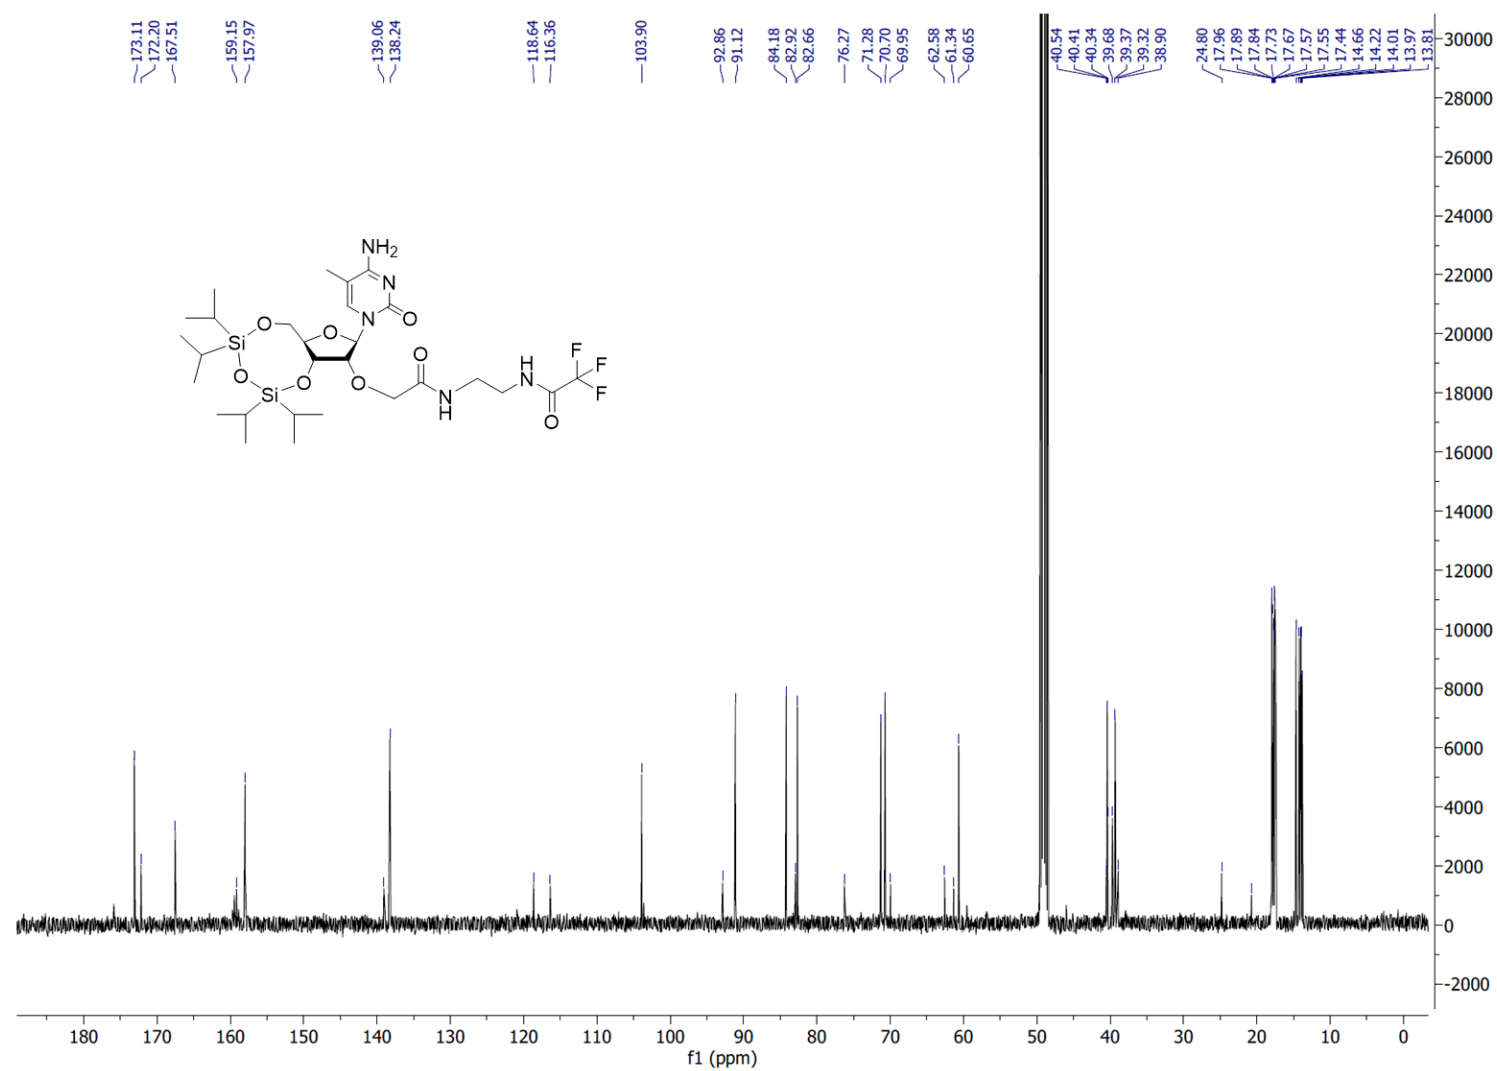

Figure S21. <sup>13</sup>C NMR spectrum of crude compound **12** (125.76 MHz, CD<sub>3</sub>OD).

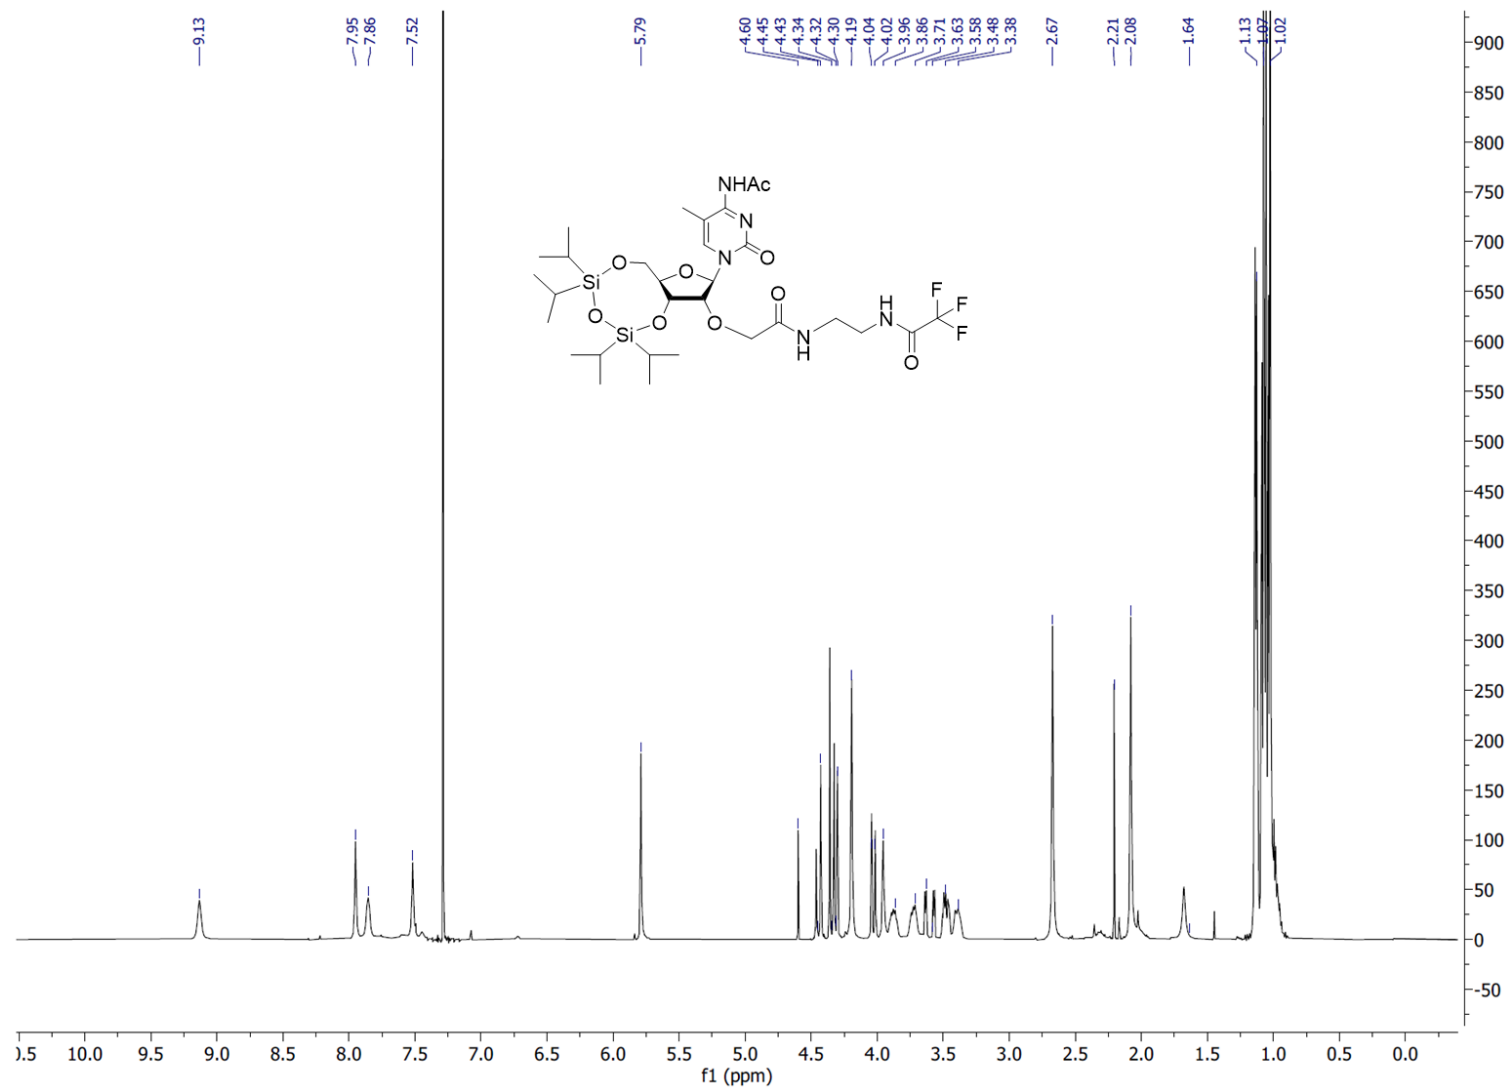

Figure S22.  $^1\text{H}$  NMR spectrum of crude compound **13** (500 MHz,  $\text{CDCl}_3$ ).

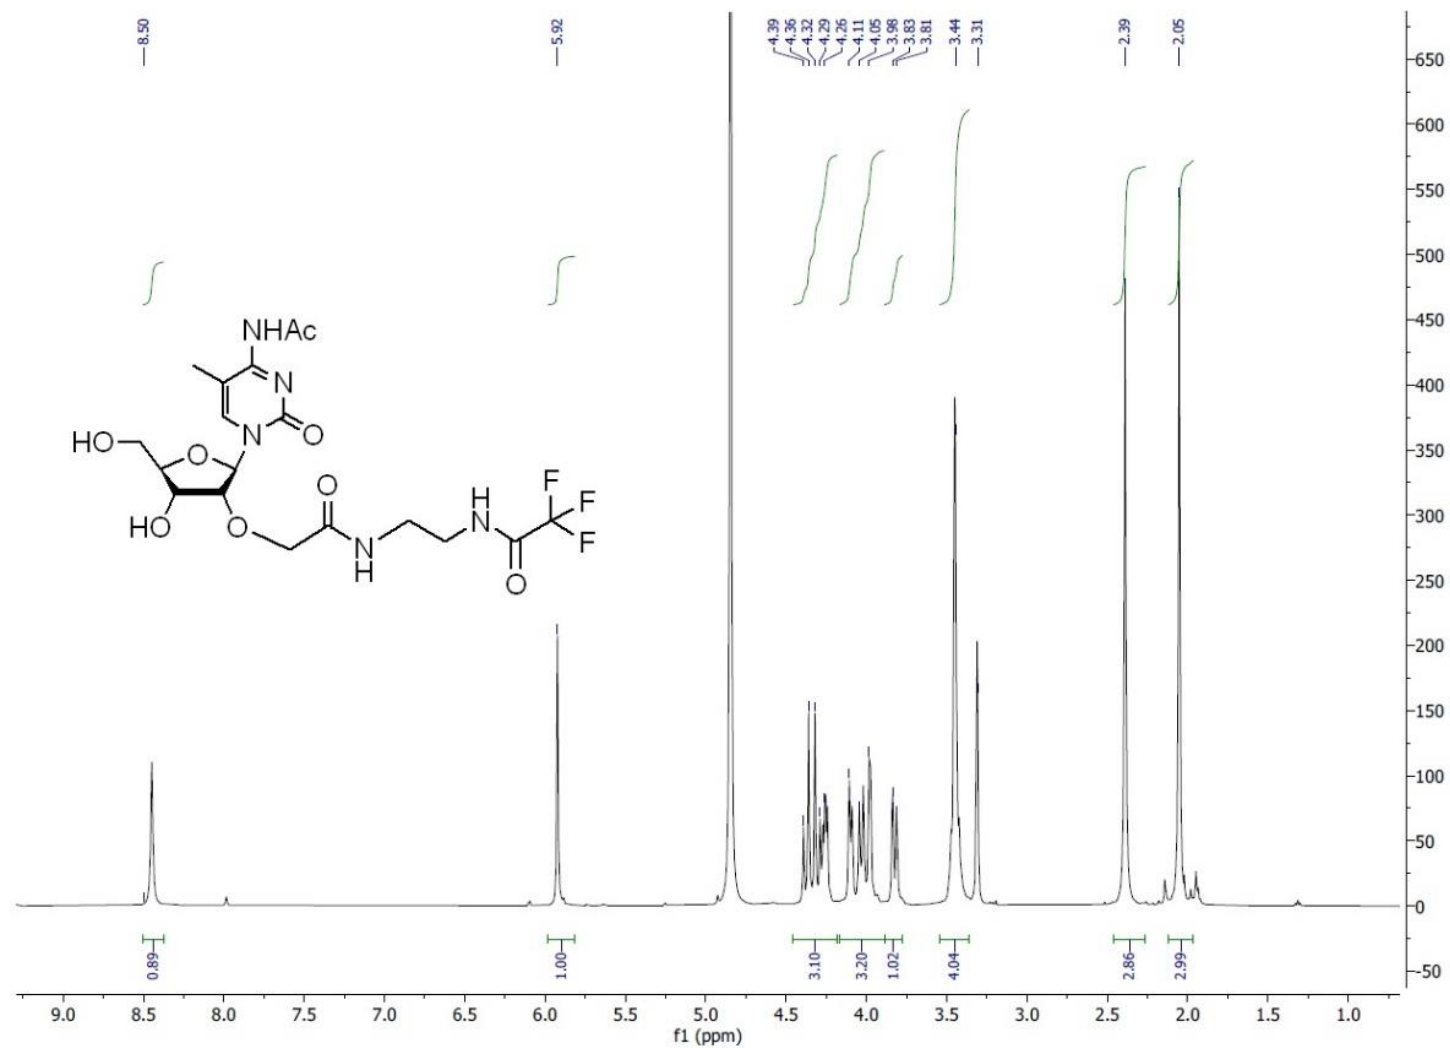

Figure S23.  $^1\text{H}$  NMR spectrum of compound **14** (500 MHz,  $\text{CD}_3\text{OD}$ ).

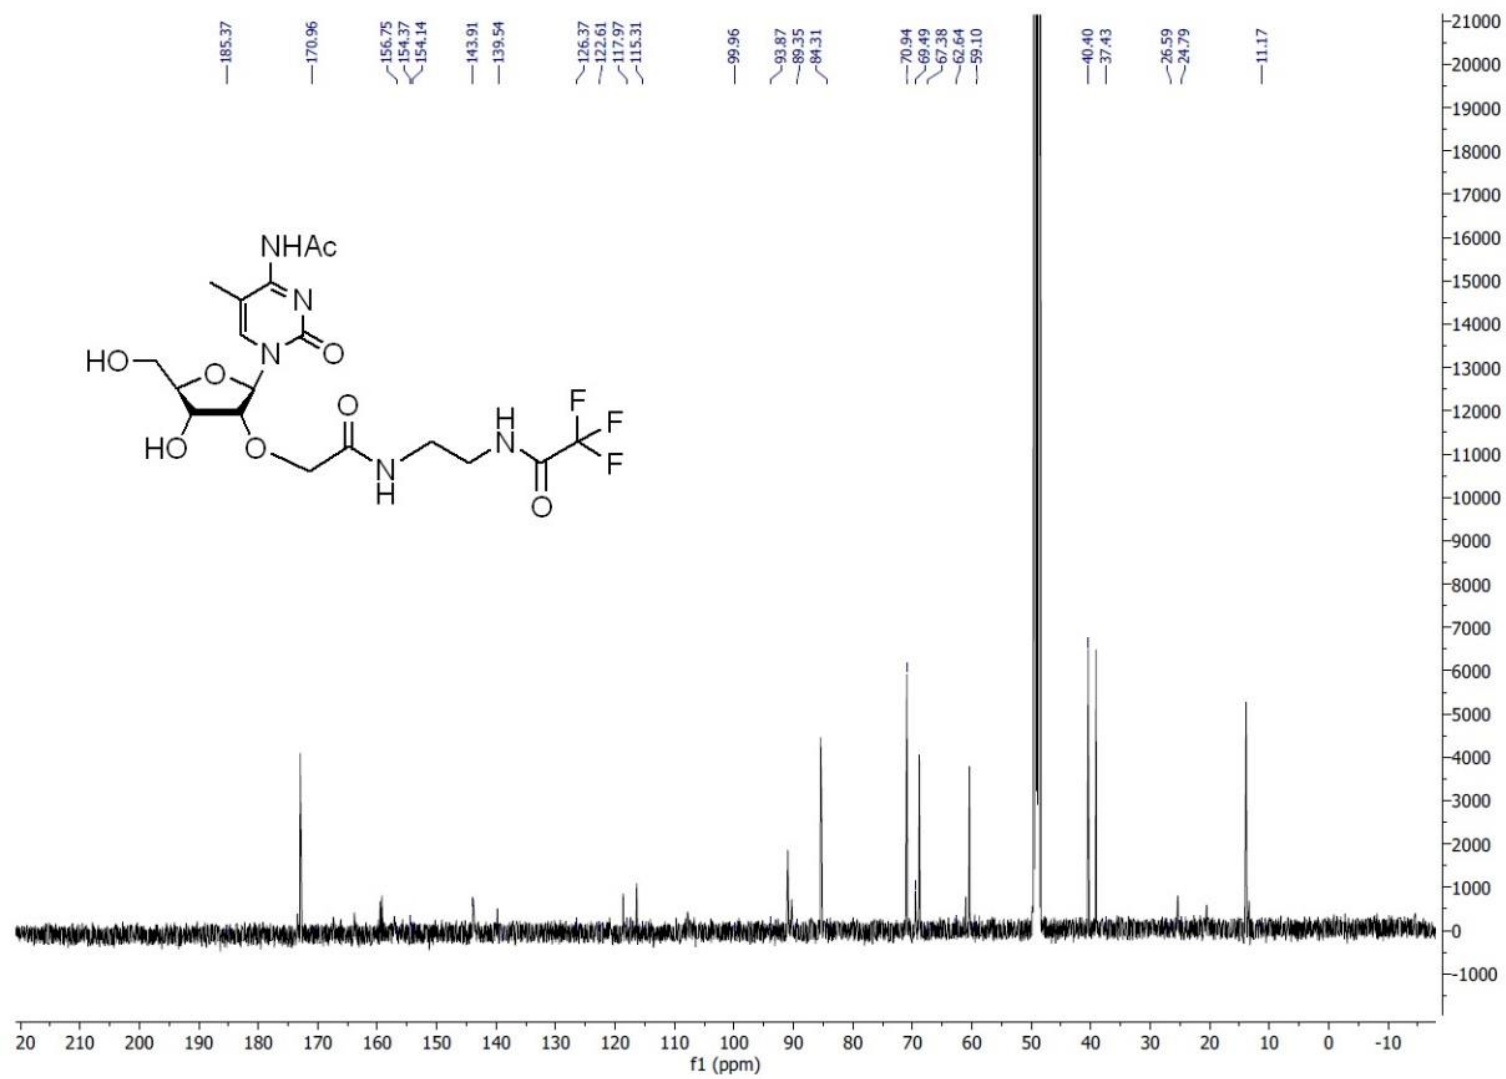

Figure S24.  $^{13}\text{C}$  NMR spectrum of compound **14** (125.76 MHz,  $\text{CD}_3\text{OD}$ ).

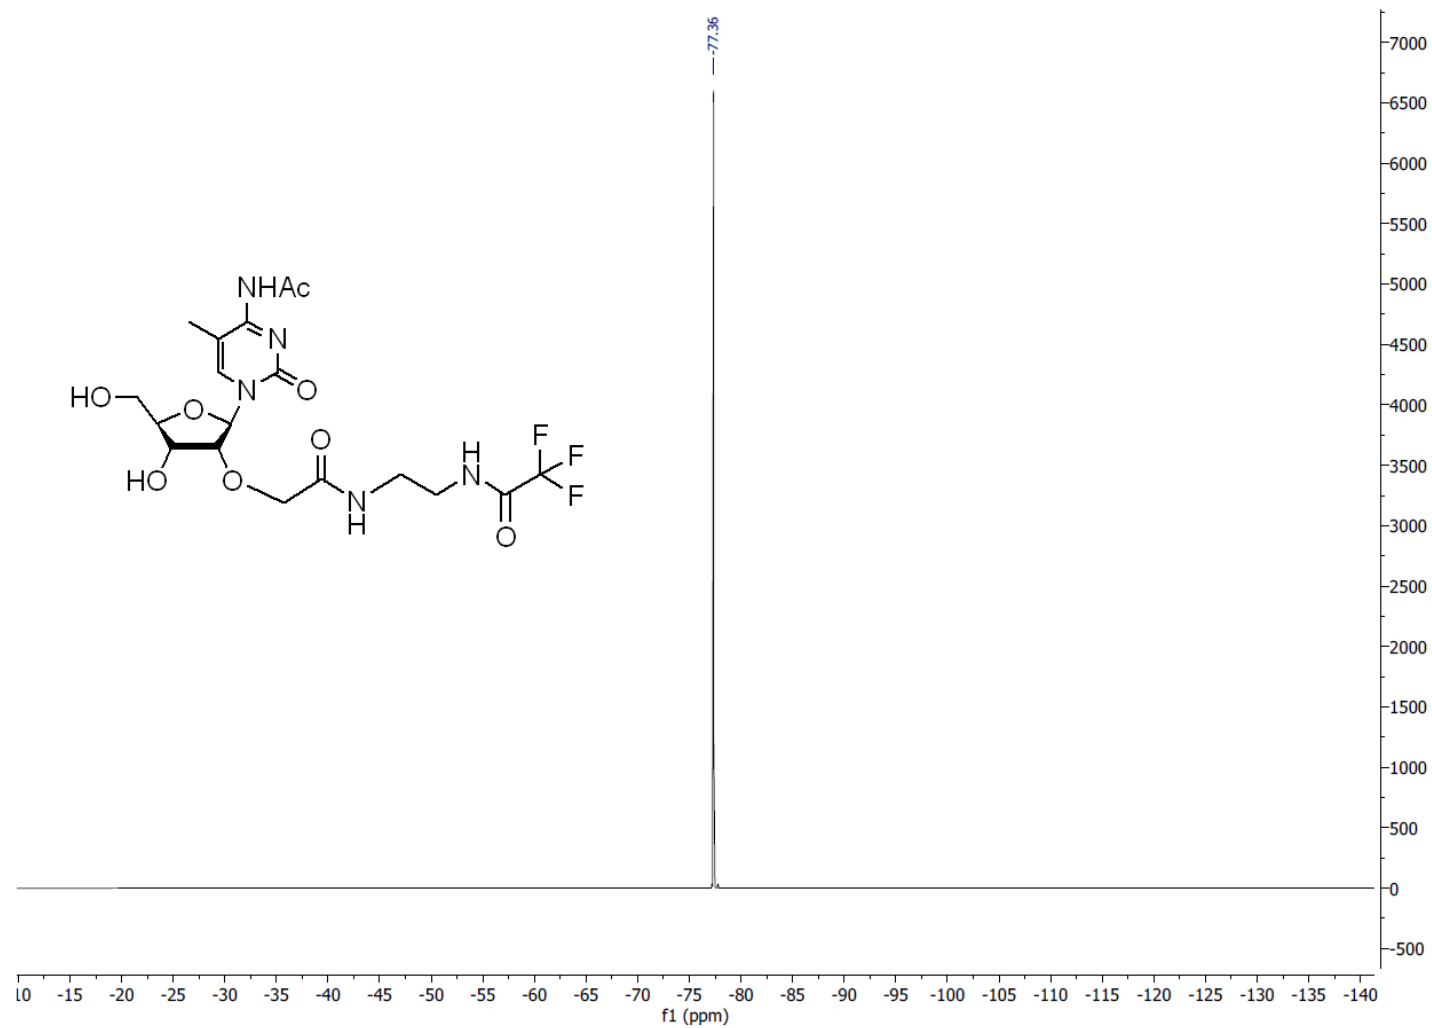

Figure S25.  $^{19}\text{F}$  NMR spectrum of compound **14** (470.56 MHz, CD<sub>3</sub>OD).

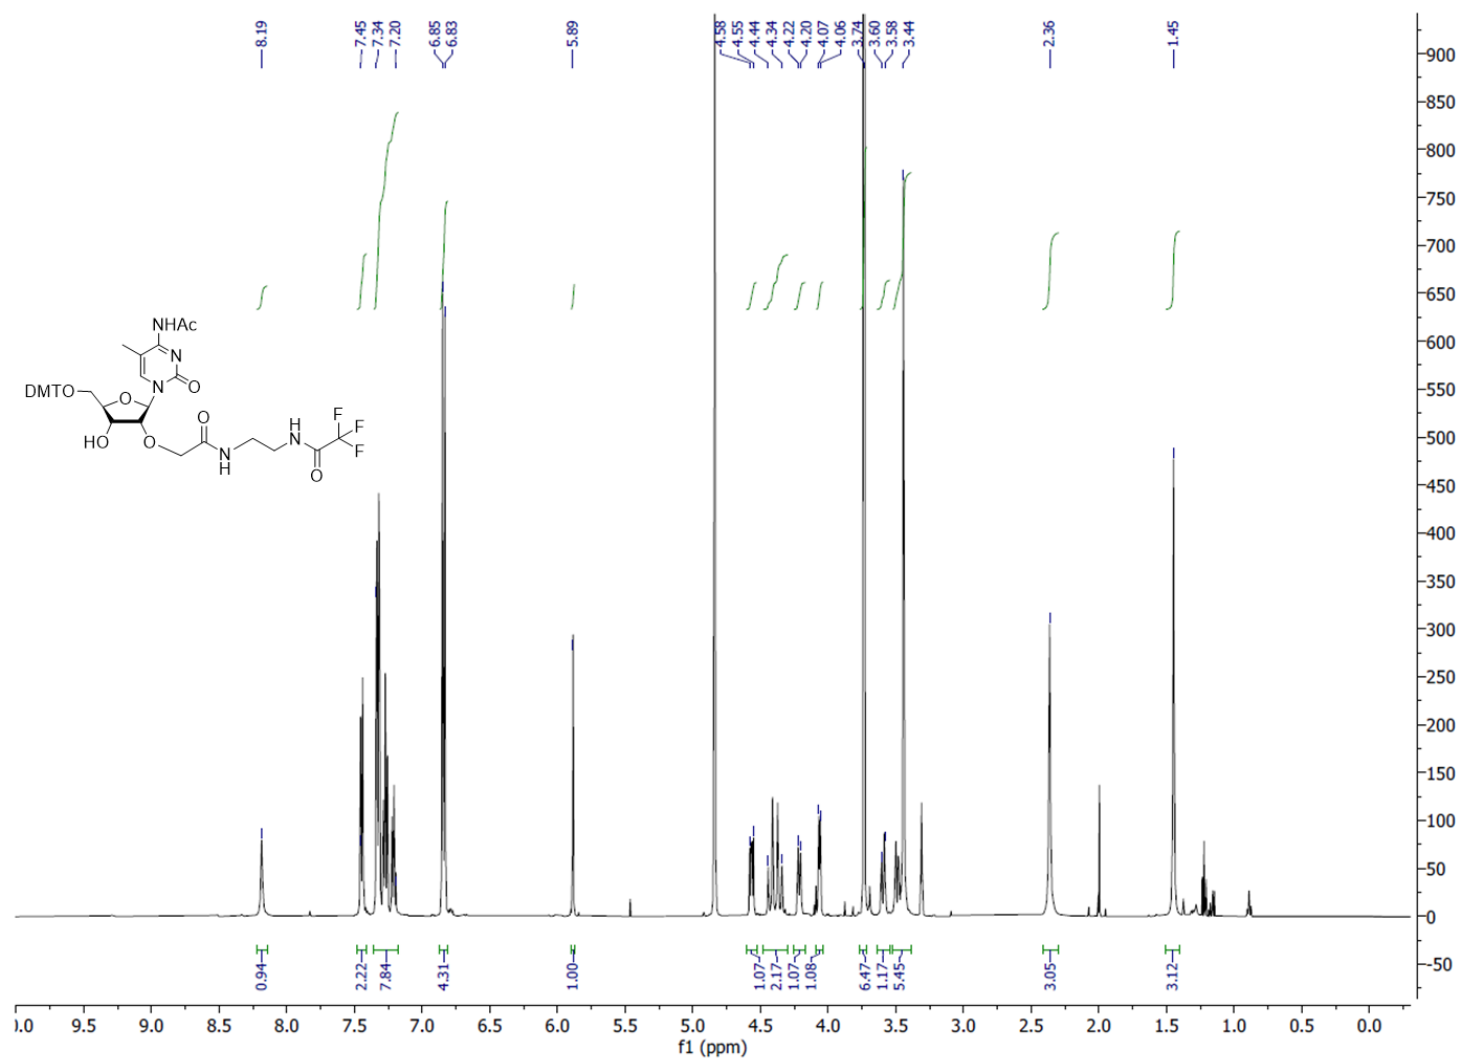

Figure S26.  $^1\text{H}$  NMR spectrum of compound **15** (500 MHz,  $\text{CD}_3\text{OD}$ )

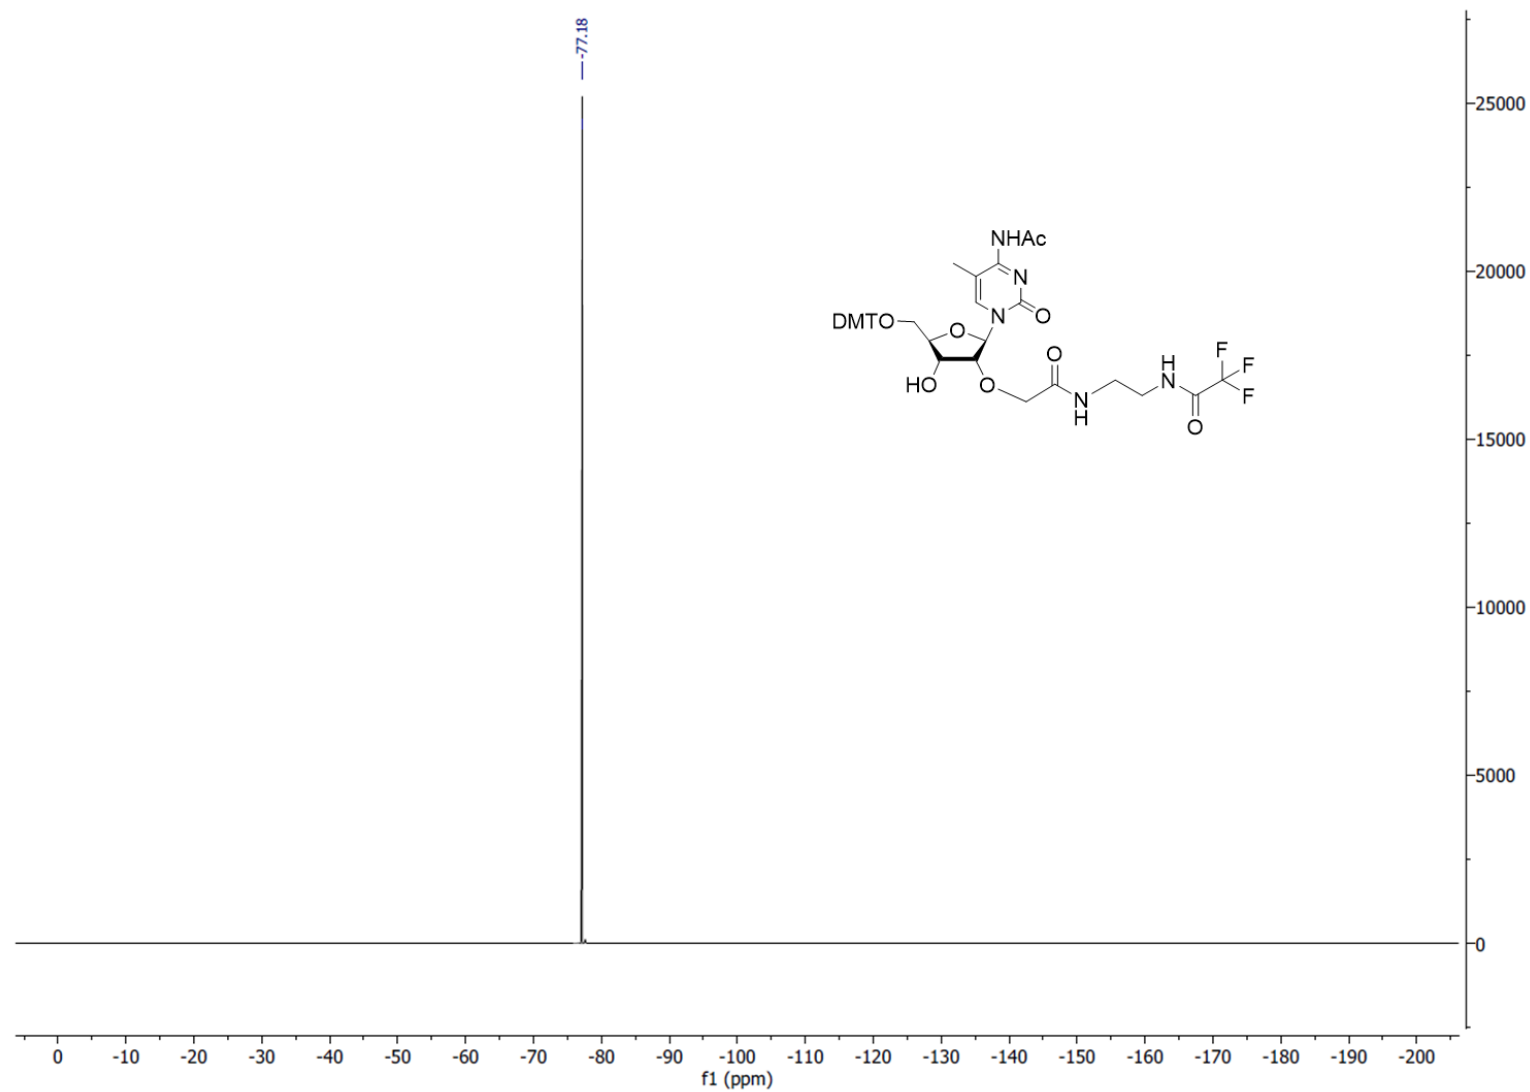

Figure S27.  $^{19}\text{F}$  NMR spectrum of compound **15** (470.56 MHz,  $\text{CD}_3\text{OD}$ ).

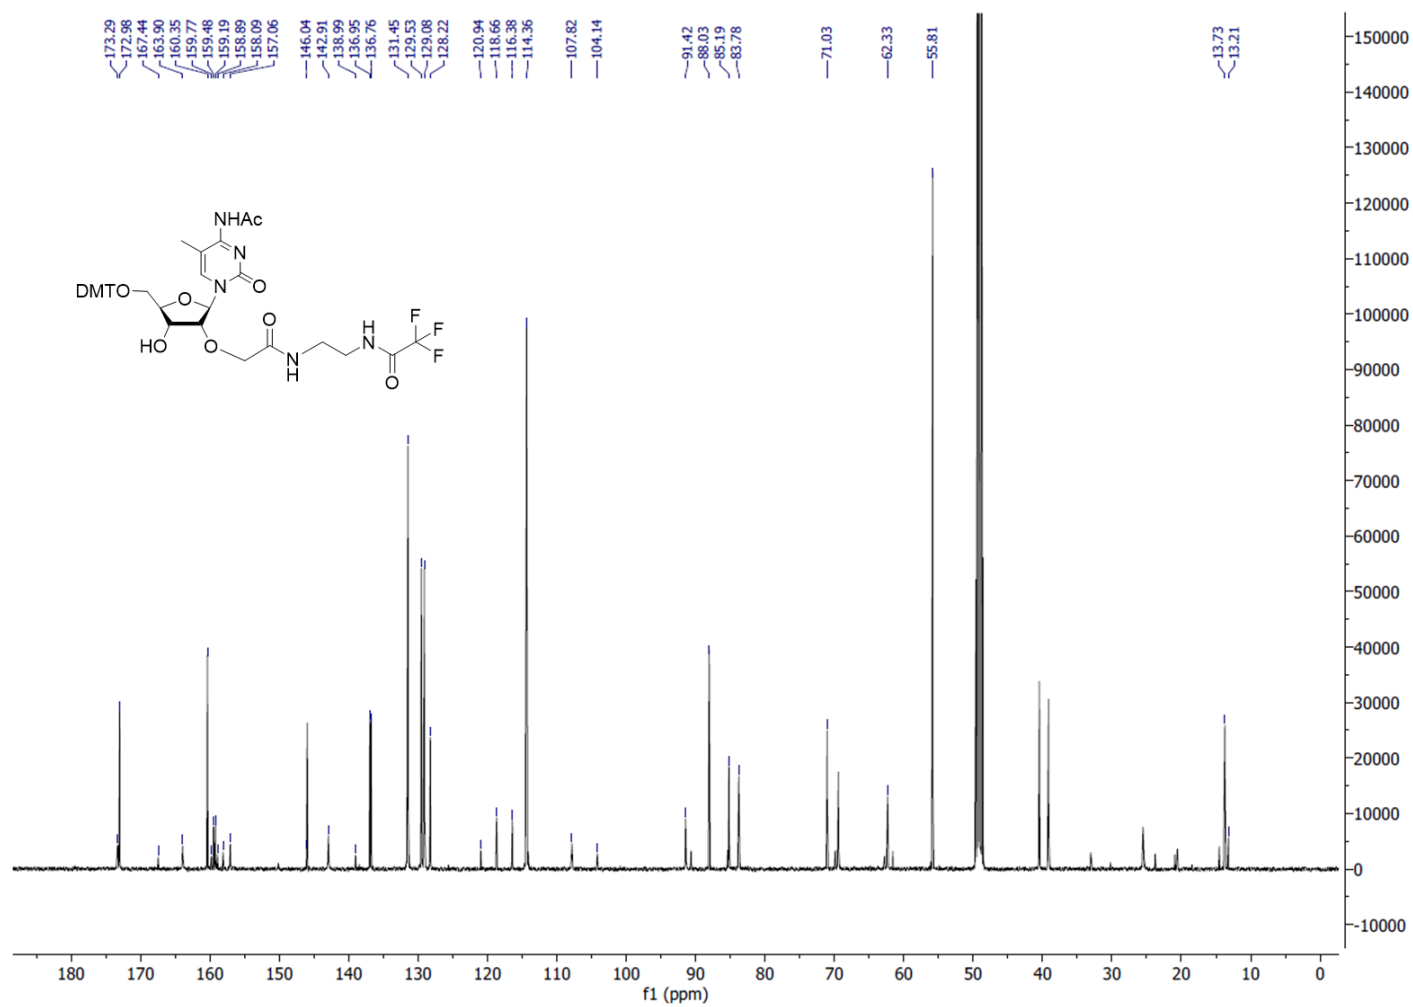

Figure S28. <sup>13</sup>C NMR spectrum of compound **15** (125.76 MHz, CD<sub>3</sub>OD).



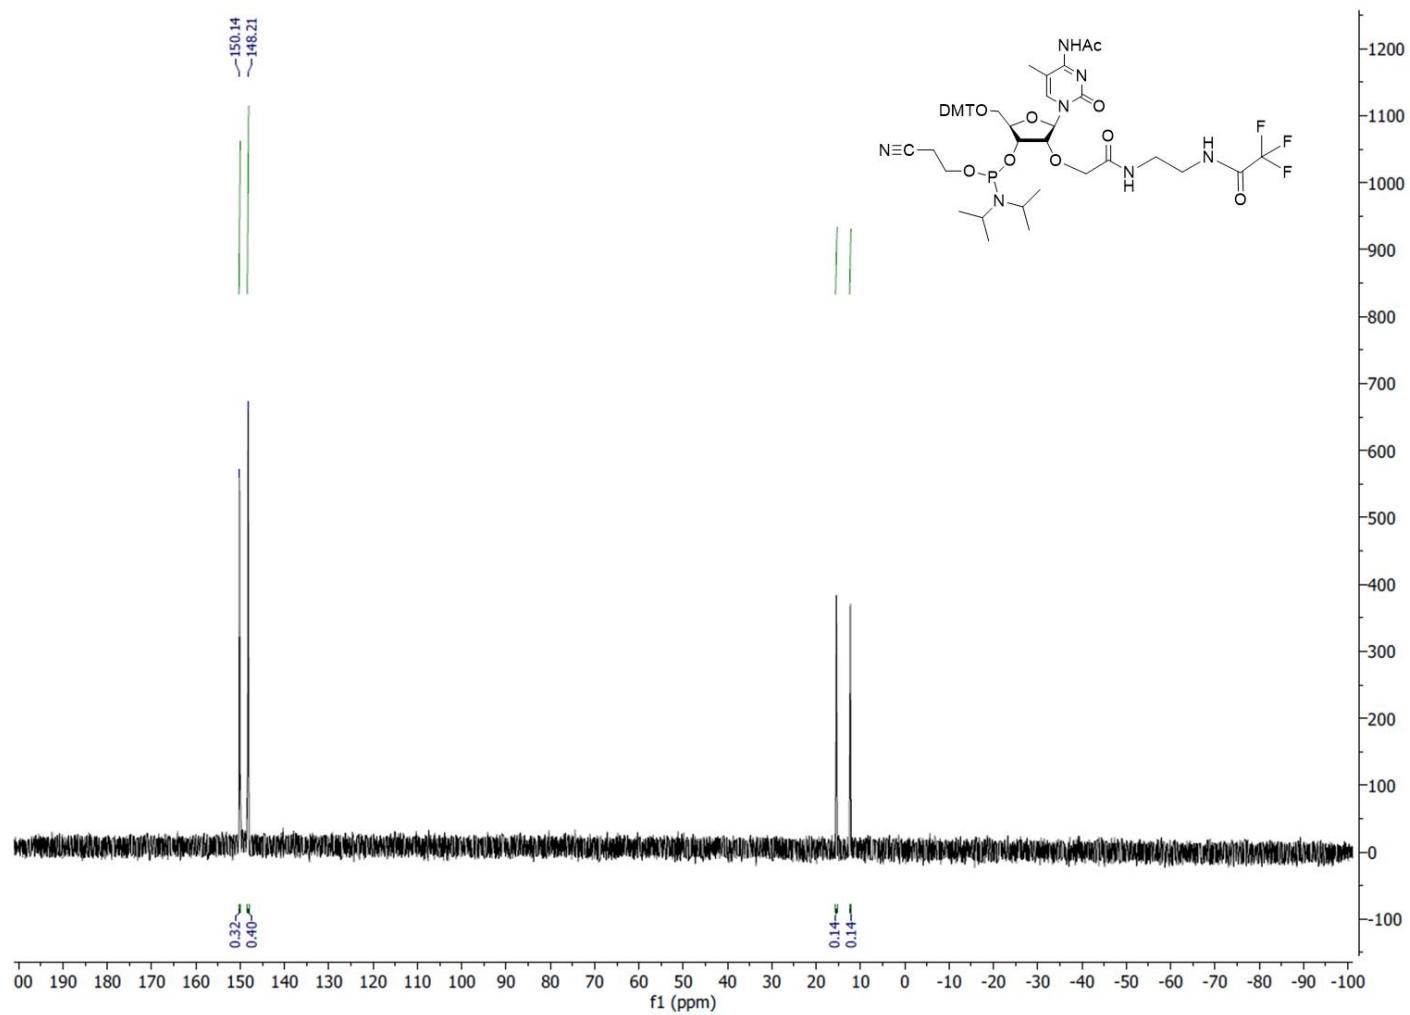

Figure S29.  $^{31}\text{P}$  NMR spectrum of compound **16** (202.47 MHz,  $\text{CD}_3\text{CN}$ ) before reversed phase chromatography.

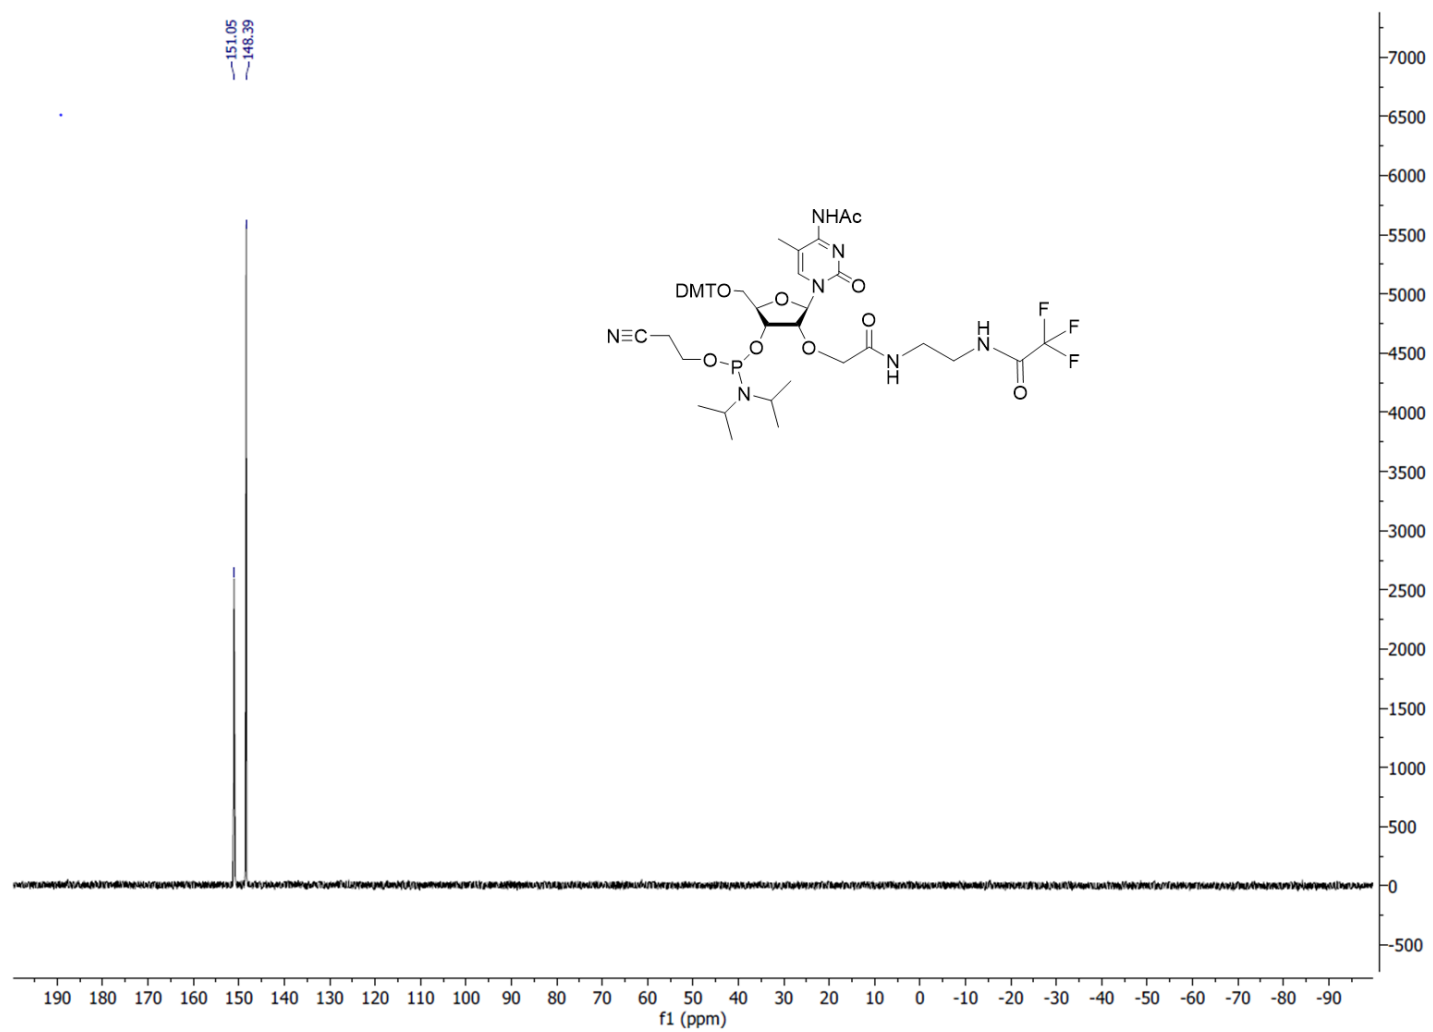

Figure S30.  $^{31}\text{P}$  NMR spectrum of compound **16** (202.47 MHz,  $\text{CD}_3\text{CN}$ ) after reversed phase chromatography.

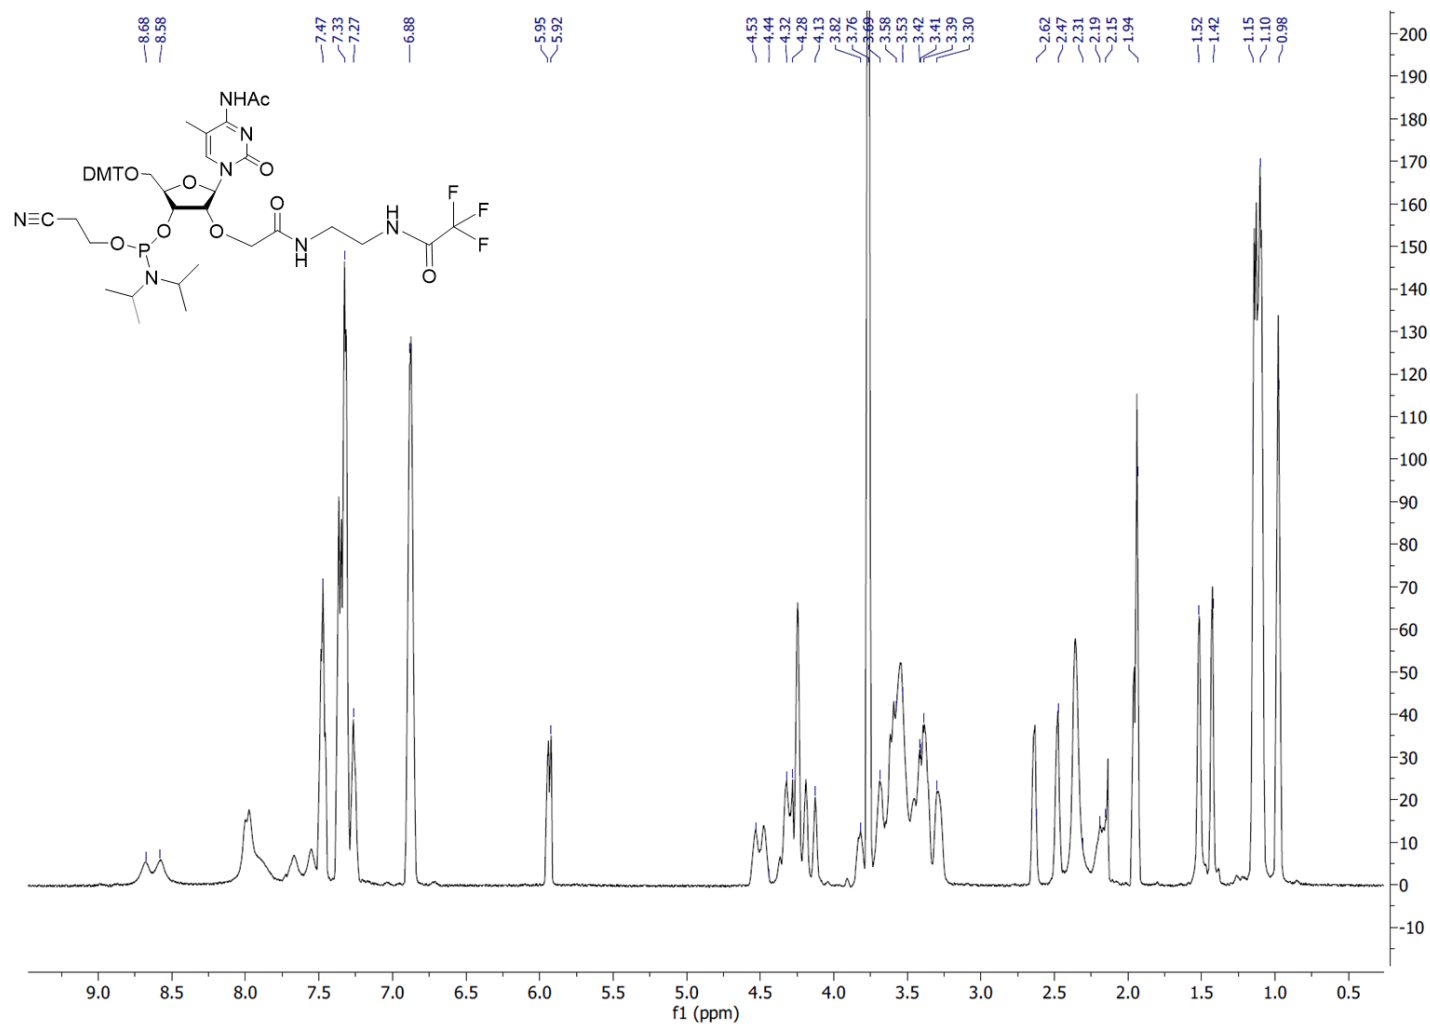

Figure S31. <sup>1</sup>H NMR spectrum of compound 16 (500 MHz, CD<sub>3</sub>CN) after reversed phase chromatography.

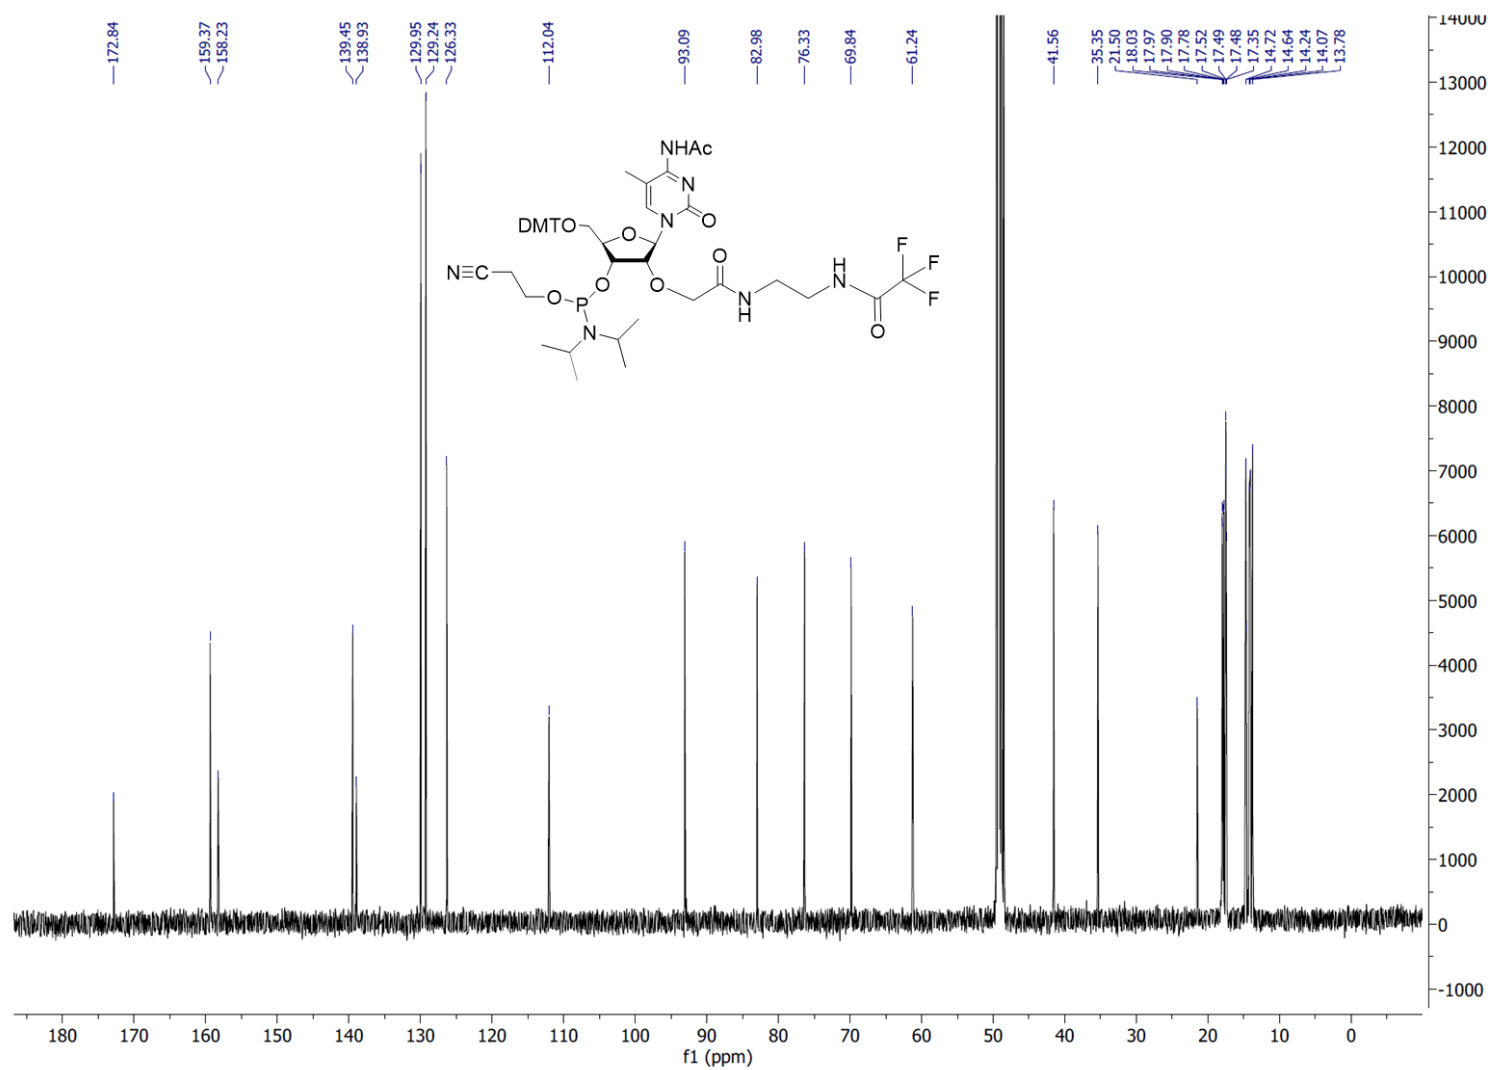

Figure S32. <sup>13</sup>C NMR spectrum of compound 16 (125.76 MHz, CD<sub>3</sub>CN) after reversed phase chromatography.

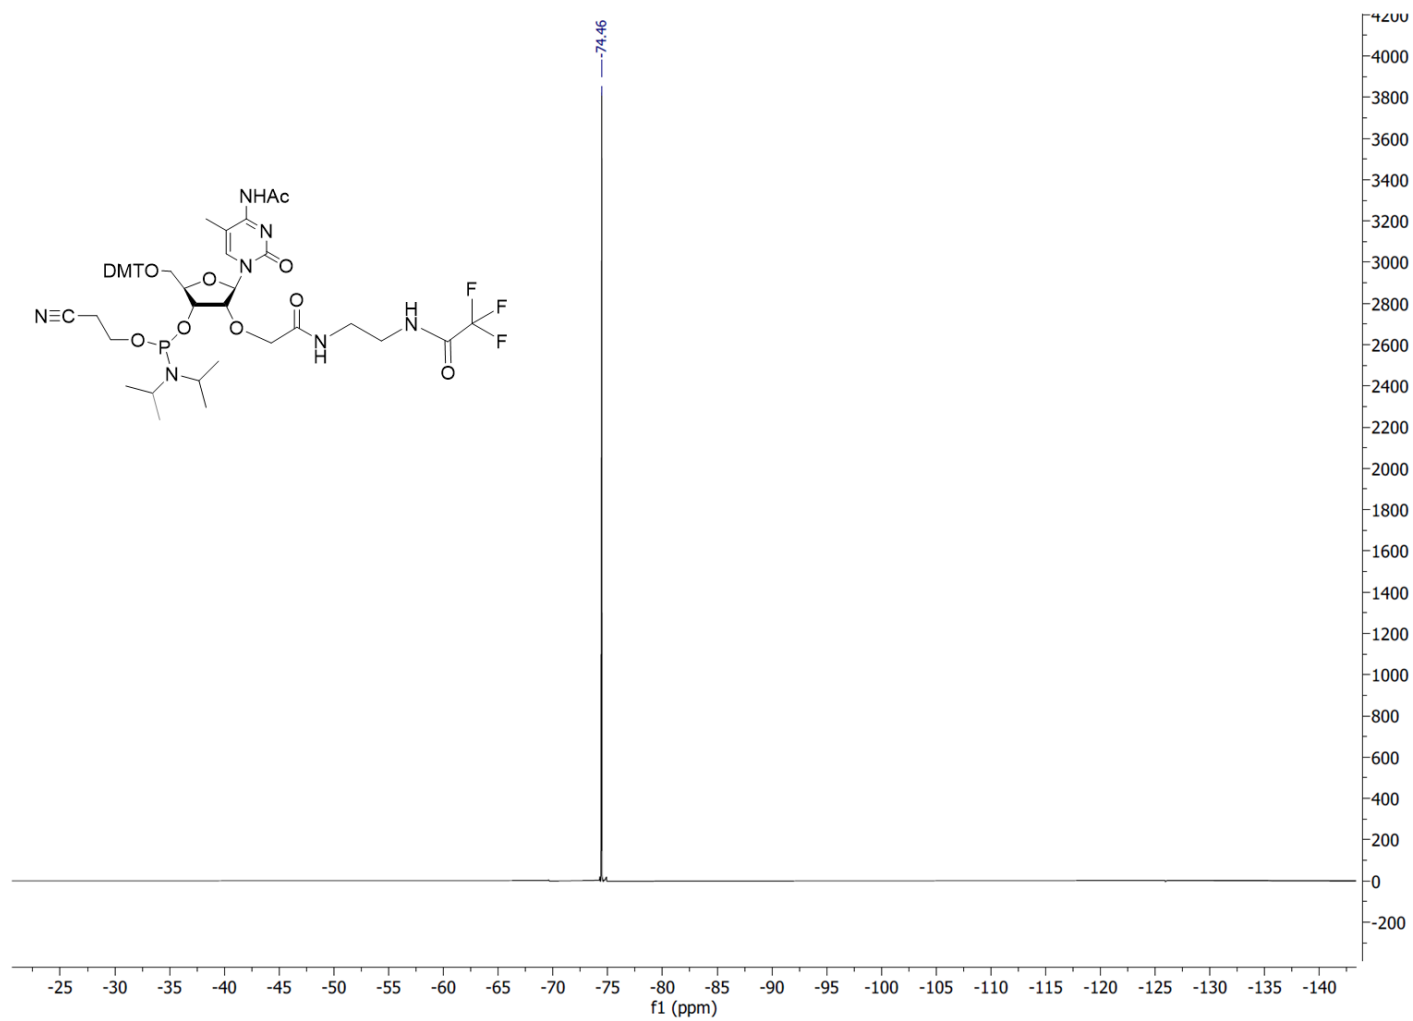

Figure S33.  $^{19}\text{F}$  NMR spectrum of compound **16** (470.56 MHz,  $\text{DMSO}-d_6$ ) after reversed phase chromatography.

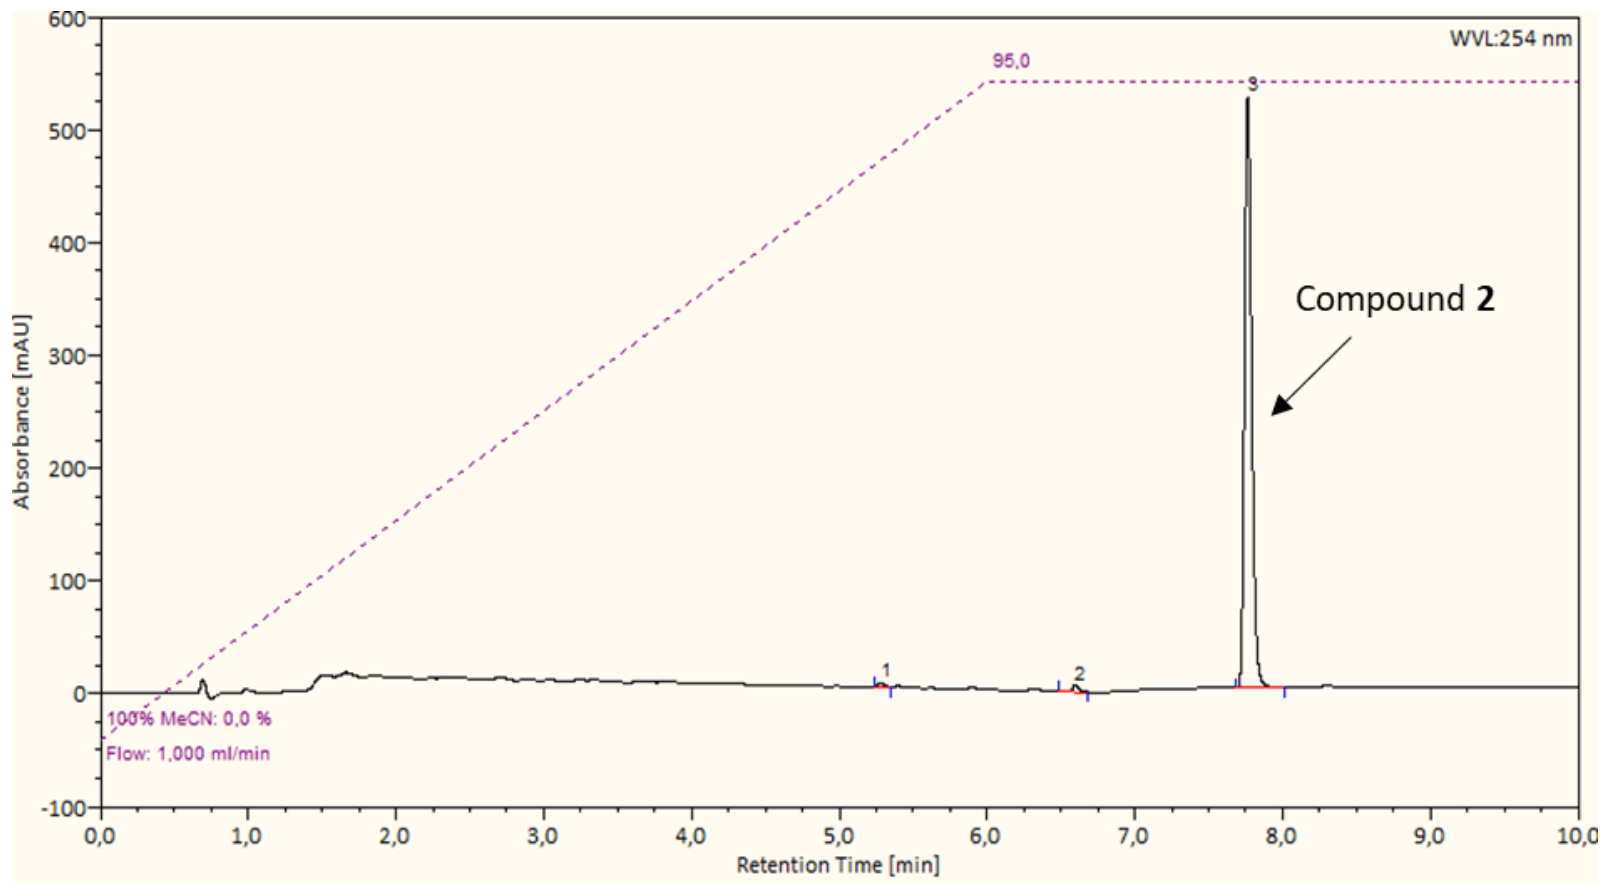

Figure S34 RP-HPLC profile of compound 2 using RP HPLC on C18 column (Waters XBridge® Oligonucleotide BEH C18) with a linear gradient from 0-100% of buffer B in buffer A over 10 min at 40 °C. Buffer A: 5 mM ammonium acetate, buffer B: MeCN.

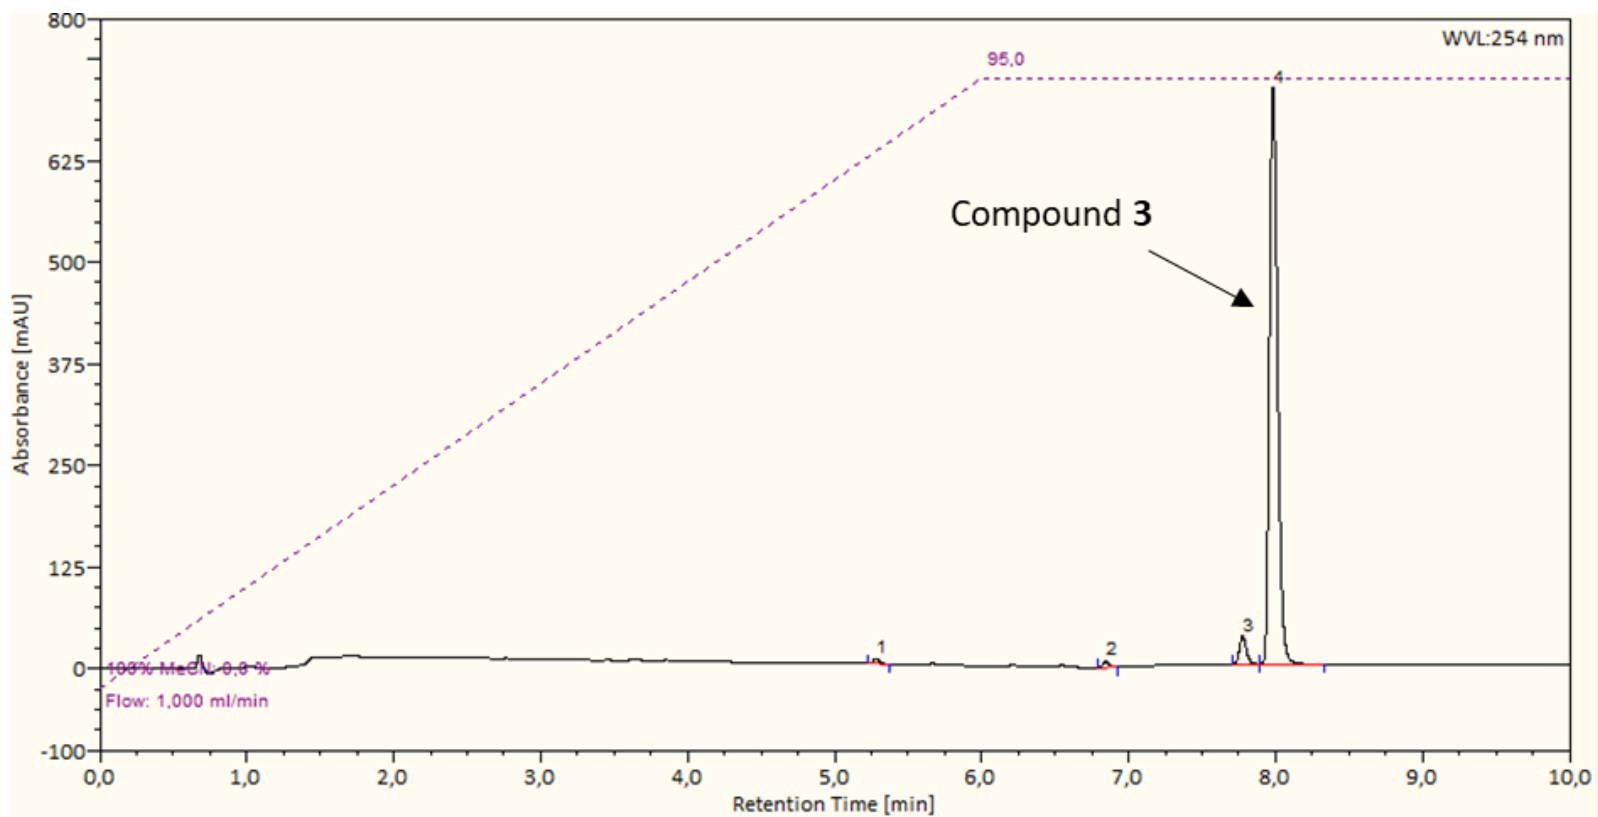

Figure S35. RP-HPLC profile of compound **3** using RP HPLC on C18 column (Waters XBridge® Oligonucleotide BEH C18) with a linear gradient from 0-100% of buffer B in buffer A over 10 min at 40 °C. Buffer A: 5 mM ammonium acetate, buffer B: MeCN.

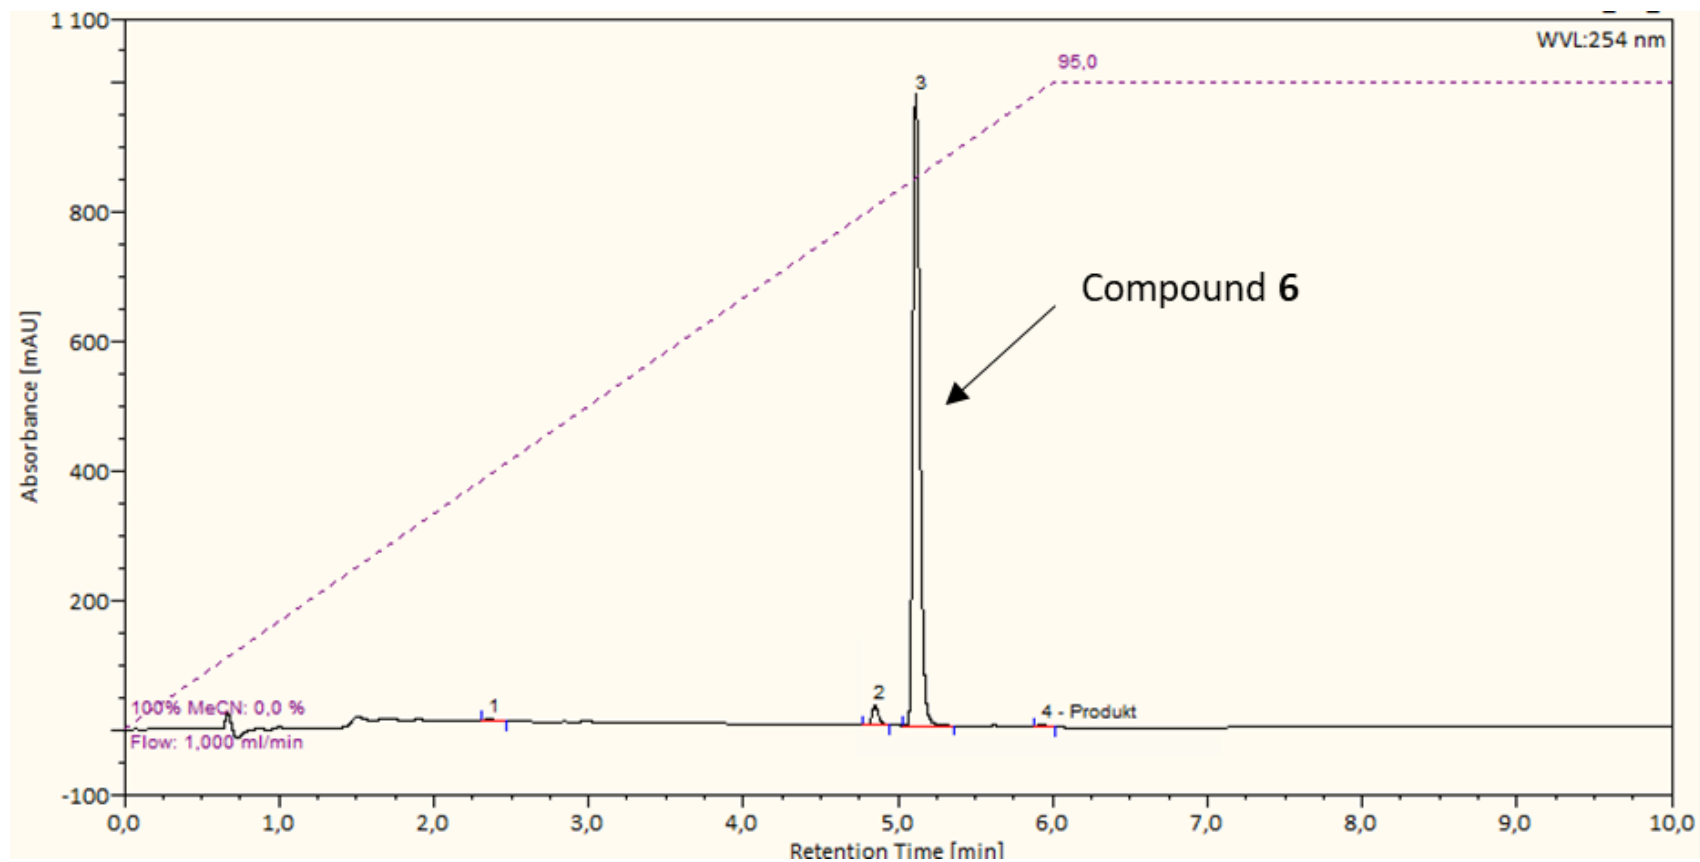

Figure S36. RP-HPLC profile of compound **6** using RP HPLC on C18 column (Waters XBridge® Oligonucleotide BEH C18) with a linear gradient from 0-100% of buffer B in buffer A over 10 min at 40 °C. Buffer A: 5 mM ammonium acetate, buffer B: MeCN.



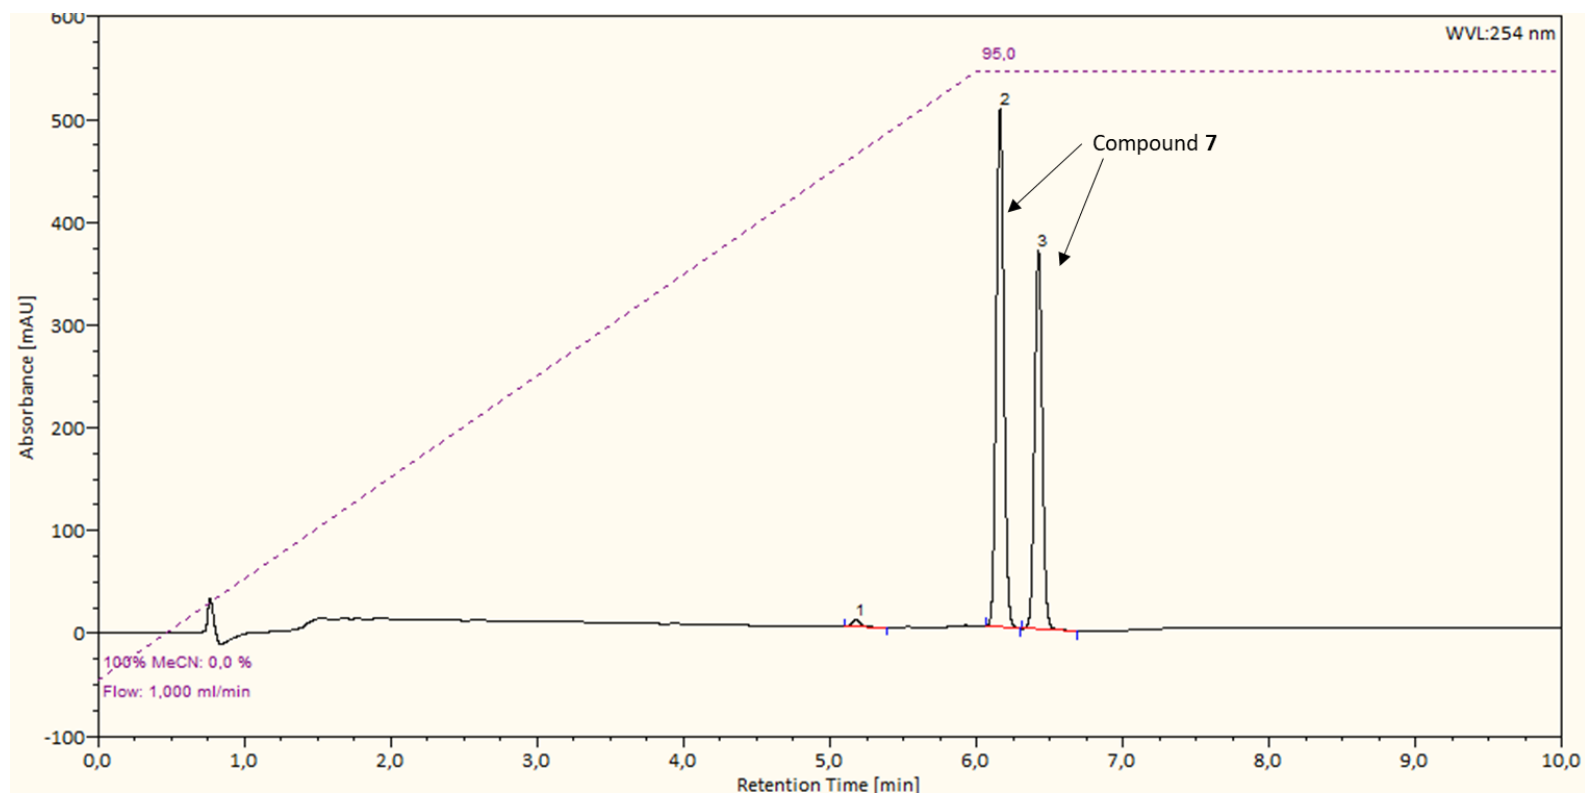

Figure S37. RP-HPLC profile of compound 7 using RP HPLC on C18 column (Waters XBridge® Oligonucleotide BEH C18) with a linear gradient from 0-100% of buffer B in buffer A over 10 min at 40 °C. Buffer A: 5 mM ammonium acetate, buffer B: MeCN.

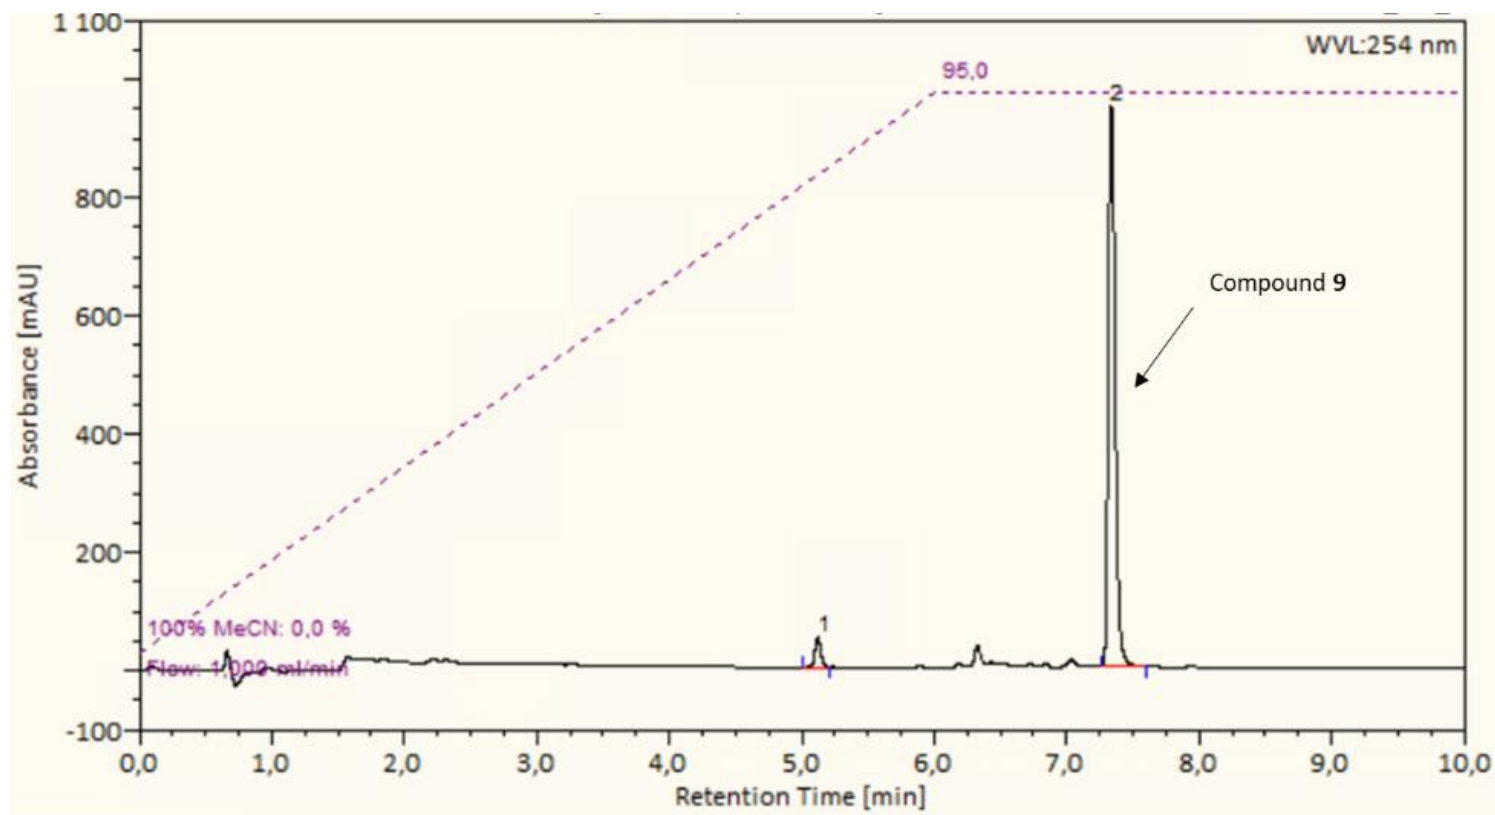

Figure S38. RP-HPLC profile of compound **9** using RP HPLC on C18 column (Waters XBridge® Oligonucleotide BEH C18) with a linear gradient from 0-100% of buffer B in buffer A over 10 min at 40 °C. Buffer A: 5 mM ammonium acetate, buffer B: MeCN.

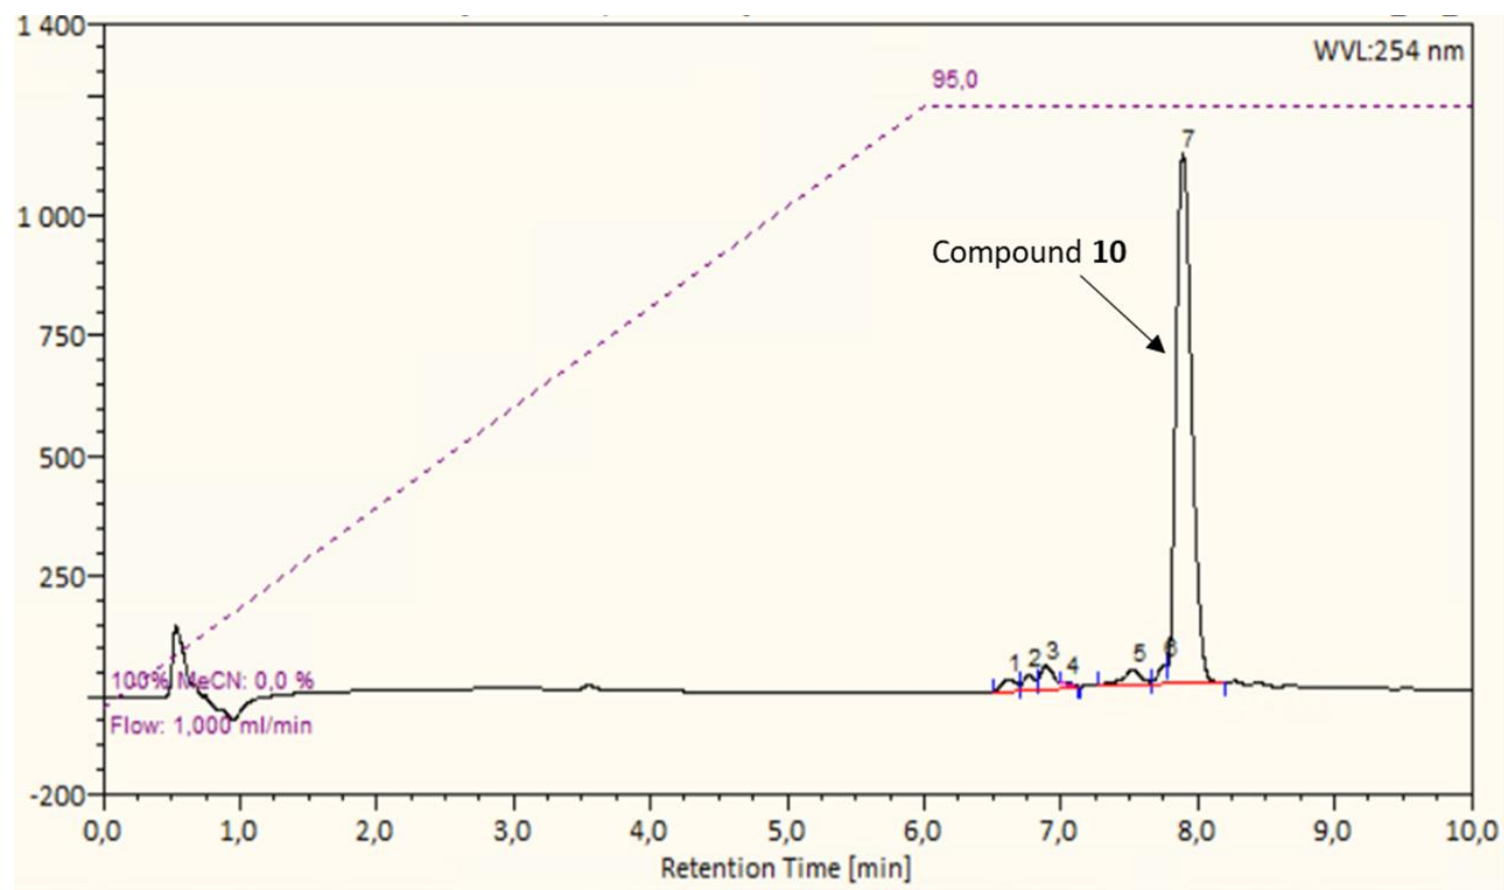

Figure S39. RP-HPLC profile of compound **10** using RP HPLC on C18 column (Waters XBridge® Oligonucleotide BEH C18) with a linear gradient from 0-100% of buffer B in buffer A over 10 min at 40 °C. Buffer A: 5 mM ammonium acetate, buffer B: MeCN.

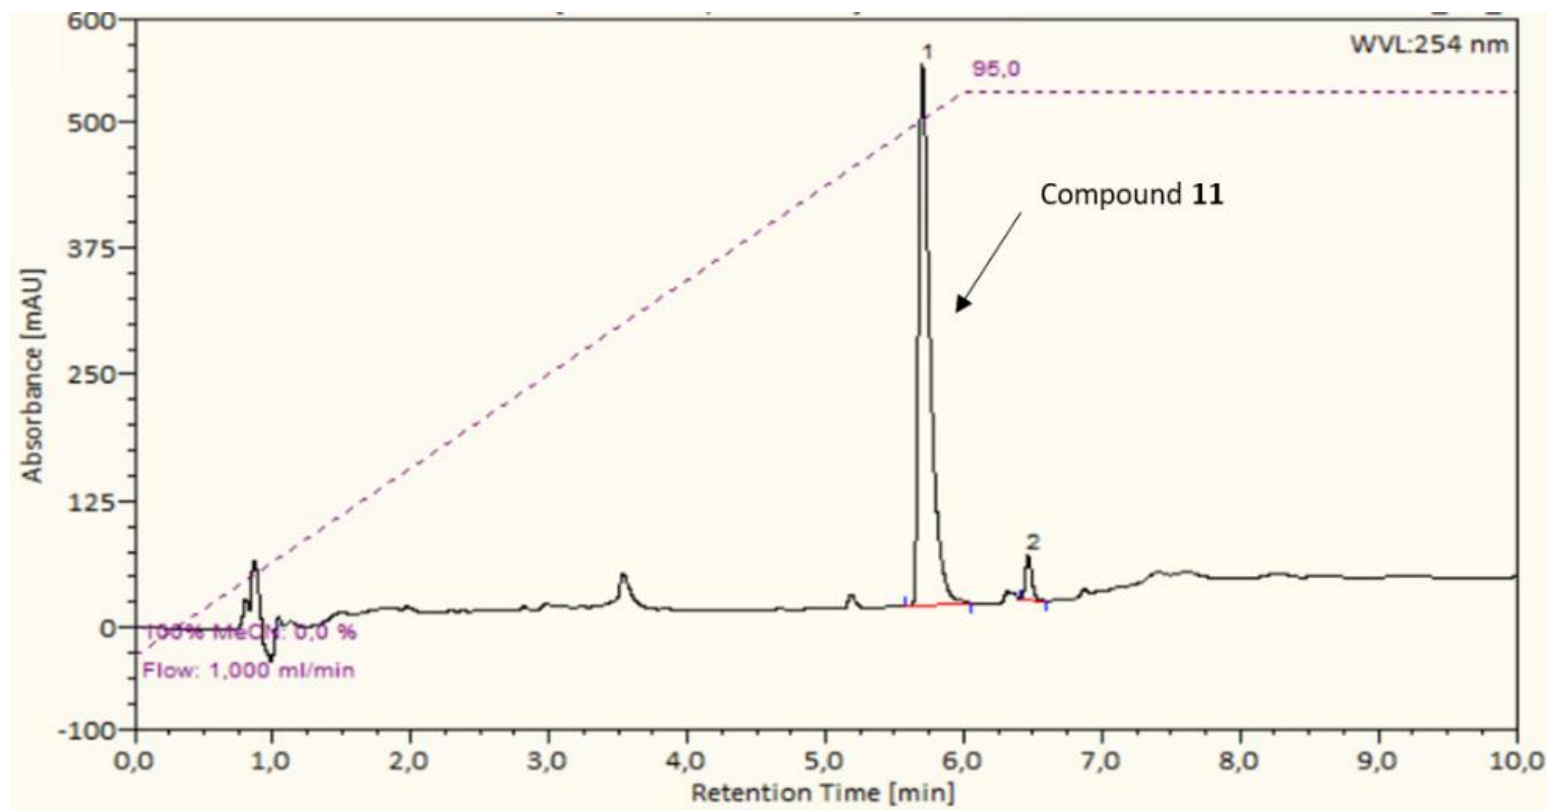

Figure S40. RP-HPLC profile of compound **11** using RP HPLC on C18 column (Waters XBridge® Oligonucleotide BEH C18) with a linear gradient from 0-100% of buffer B in buffer A over 10 min at 40 °C. Buffer A: 5 mM ammonium acetate, buffer B: MeCN.

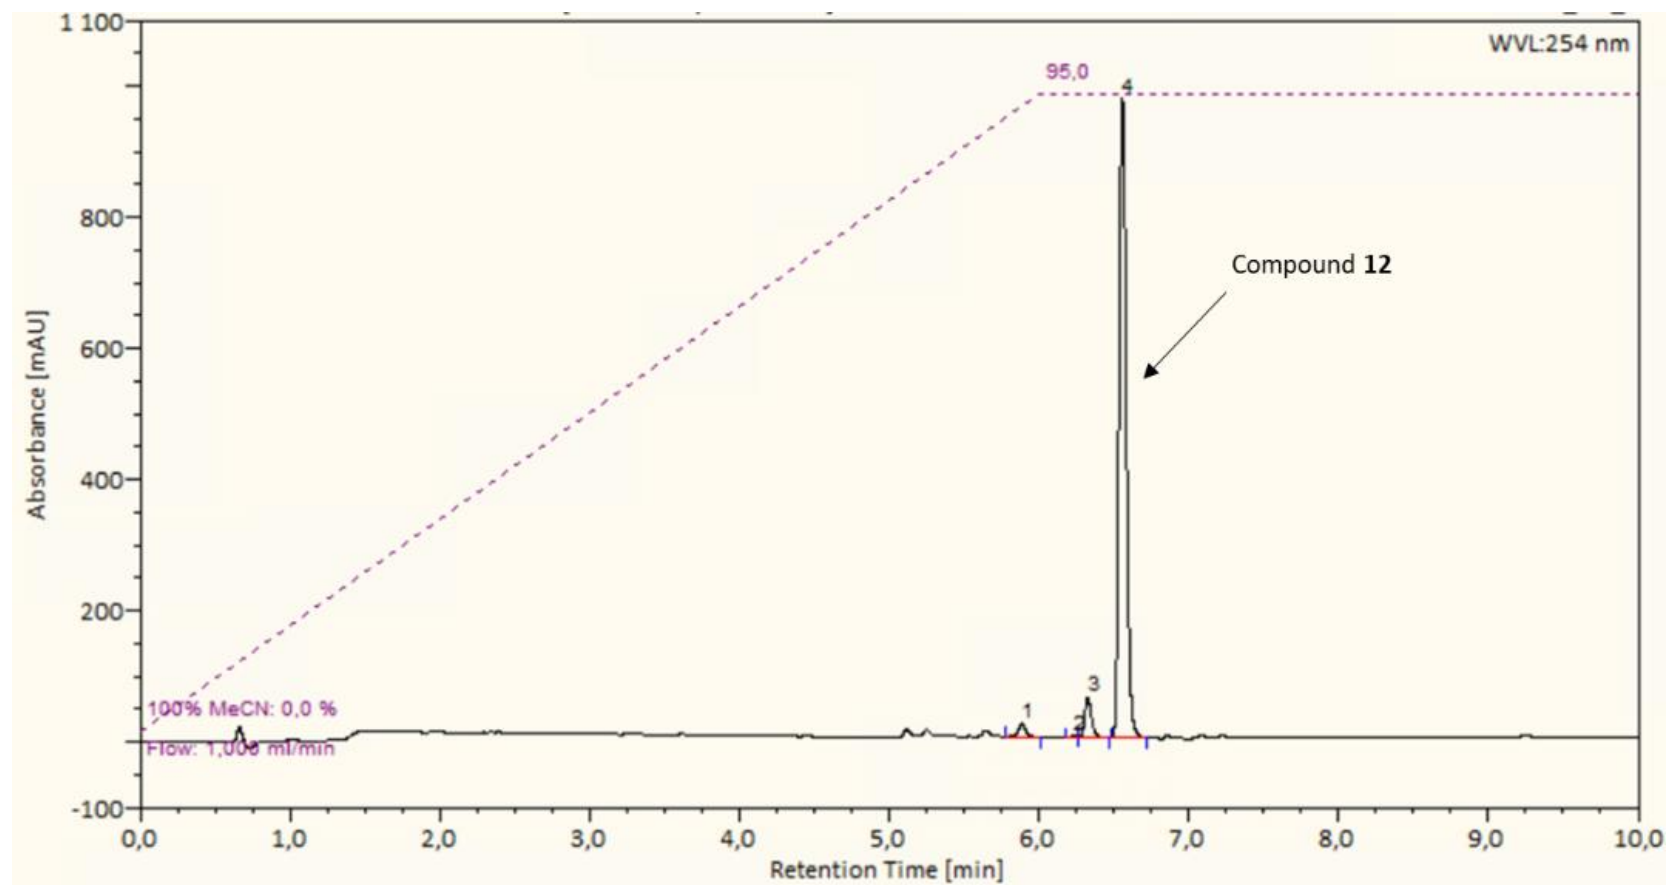

Figure S41. RP-HPLC profile of compound **12** using RP HPLC on C18 column (Waters XBridge® Oligonucleotide BEH C18) with a linear gradient from 0-100% of buffer B in buffer A over 10 min at 40 °C. Buffer A: 5 mM ammonium acetate, buffer B: MeCN.

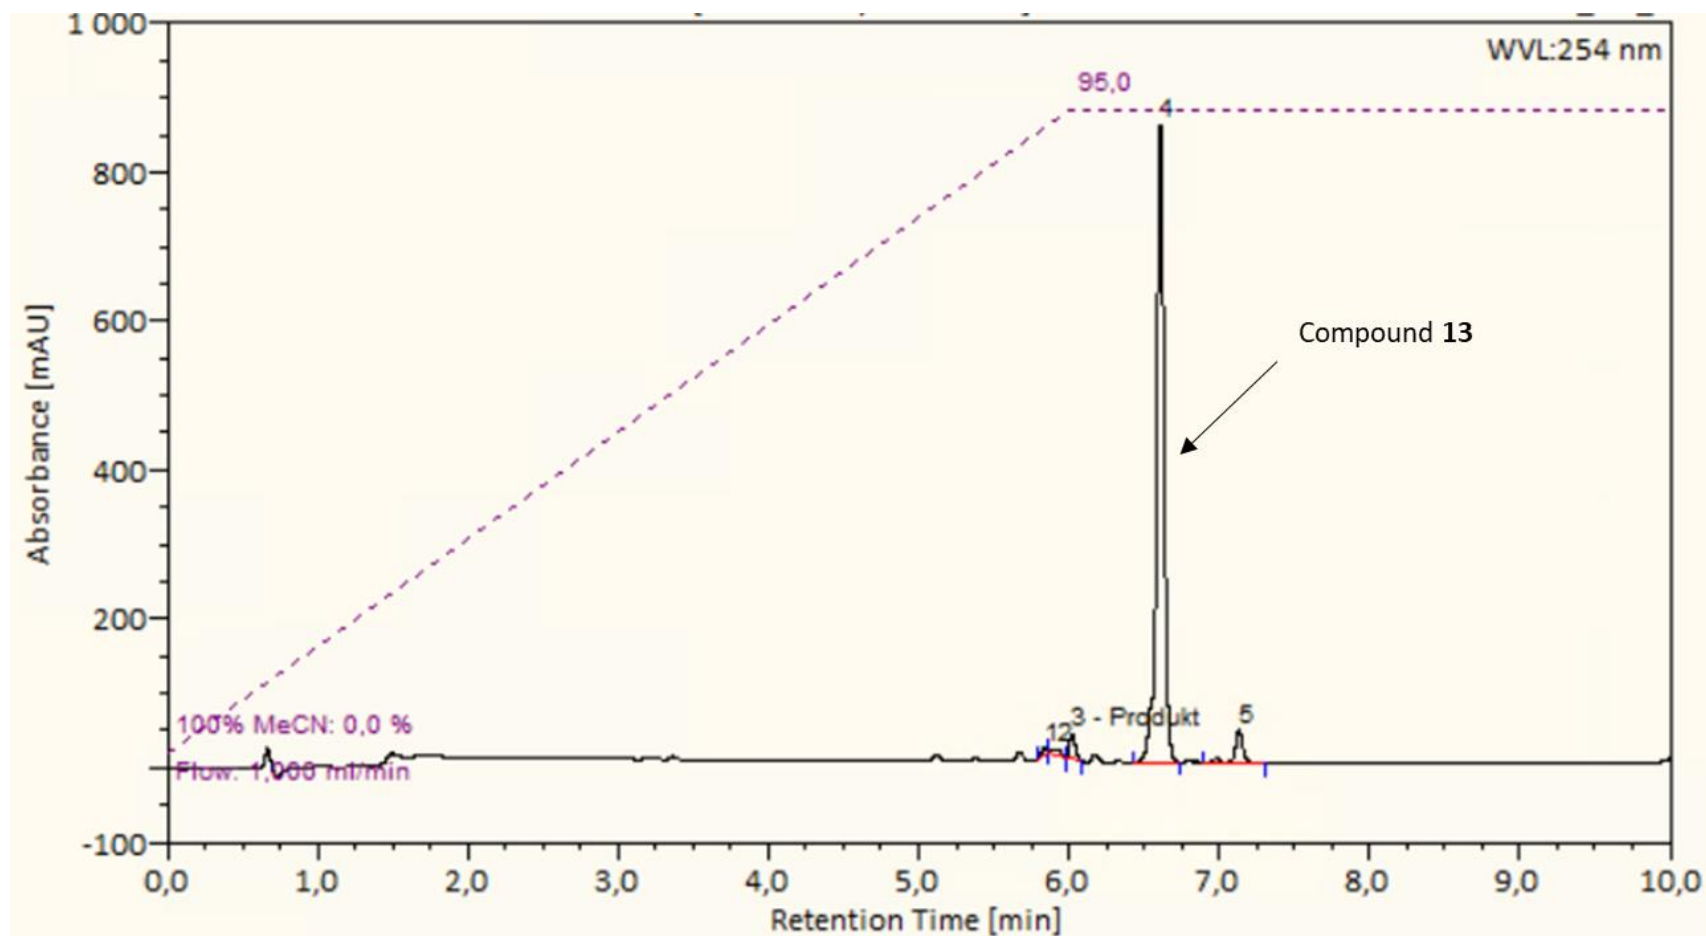

Figure S42. RP-HPLC profile of compound **13** using RP HPLC on C18 column (Waters XBridge® Oligonucleotide BEH C18) with a linear gradient from 0-100% of buffer B in buffer A over 10 min at 40 °C. Buffer A: 5 mM ammonium acetate, buffer B: MeCN.

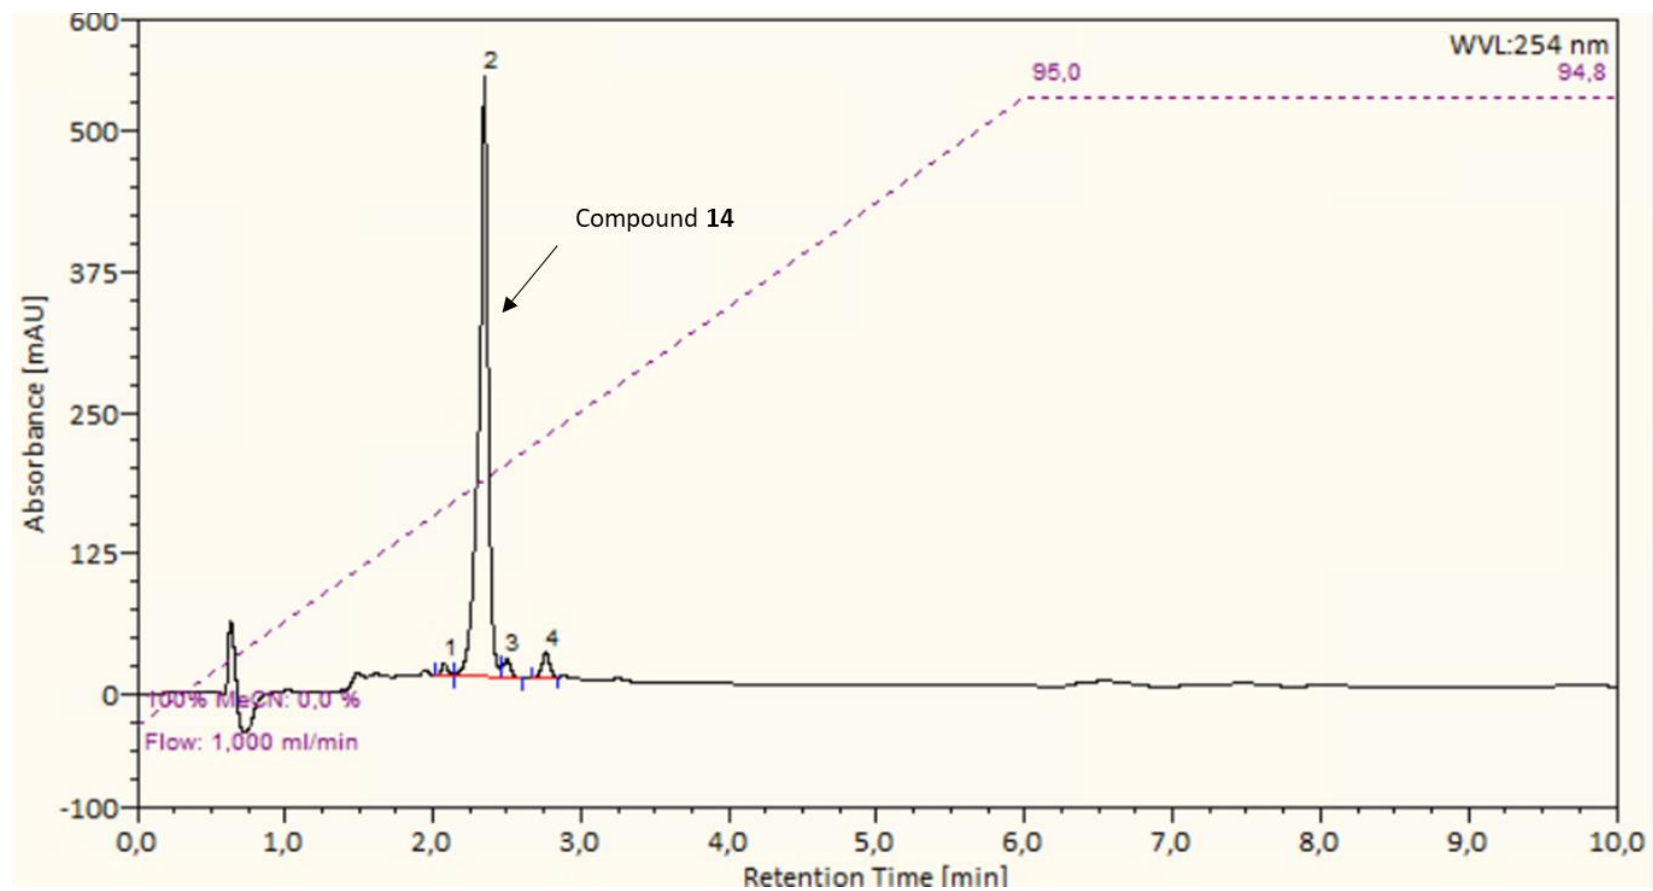

Figure S43. RP-HPLC profile of compound **14** using RP HPLC on C18 column (Waters XBridge® Oligonucleotide BEH C18) with a linear gradient from 0-100% of buffer B in buffer A over 10 min at 40 °C. Buffer A: 5 mM ammonium acetate, buffer B: MeCN.

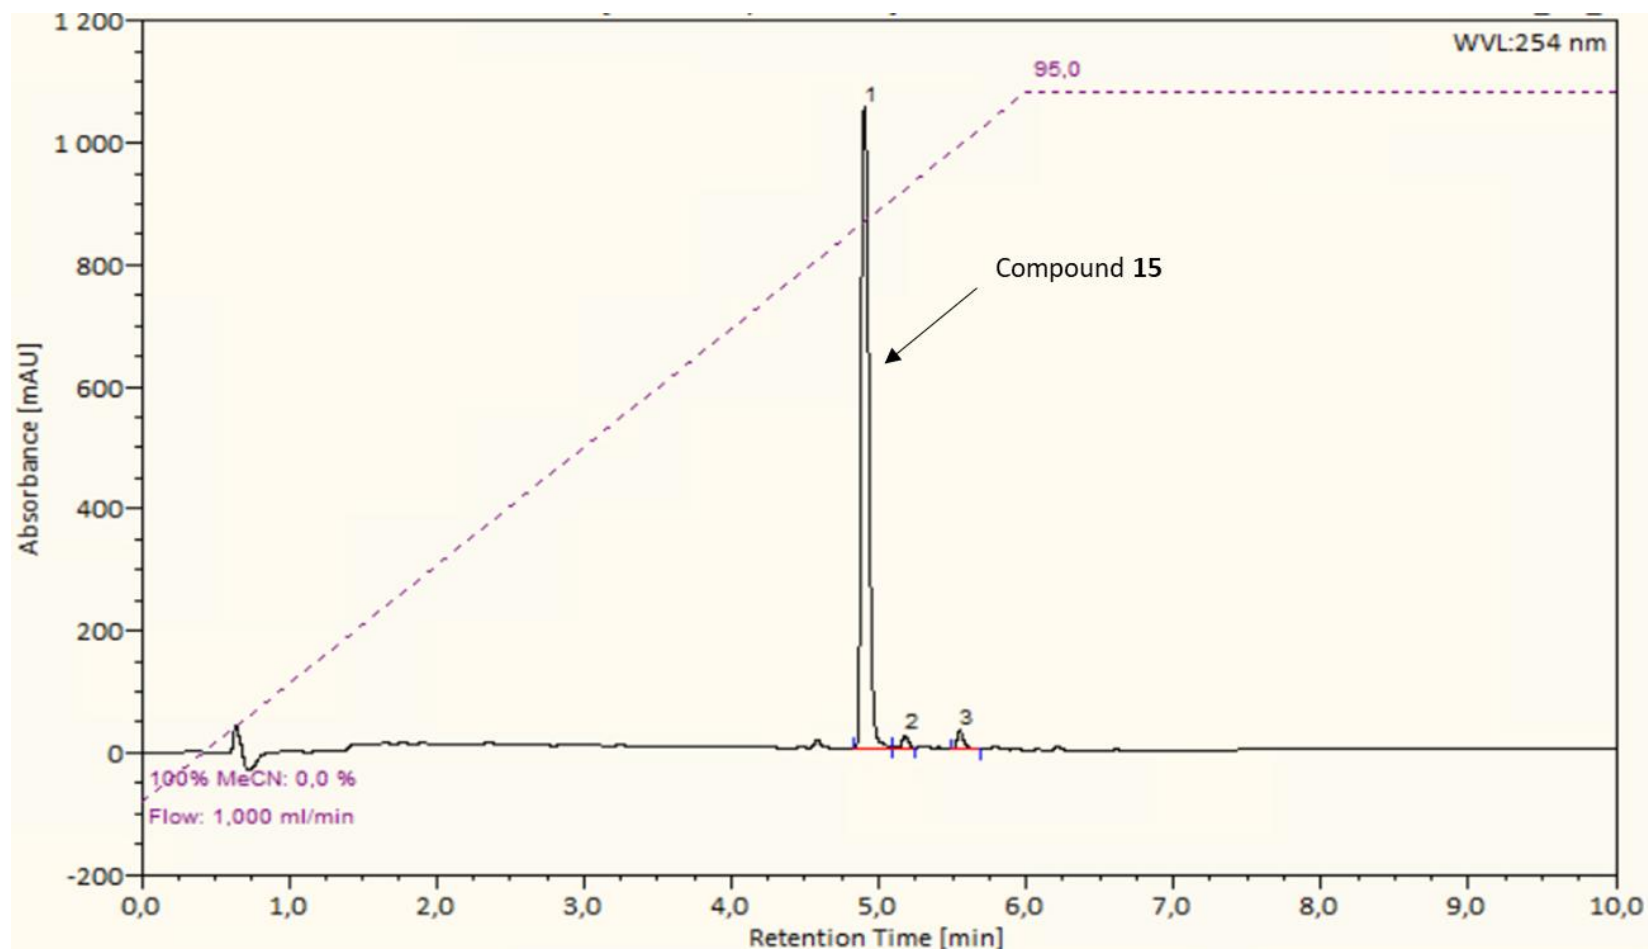

Figure S44. RP-HPLC profile of compound **15** using RP HPLC on C18 column (Waters XBridge® Oligonucleotide BEH C18) with a linear gradient from 0-100% of buffer B in buffer A over 10 min at 40 °C. Buffer A: 5 mM ammonium acetate, buffer B: MeCN.



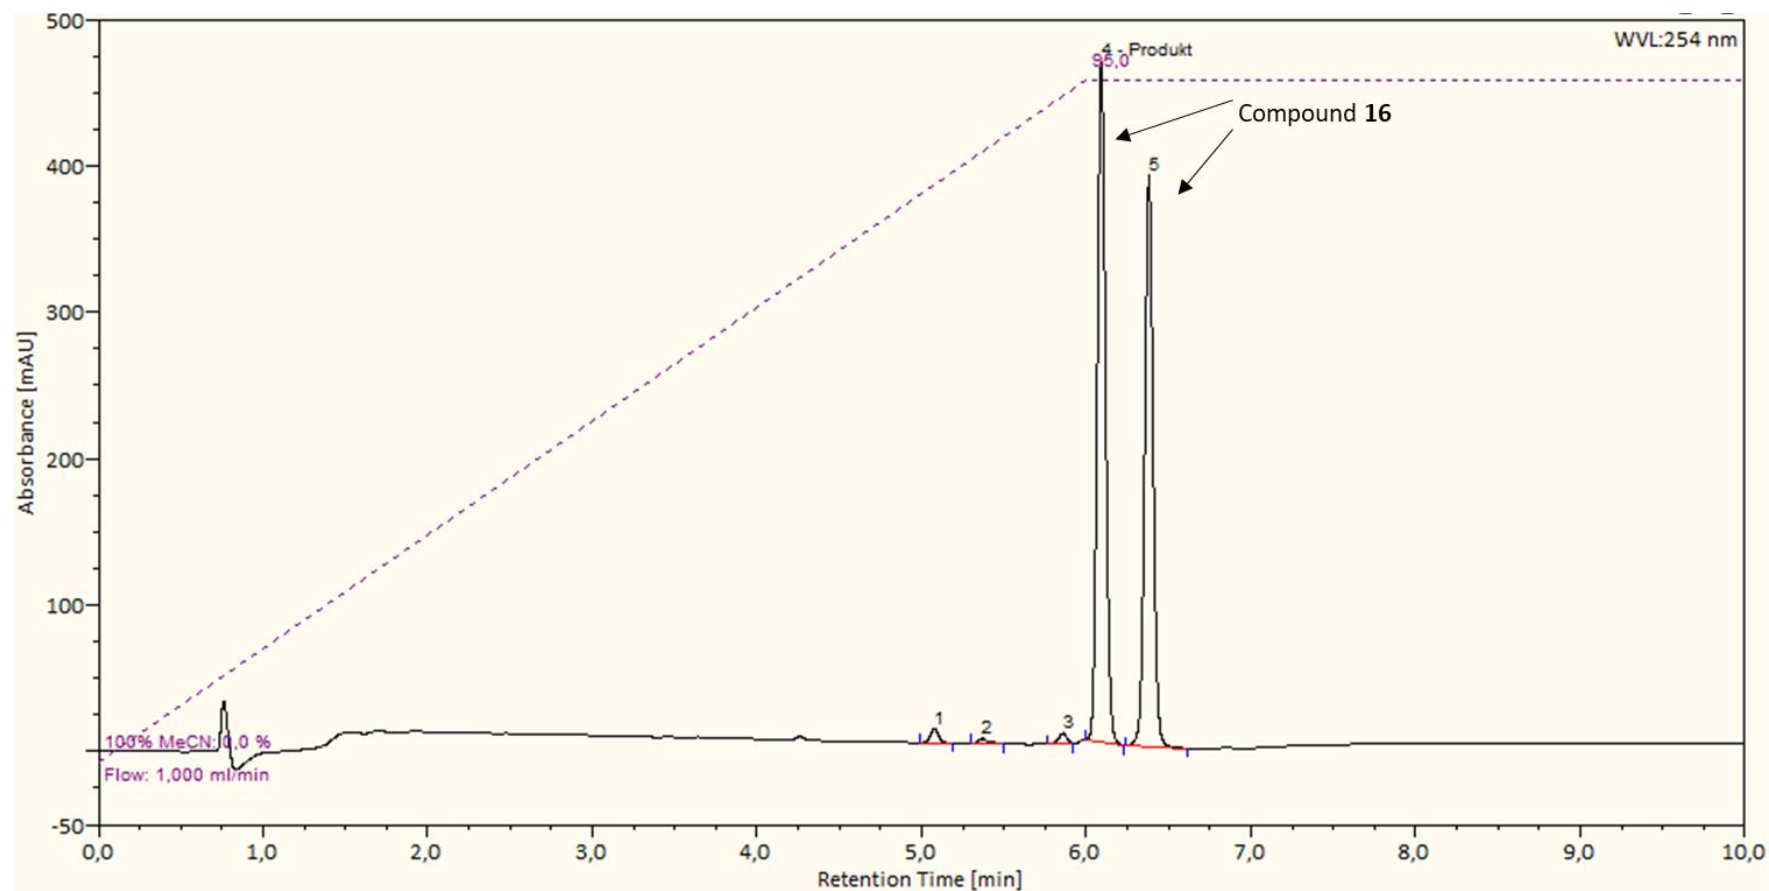

Figure S45. RP-HPLC profile of compound **16** using RP HPLC on C18 column (Waters XBridge® Oligonucleotide BEH C18) with a linear gradient from 0-100% of buffer B in buffer A over 10 min at 40 °C. Buffer A: 5 mM ammonium acetate, buffer B: MeCN

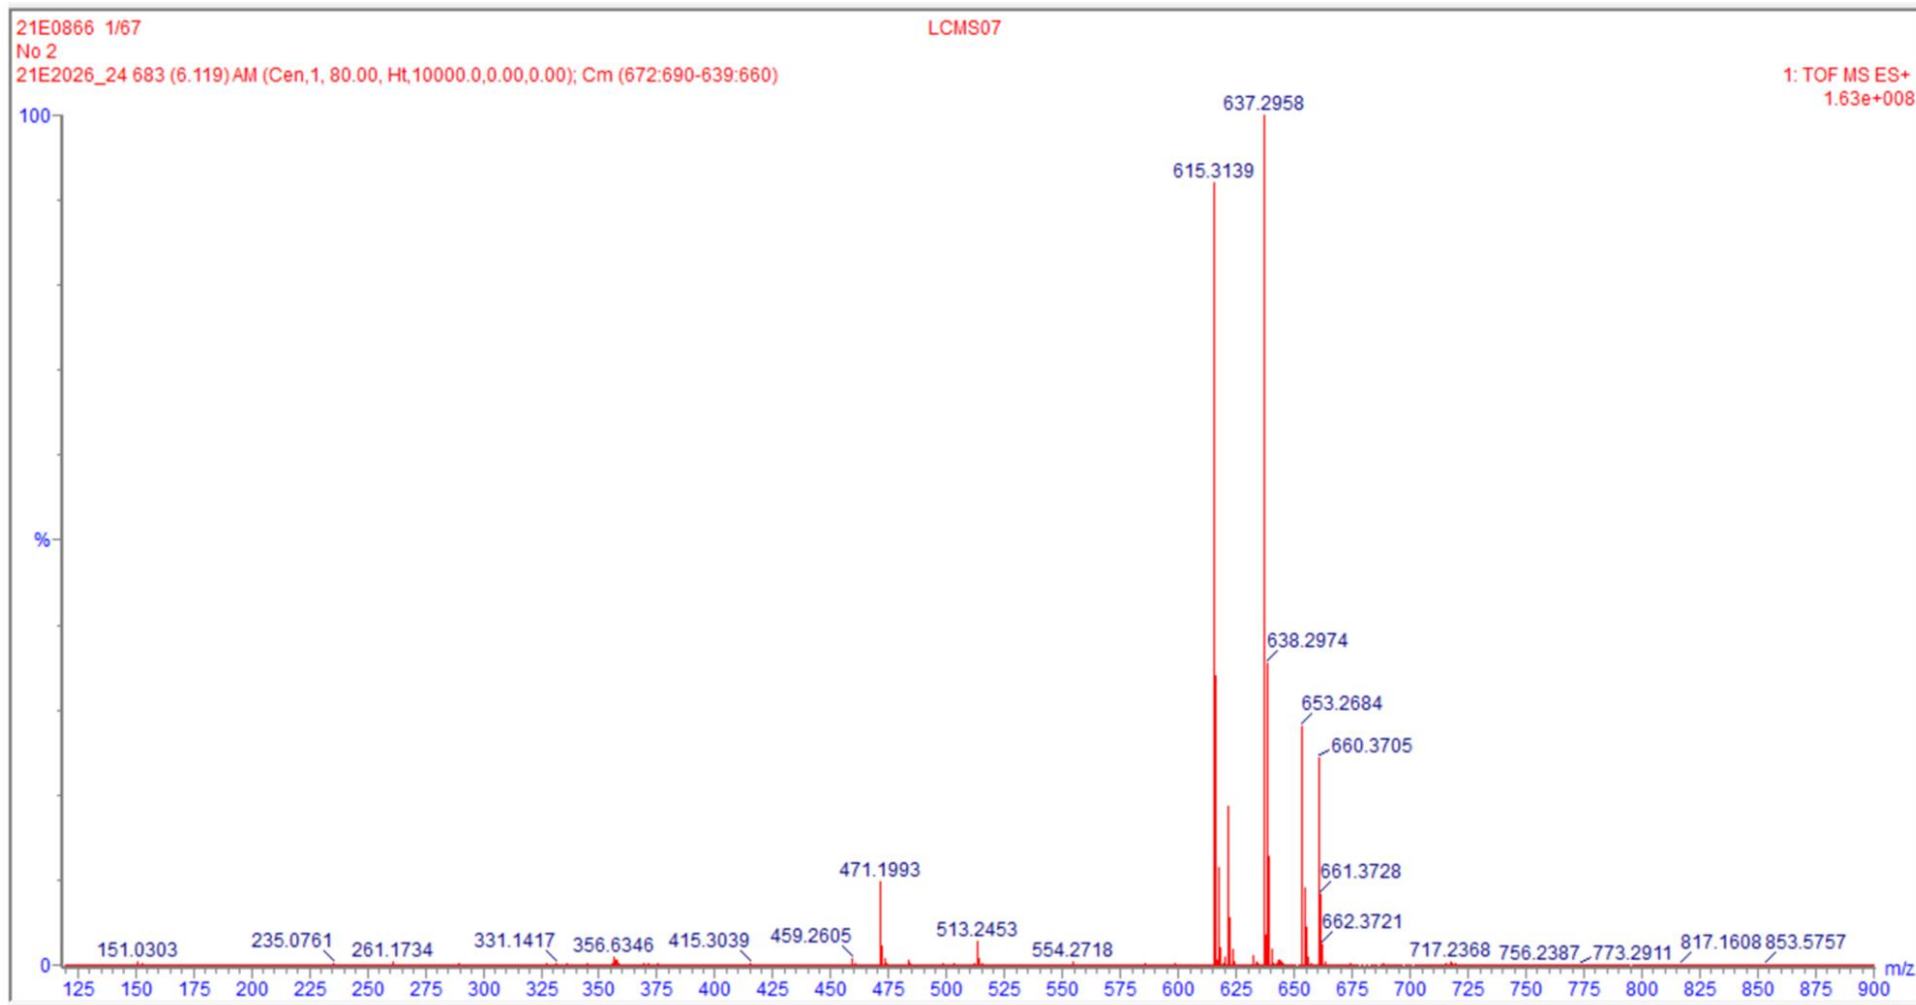

Figure S46. ESI-TOF mass spectrum of compound 2. Masses above  $[MH]^+ 615$  are adducts.

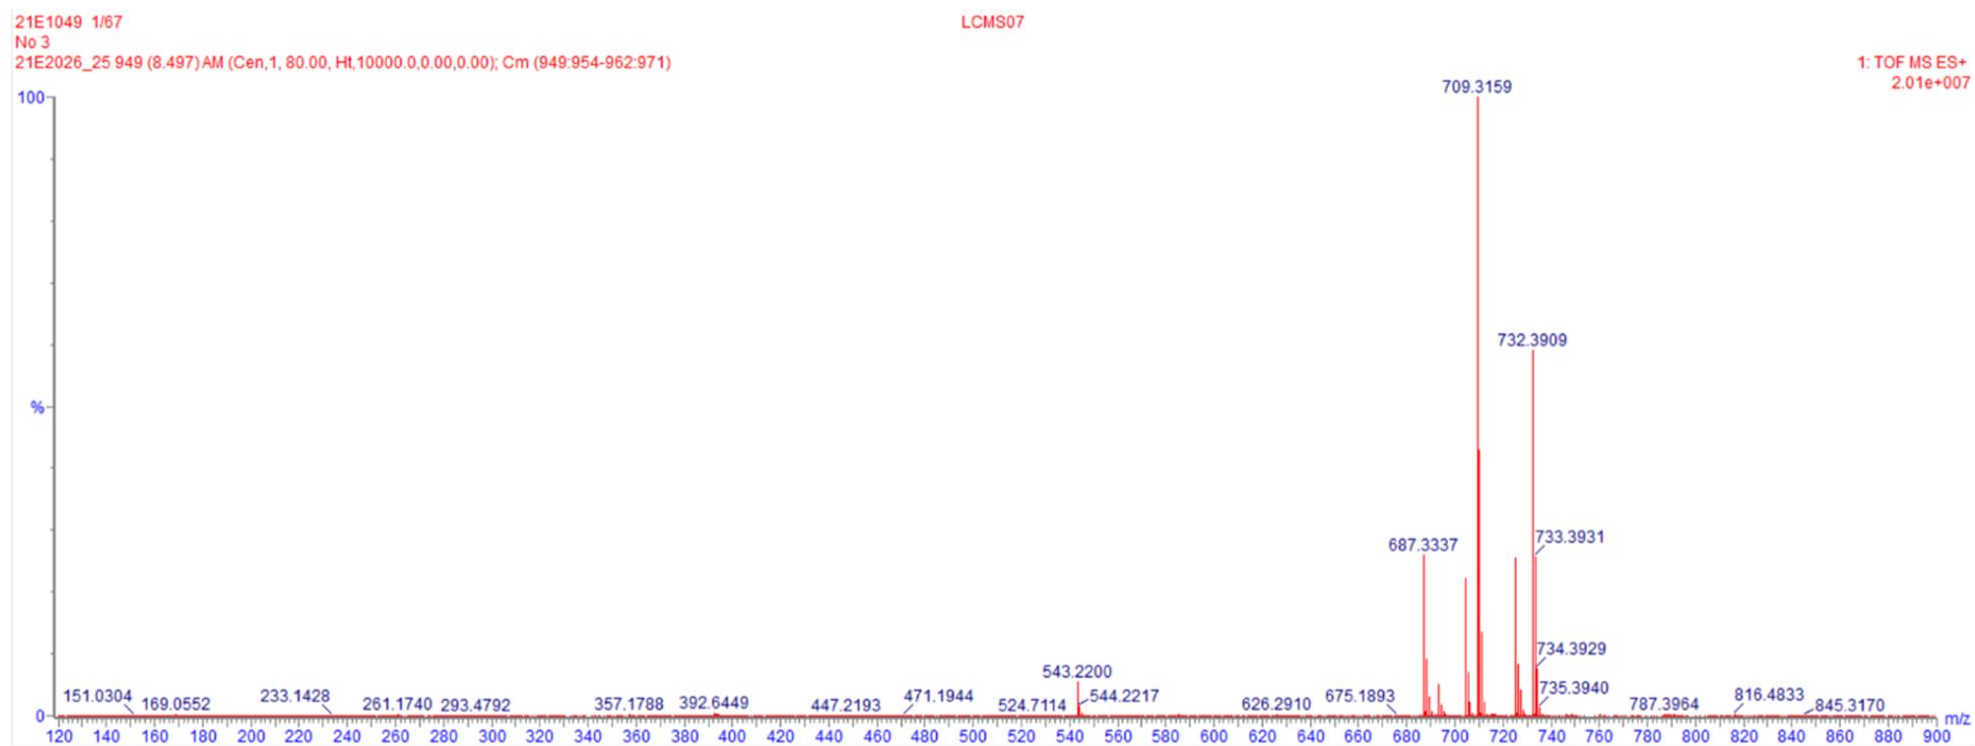

Figure S47. ESI-TOF mass spectrum of compound 3. Masses above  $[MH]^+ 687$  are adducts.

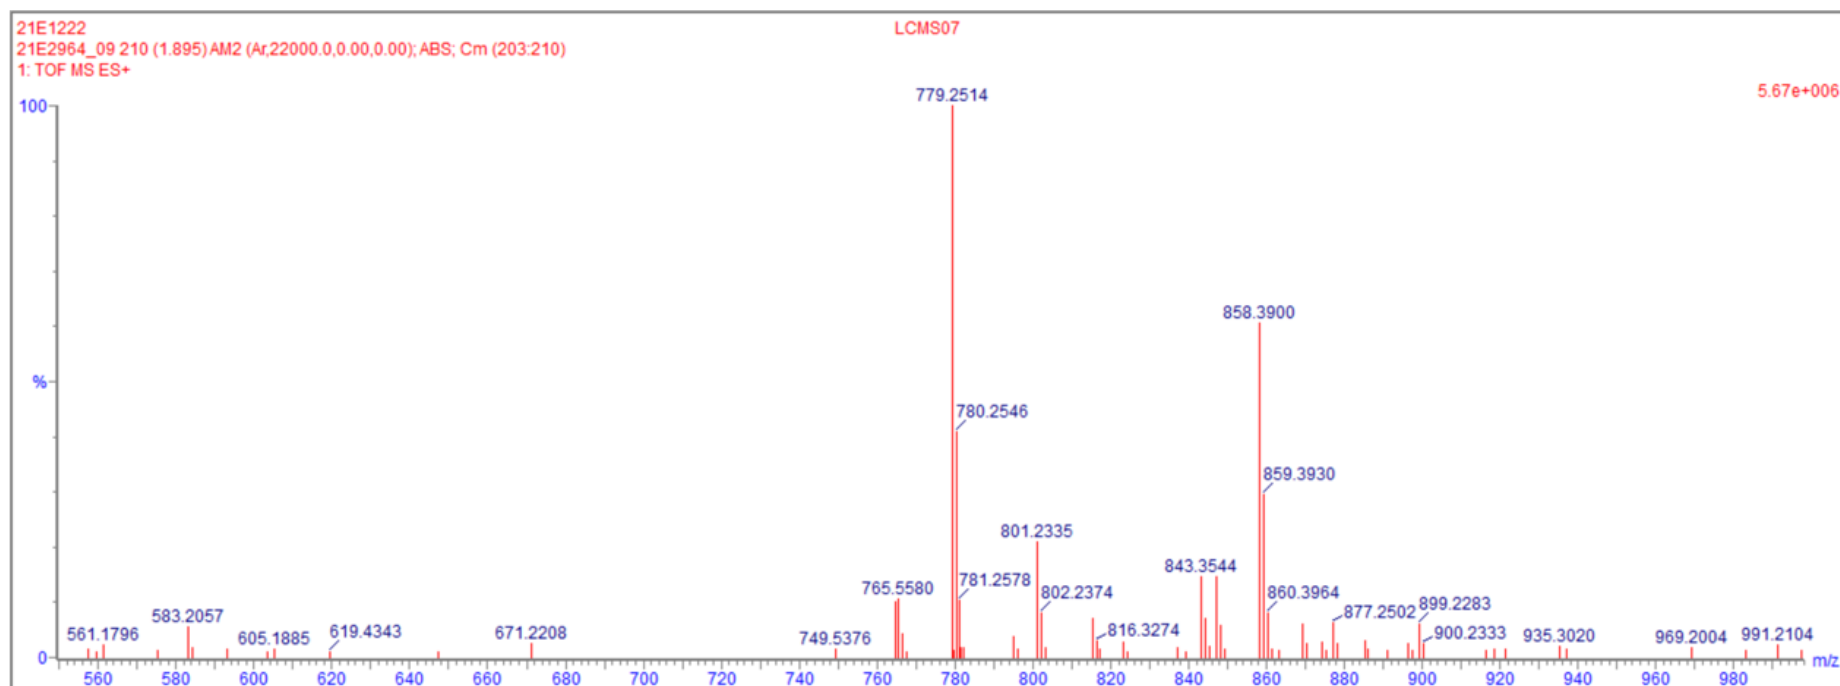

Figure S48. ESI-TOF mass spectrum of compound **6**.  $M/z$  779 =  $[MNa]^+$ .

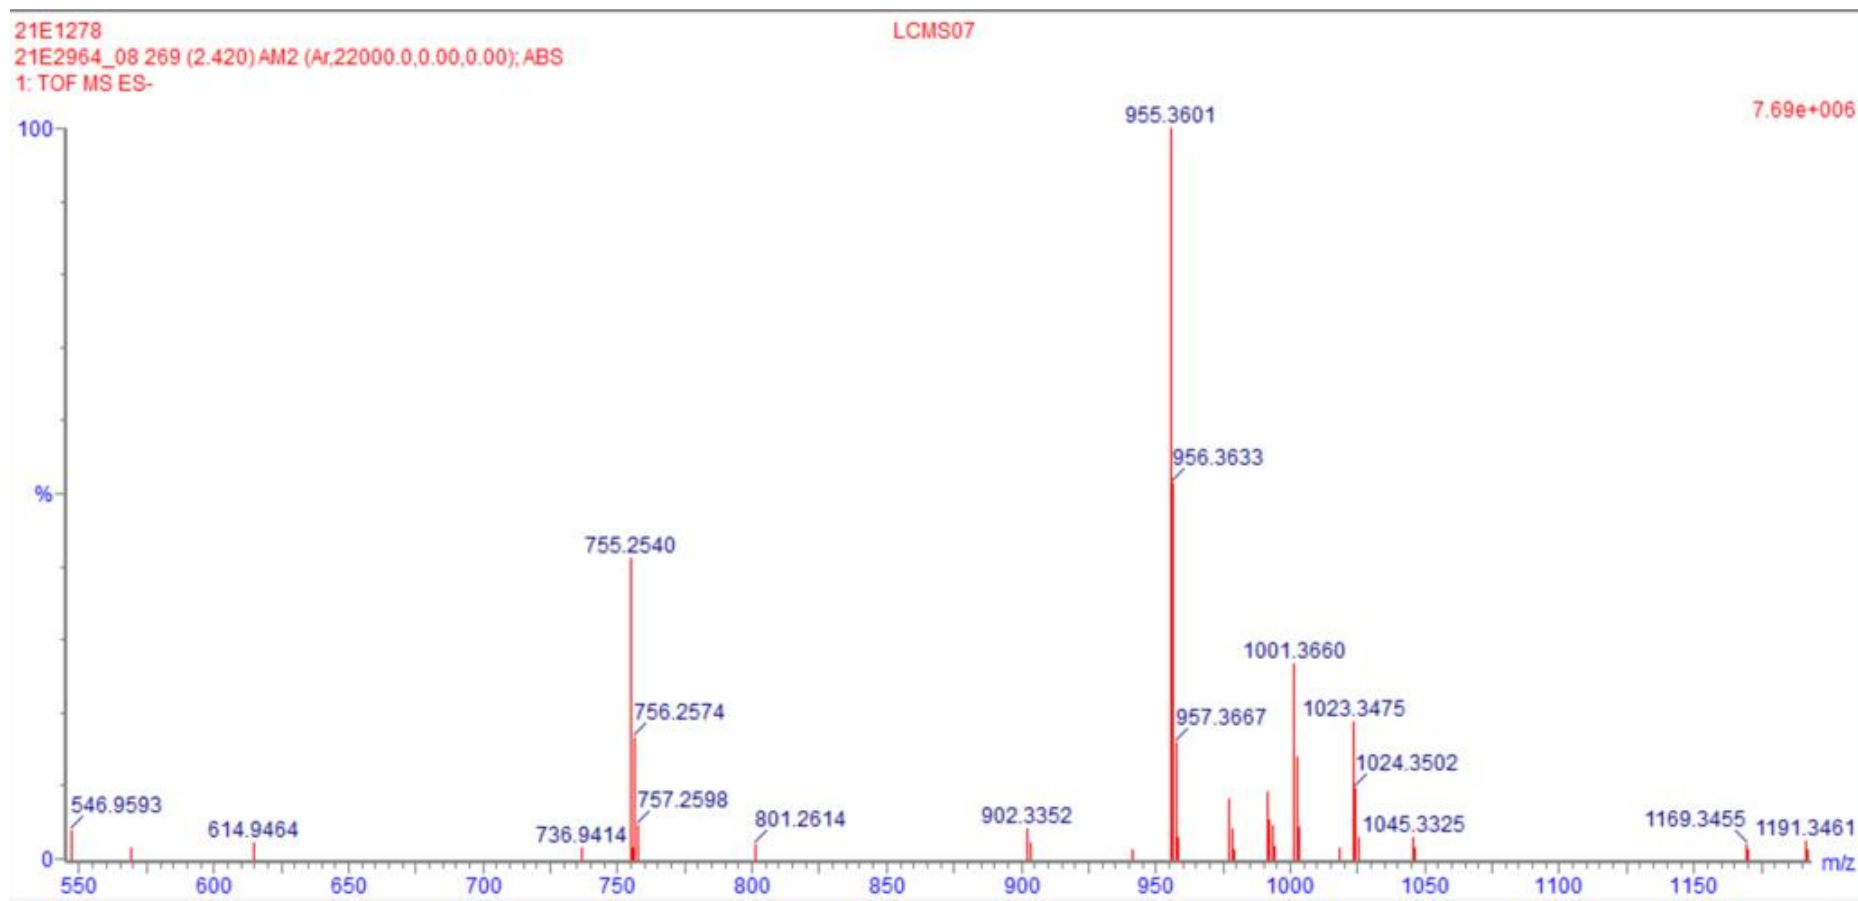

Figure S49. ESI-TOF mass spectrum of compound 7.

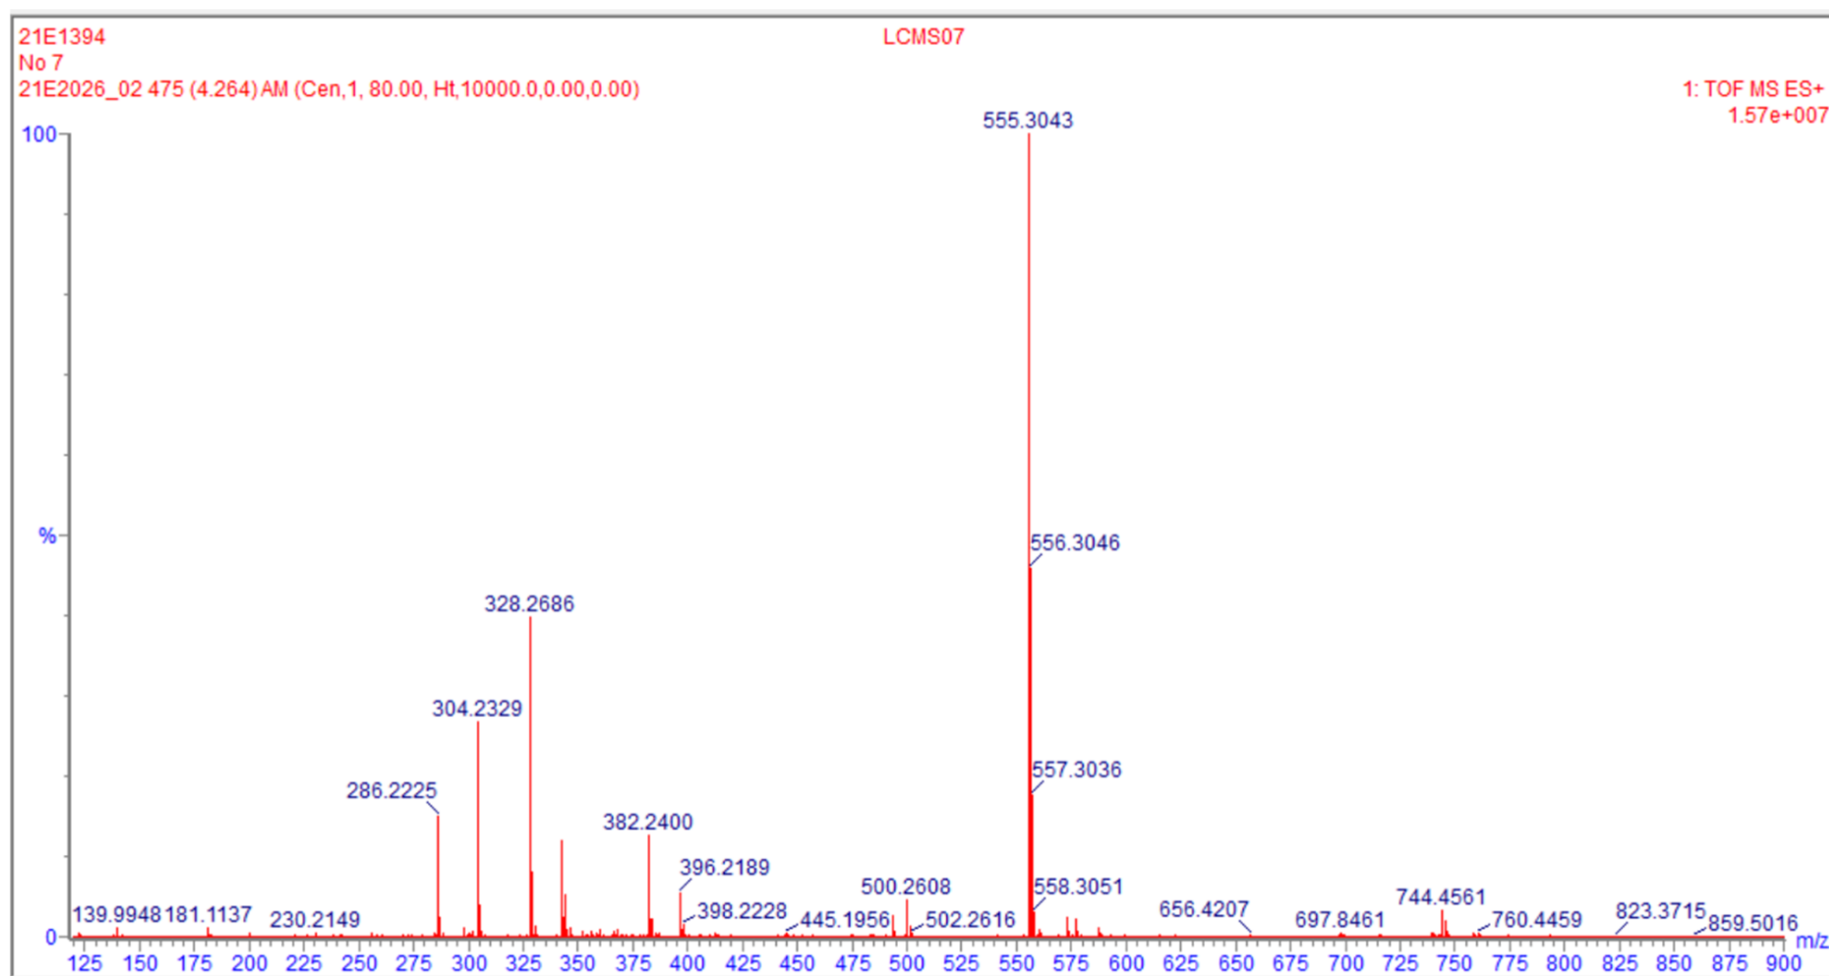

Figure S50. ESI-TOF mass spectrum of compound 9.

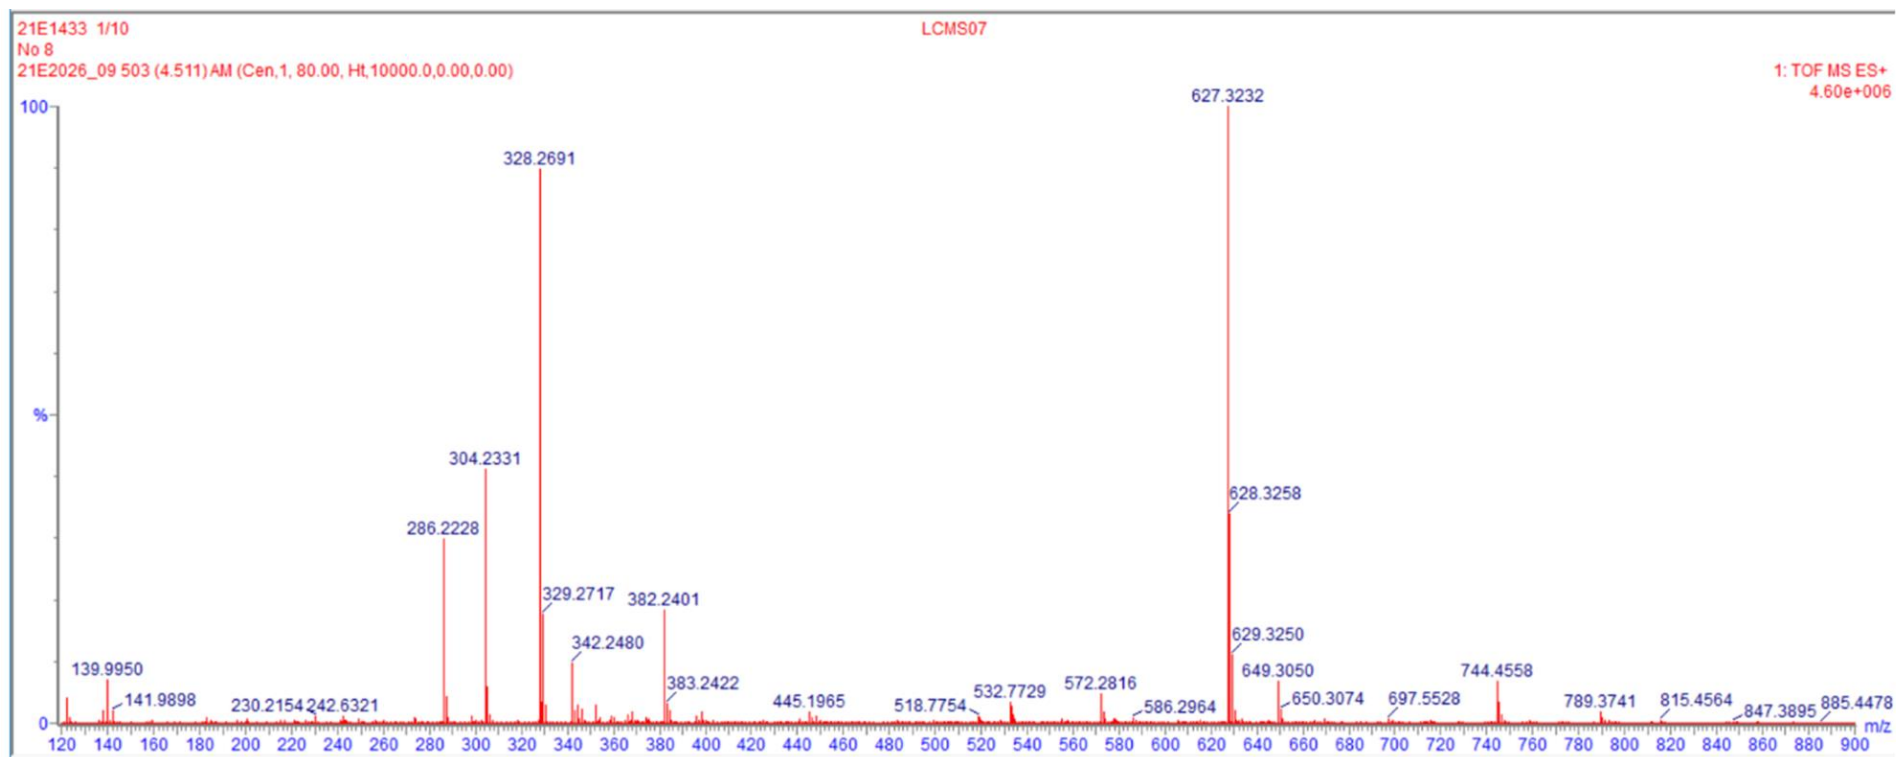

Figure S51. ESI-TOF mass spectrum of compound 10.

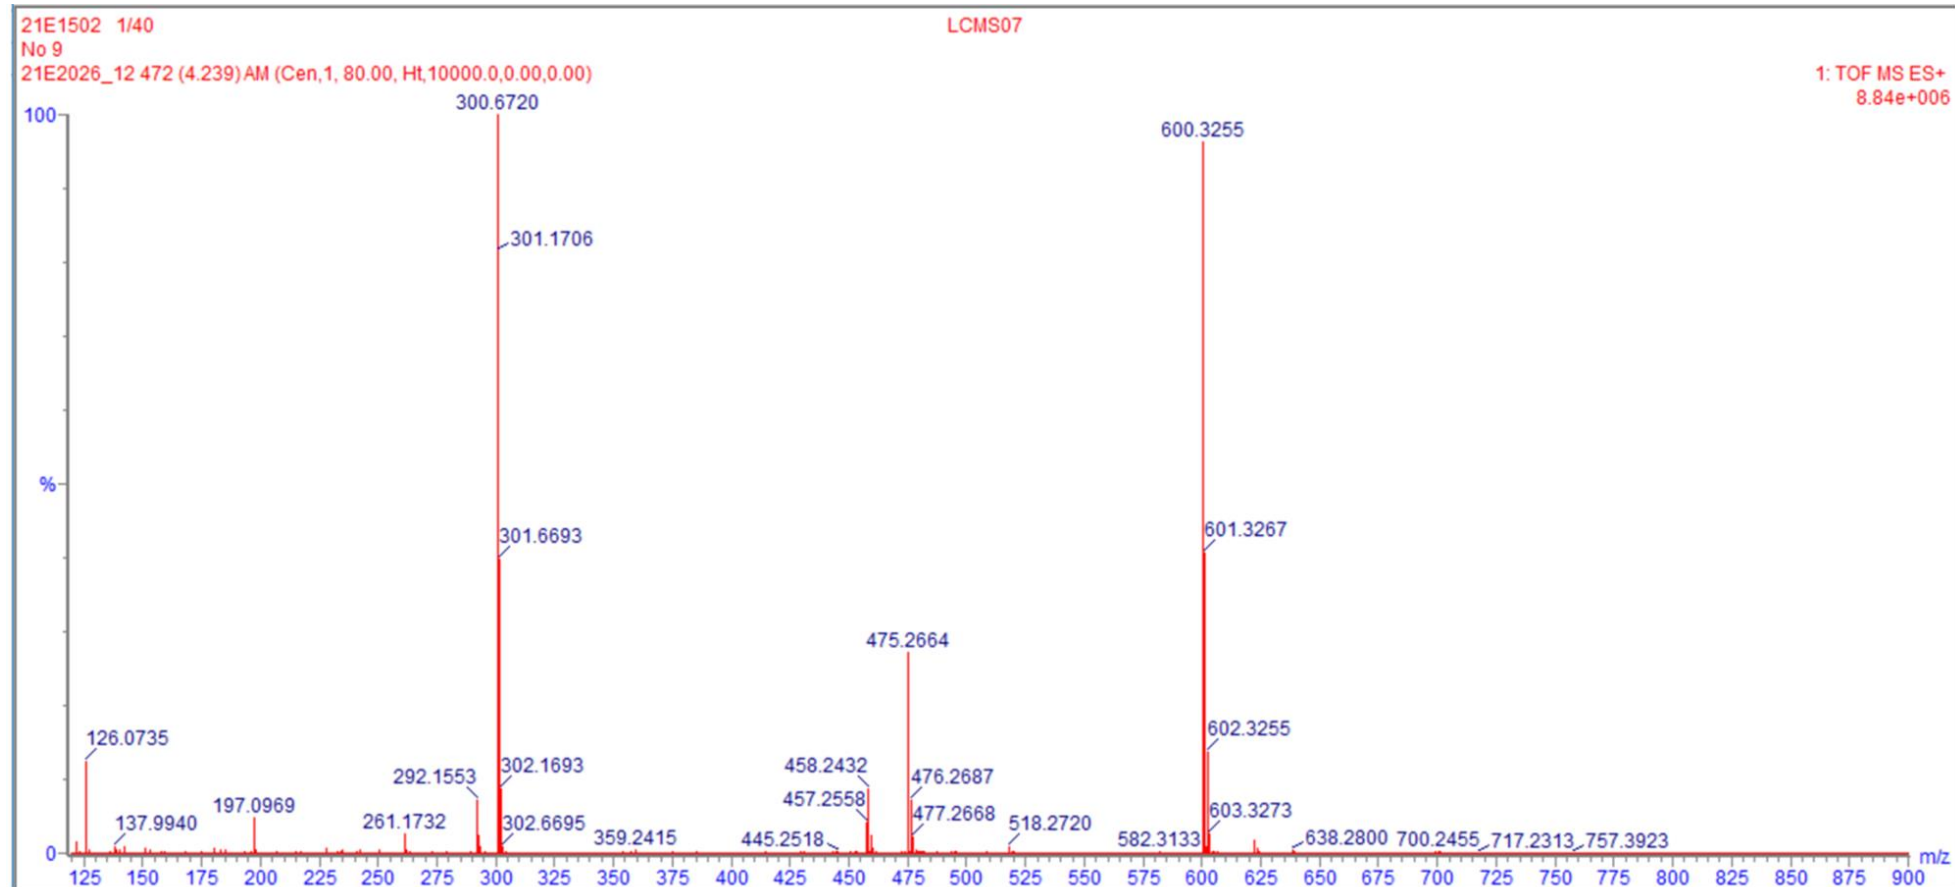

Figure S52. ESI-TOF mass spectrum of compound 11. M/z 300 is a fragment of the compound.



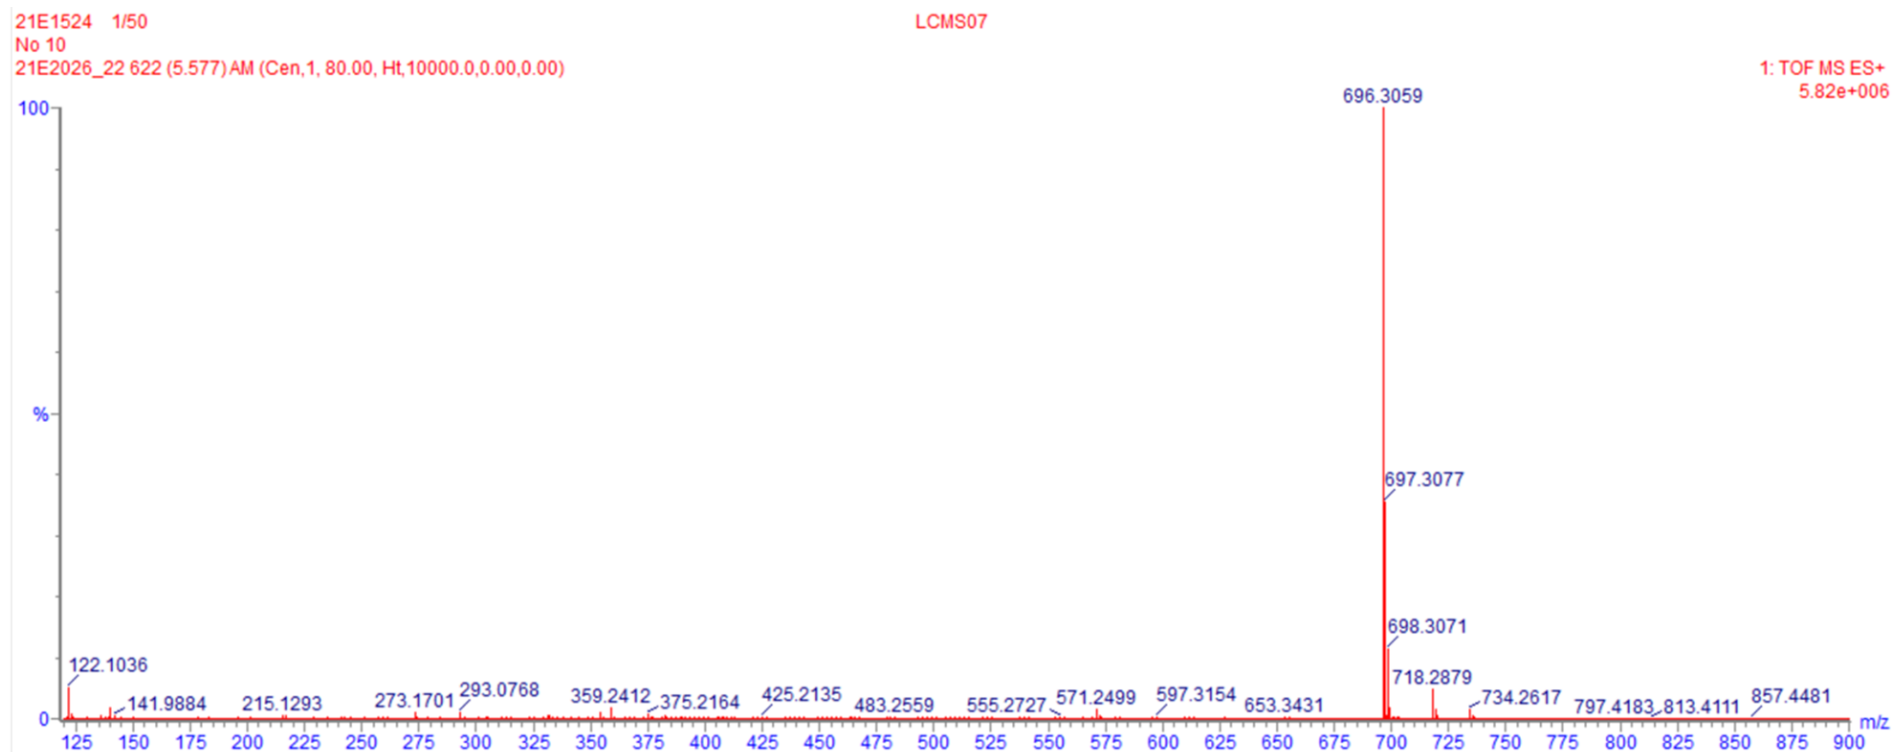

Figure S53. ESI-TOF mass spectrum of compound 12.

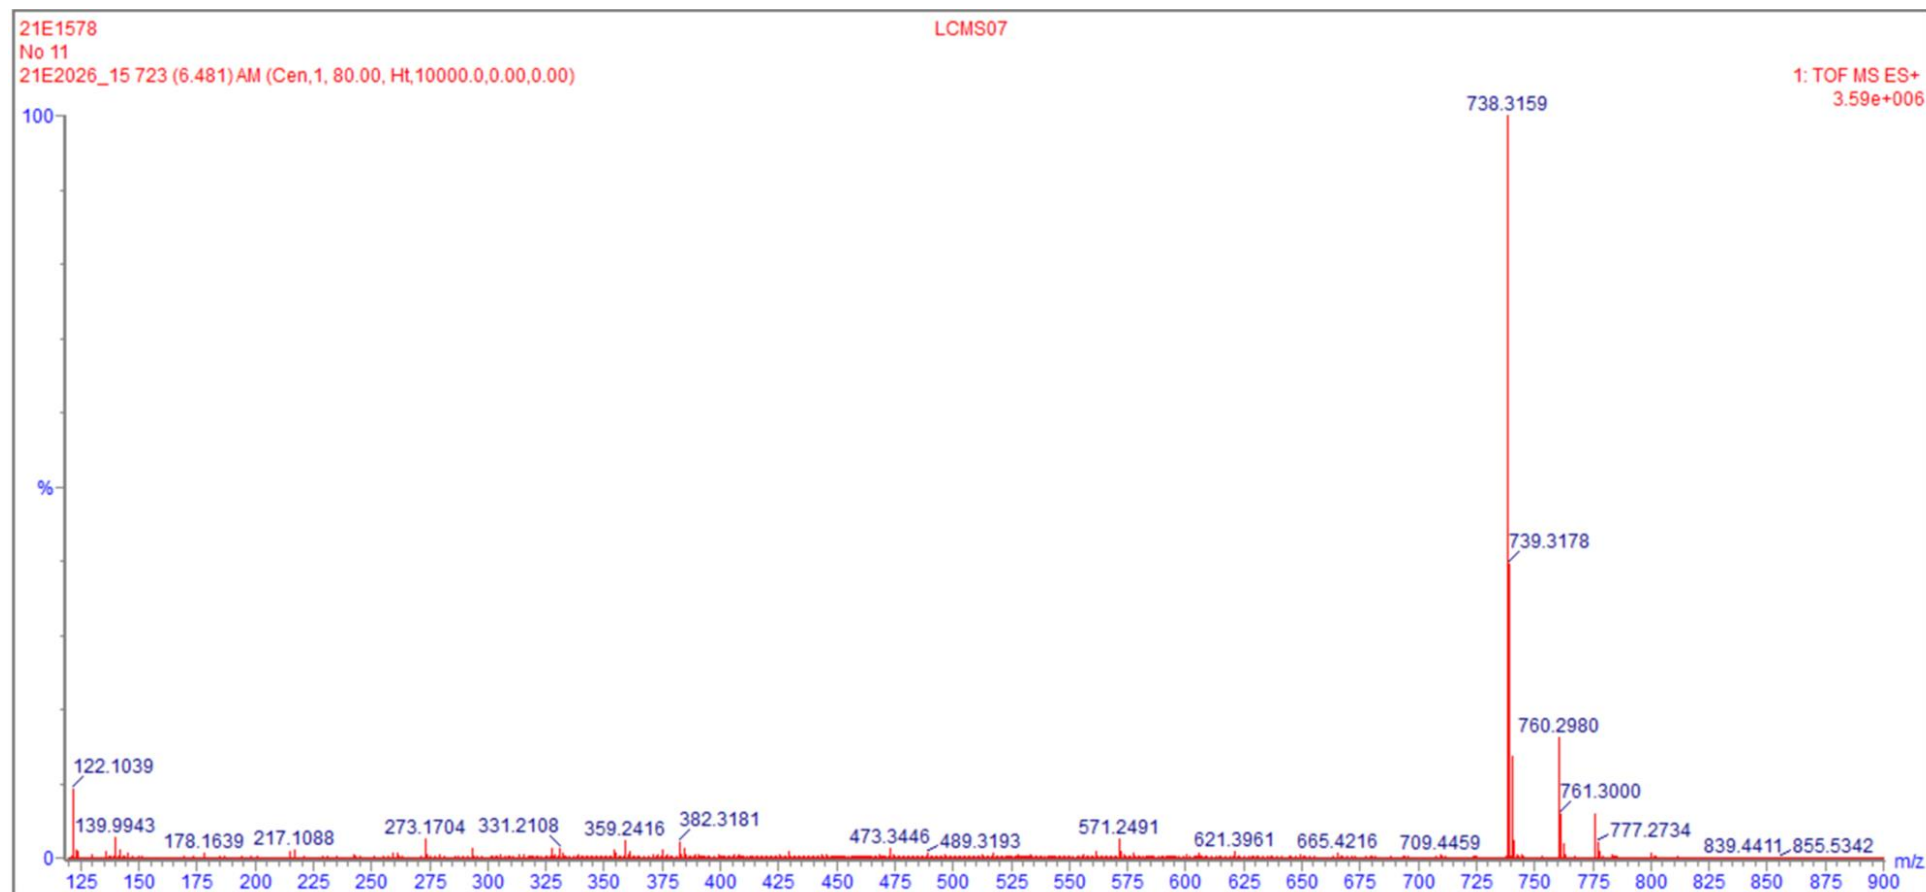

Figure S54. ESI-TOF mass spectrum of compound 13.

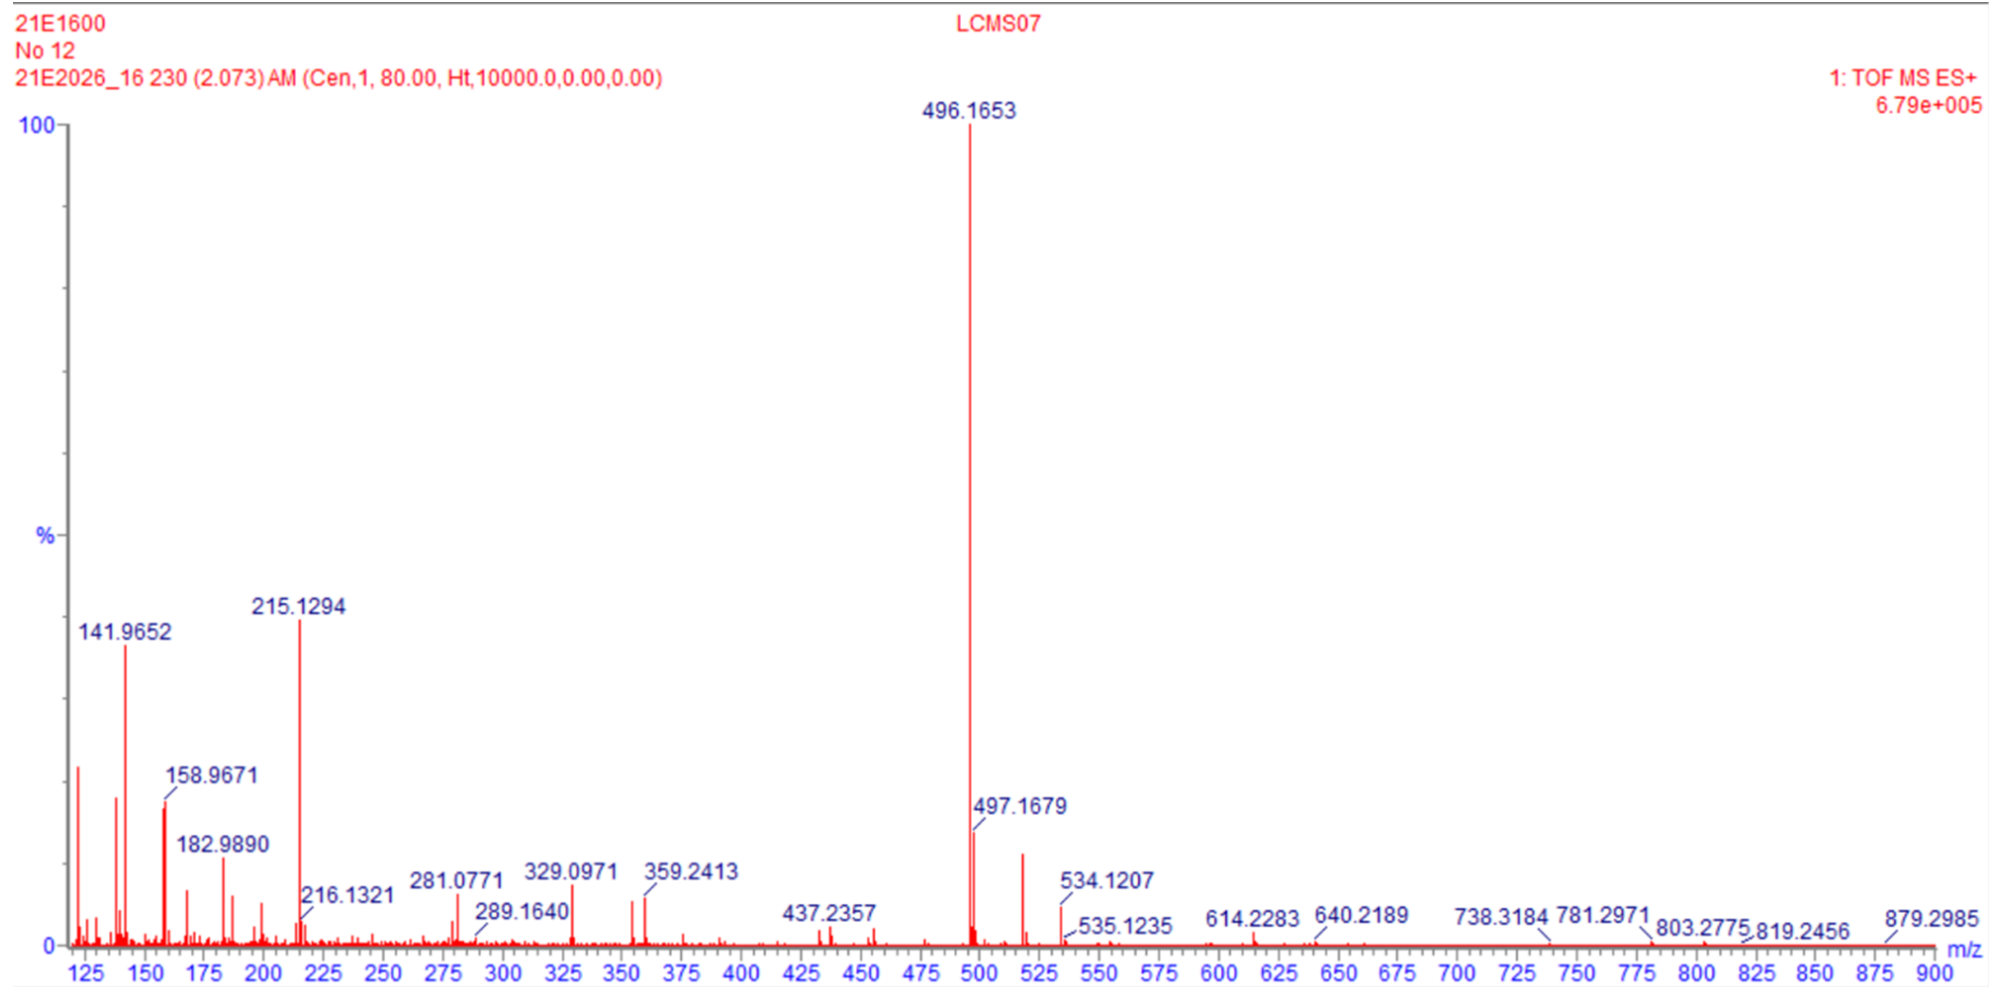

Figure S55. ESI-TOF mass spectrum of compound 14.

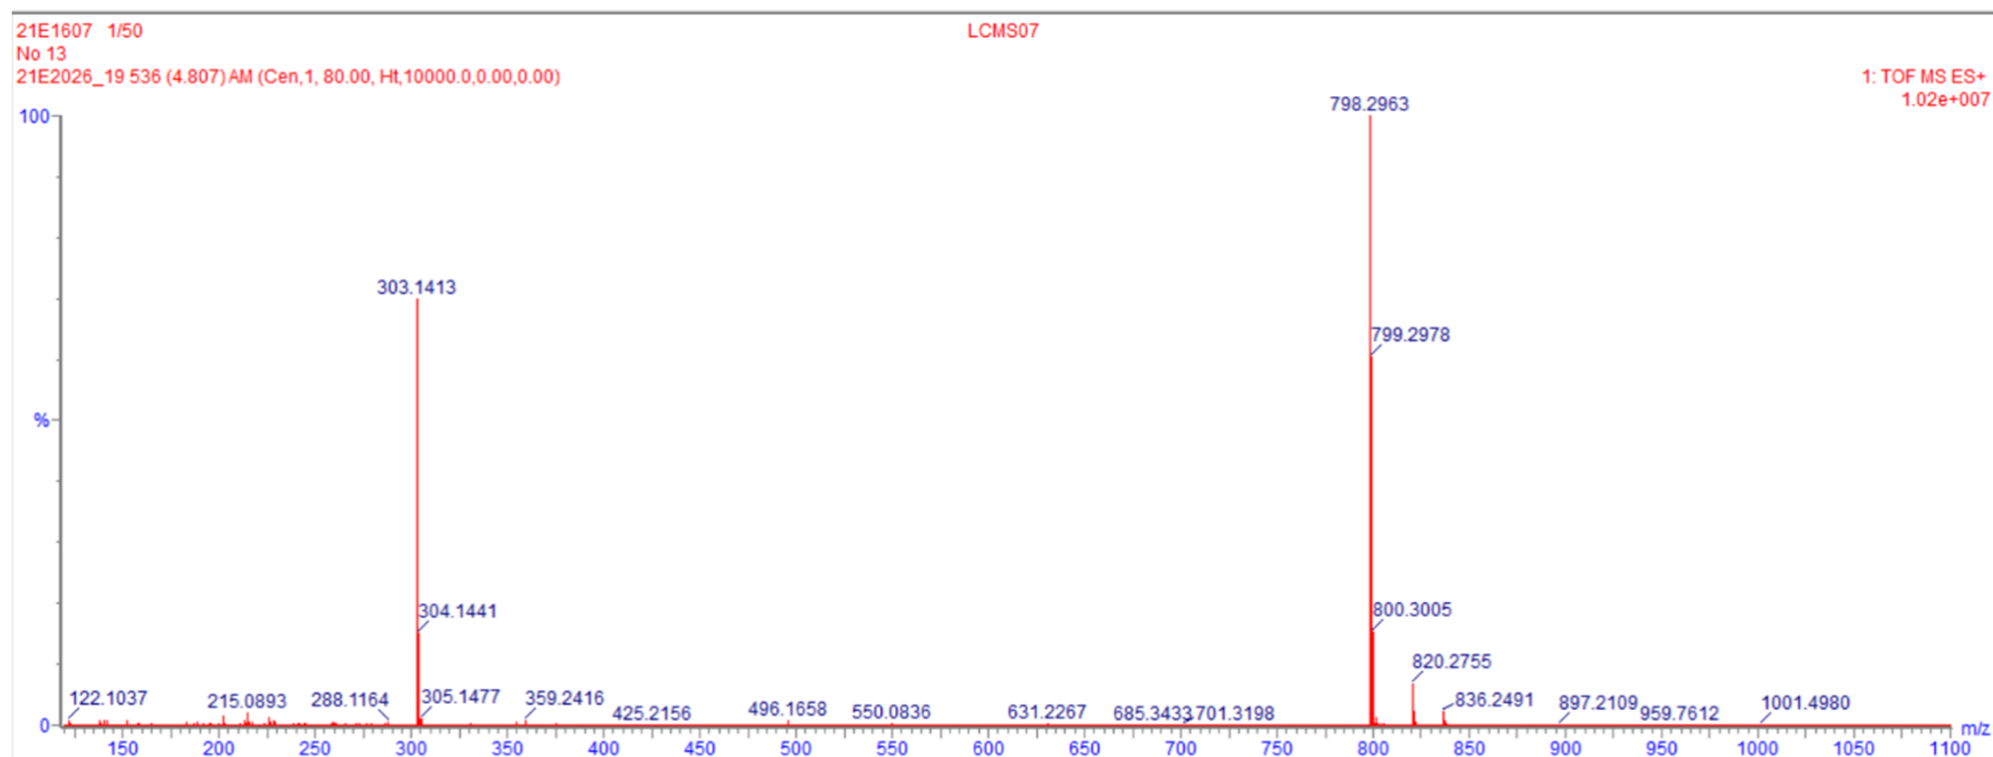

Figure S56. ESI-TOF mass spectrum of compound 15.  $m/z$  303 is a fragment of DMT.

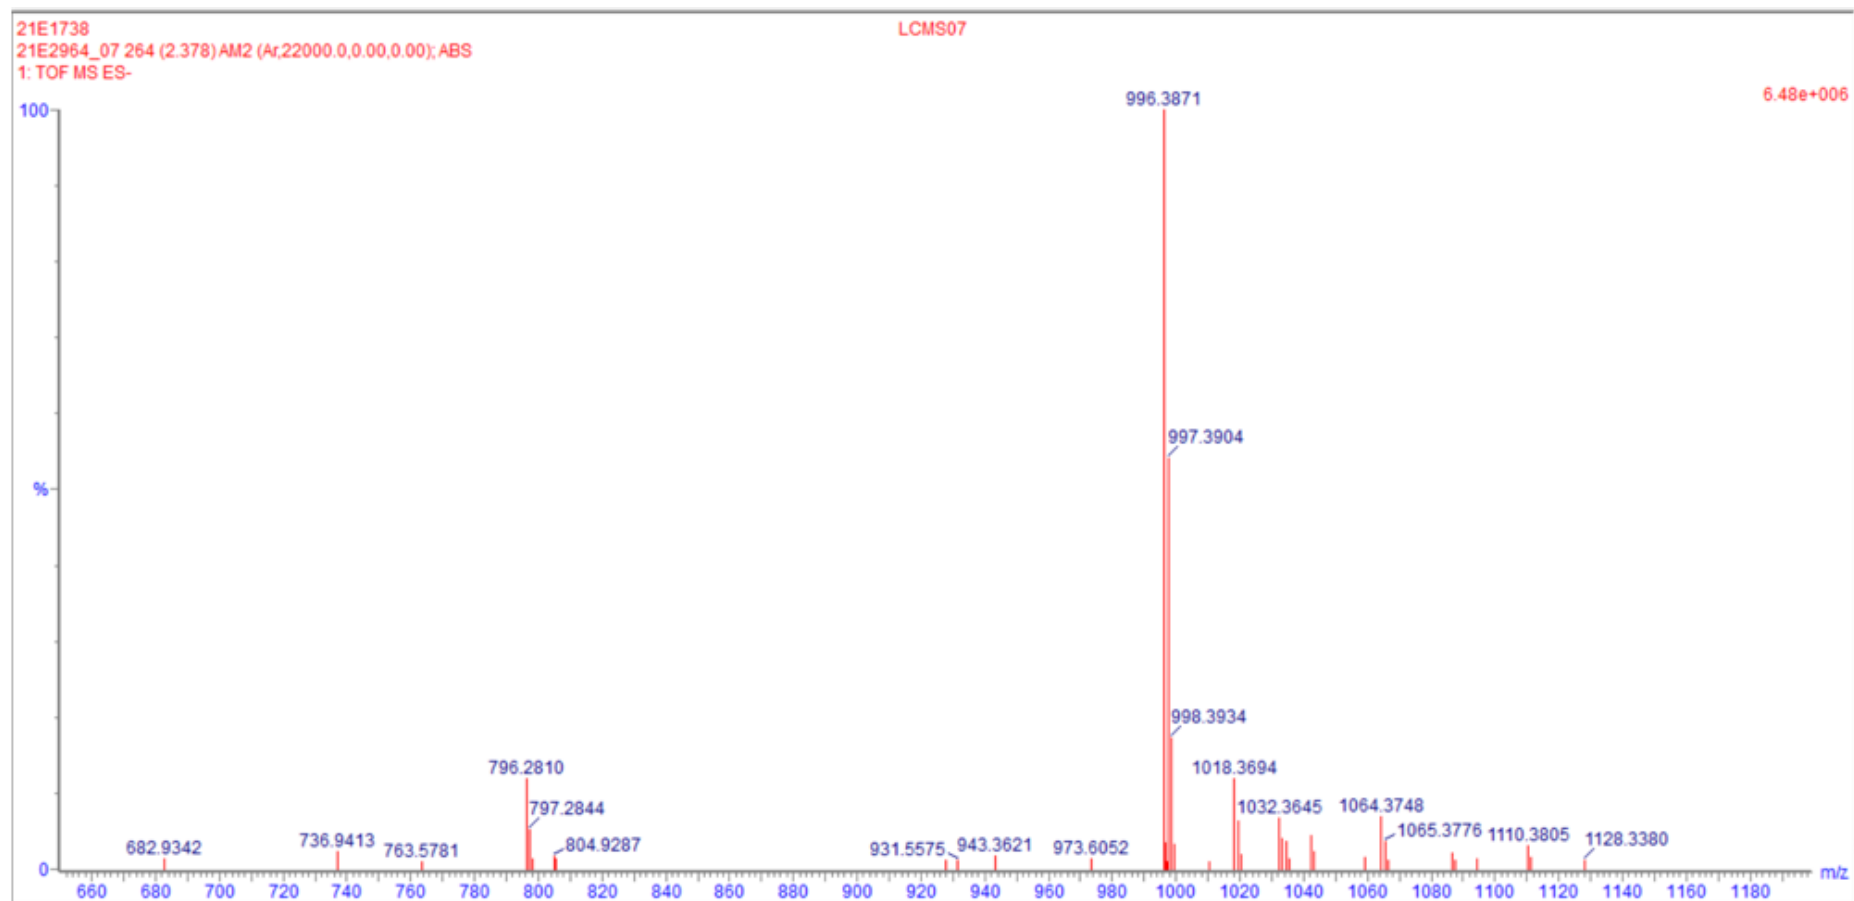

Figure S57. ESI-TOF mass spectrum of compound 16.
